# Supplementary material for: Ideal treatment timing of orthodontic anomalies—a German clinical S3 practice guideline
Source: Springer Nature journal article supplement (doi:10.1007/s00056-022-00409-3), 2022-06-17
Supplement: MOESM1 [file 23176886]

# **Ideale Behandlungszeitpunkte kieferorthopädischer Anomalien – eine klinische S3-Praxisleitlinie**

Kurztitel: Idealer kieferorthopädischer Behandlungszeitpunkt

Christian **Kirschneck**, Peter **Proff**, Christopher **Lux**

**Christian Kirschneck**, DDS, Priv.-Doz. Dr. Dr. (PhD)

Department of Orthodontics, University Hospital Regensburg

Franz-Josef-Strauss-Allee 11, 93053 Regensburg, Germany

E-mail: [christian.kirschneck@ukr.de](mailto:christian.kirschneck@ukr.de)

**Peter Proff**, MD, DDS, Professor Dr. Dr. (PhD)

Department of Orthodontics, University Hospital Regensburg

Franz-Josef-Strauss-Allee 11, 93053 Regensburg, Germany

E-mail: [peter.proff@ukr.de](mailto:peter.proff@ukr.de)

**Christopher Lux**, DDS, Professor Dr. (PhD)

Department of Orthodontics, University Hospital Heidelberg

Im Neuenheimer Feld 400, 69120 Heidelberg, Germany

E-mail: [christopher.lux@med.uni-heidelberg.de](mailto:christopher.lux@med.uni-heidelberg.de)

# Zusammenfassung

## Zweck

Der ideale Behandlungszeitpunkt in der Kieferorthopädie wird je nach Art und Ausmaß der vorliegenden Dysgnathie und Malokklusion kontrovers diskutiert, insbesondere im Hinblick auf Effizienz, Patientenbelastung und Behandlungsaufwand einer frühen gegenüber einer regulären oder späten Behandlung. Diese klinische S3-Praxisleitlinie soll klären, zu welchen Zeitpunkten eine kieferorthopädische Anomalie effektiv behandelt werden kann und wie sich die Behandlungseffizienz je nach Behandlungszeitpunkt unterscheidet.

## Methoden

Eine systematische Literaturrecherche wurde in verschiedenen Leitliniendatenbanken und den Datenbanken PROSPERO, MEDLINE (PubMed), Cochrane Library, Web of Science, ClinicalTrials.gov und der International Clinical Trials Registry Platform nach dem vordefinierten PICO (Population, Intervention, Comparison and Outcomes with added qualitative search terms)-Suchalgorithmus durchgeführt. Die Bewertung der wissenschaftlichen Evidenz der auf Eignung geprüften Einzelstudien erfolgte mit den Instrumenten SIGN (Scottish Intercollegiate Guidelines Network), AMSTAR II (Assessing the Methodological Quality of Systemic Reviews) and AXIS (Appraisal Tool to Assess the Quality of Cross-sectional Studies). Es wurden nur kontrollierte Studien mit hoher, akzeptabler oder moderater Qualität (und damit einem akzeptablen Bias-Risiko) berücksichtigt.

## Ergebnisse

Insgesamt 309 Studien aus über 11.000 gescreenten Quellen wurden als geeignet für die Aufnahme identifiziert und hinsichtlich Studienqualität und Bias-Risiko kritisch bewertet. Es wurden keine relevanten Leitlinien zu den Zielen der vorliegenden Leitlinie gefunden. Gewählte Mandatsträger von insgesamt 21 deutschen Fachgesellschaften und Verbänden verständigten sich auf insgesamt 19 evidenzbasierte Stellungnahmen und Empfehlungen auf Basis eines nominellen Konsensverfahrens.

## Schlussfolgerungen

Obwohl die meisten Fehlstellungen sowohl im frühen und späten Wechsel- als auch im bleibenden Gebiss wirksam behandelt werden können, deutet die Evidenz darauf hin, dass die Therapie einer ausgeprägten skelettalen oder dentalen Klasse-II-Anomalie frühzeitig begonnen werden kann, um das Risiko eines dentalen Frontzahntraumas zu reduzieren, während bei einer moderaten Klasse-II-Anomalie die Therapie vorzugsweise vor oder während des pubertären Wachstumsgipfels durchgeführt werden kann. Die Therapie einer skelettalen oder dentalen Klasse-III-Anomalie sollte frühzeitig begonnen werden, da dies auch die Notwendigkeit einer späteren Operation zur Korrektur der Anomalie reduziert. Die Behandlung ausgeprägter transversaler Anomalien sollte insbesondere bei skelettaler Mitbeteiligung oder resultierenden funktionellen Abweichungen frühzeitig im Oberkiefer begonnen werden, um die hohe Adaptivität der Oberkieferstrukturen bei jungen Patienten zu nutzen.

# Schlüsselwörter

Malokklusion

Interzeptive Behandlung

Dysgnathie

Dentition

Orofaziale Dyskinesie

## **Einleitung**

### *Hintergrund*

Der Hintergrund der S3-Leitlinie “Ideale Behandlungszeitpunkte kieferorthopädischer Anomalien” (AWMF-Registernummer: 083-038) ist, dass Zahnfehlstellungen, skelettale Dysgnathien und verschiedene Arten von orofazialen Dyskinesien weltweit eine hohe Prävalenz aufweisen und etwa eine von zwei Personen (oder mehr; [166]) betreffen. In Deutschland wurden im Jahr 2006 in der Altersgruppe der 10-Jährigen bei etwa 10,6 % der Kinder Kiefer- und Zahnstellungsanomalien mittleren Grades, bei 29,4 % ausgeprägte Anomalien und bei 1,4 % schwere Fehlstellungen vorgefunden [109]. Nach einer aktuellen Metaanalyse treten Klasse-II- und Klasse-III-Anomalien im Wechselgebiss in Europa bei 30 bzw. 3 % der Kinder auf, transversale Anomalien bei mindestens 36 % (Kreuzbiss, Mittellinienverschiebungen) und vertikale Anomalien bei etwa 22 % der Kinder, während Zahnengstände bei etwa 42 % aller Kinder mit Wechselgebiss vorliegen [166]. Eine deutsche epidemiologische Studie ergab, dass ein frontaler Kreuzbiss bleibender Zähne bei 3,4 % bzw. 5,1 % der Kinder registriert wurde, obwohl Anomalien der Klasse II viel häufiger waren als Anomalien der Klasse III [169]. Der optimale Zeitpunkt der kieferorthopädischen Behandlung ist daher von hoher klinischer Relevanz.

Es wird angenommen, dass Dysgnathien und Malokklusionen mit verschiedenen zahnärztlichen und medizinischen Pathologien assoziiert sind. Beispielsweise ist das Risiko eines Zahntraumas bei einer Anomalie der Klasse II/1, einer vergrößerten sagittalen Frontzahnstufe mit zurückliegendem Unterkiefer, um den Faktor 2–3 erhöht [224]. Einschränkungen des Nasen-Rachen-Raums, die zu einer Schlafapnoe führen, kann mit einer funktionellen kieferorthopädischen Therapie entgegengewirkt werden [305]. Gerade in der heutigen, von sozialen Netzwerken geprägten Gesellschaft werden Kinder und Jugendliche oft wegen ihrer Zahnfehlstellungen und ihres oralen Erscheinungsbildes gehänselt und gemobbt [74, 284]. Studien weisen darauf hin, dass dies negative Auswirkungen auf die Entwicklung sozialer Kompetenzen im Umgang mit anderen Menschen sowie auf die emotionale Entwicklung, das Selbstwertgefühl und die Lebensqualität haben kann [16, 70, 148, 149, 151, 152, 284]. Eine frühzeitige Korrektur kieferorthopädischer Anomalien kann in diesen Fällen positive Effekte haben und die Lebensqualität verbessern. Die Kieferorthopädie ist daher ein integraler Bestandteil der dentofazialen Diagnostik und Therapie auf verschiedenen Ebenen, einschließlich der Überwachung und Korrektur von Störungen der Zahn- und Kieferentwicklung.

Der ideale Behandlungszeitpunkt in der Kieferorthopädie wird je nach Art und Ausmaß der vorliegenden Dysgnathie und Malokklusion kontrovers diskutiert, insbesondere im Hinblick auf Effizienz, Patientenbelastung und Behandlungsaufwand einer frühen gegenüber einer regulären oder späten Behandlung. Der Behandlungsbeginn kann möglicherweise bereits im Milch- oder frühen Wechselgebiss, also vor dem 10. Lebensjahr (Frühbehandlung), im späten Wechselgebiss oder frühen permanenten Gebiss (Regelbehandlung) oder erst im bleibenden Gebiss nach weitgehendem Wachstumsabschluss (Spätbehandlung) erfolgen. Eine frühzeitige Behandlung im Milch- oder frühen Wechselgebiss kann darüber hinaus die alleinige Therapie oder Teil einer zweiphasigen Behandlungsstrategie sein, bestehend aus orthopädischen Maßnahmen während des pubertären Wachstumsschubs zur Korrektur skelettaler Dysgnathien oder Maßnahmen zur Verhinderung der Manifestation oder Progression von Anomalien (z. B. Beseitigung von Habits, Korrektur eines Zwangsbisses), gefolgt von anschließenden kieferorthopädischen Maßnahmen zur Korrektur von dentoalveolären Zahnstellungs- und Zahnbogenanomalien. Bei ausgeprägten skelettalen Anomalien kann nach Abschluss des Wachstums eine kombinierte kieferorthopädisch-kieferchirurgische Behandlung indiziert sein.

*Ziele der S3-Leitlinie*

Identifizierung und Standardisierung des idealen Behandlungszeitpunktes für kieferorthopädische Anomalien unter Berücksichtigung eines individuell optimalen Behandlungsergebnisses, eines angemessenen Kosten-Nutzen-Verhältnisses sowie der Minimierung möglicher Risiken und des Therapieaufwandes. Insbesondere sollte geklärt werden, zu welchen Zeitpunkten eine kieferorthopädische Anomalie effektiv behandelt werden kann und wie sich die Behandlungseffizienz je nach Behandlungszeitpunkt unterscheidet.

Zwei Hauptfragen wurden für Anomalien der Klasse I (Zahnengstand), Klasse II, Klasse III sowie für transversale und vertikale Anomalien nach dem PICO(Population/Patient, Intervention, Comparison, Outcome)-Schema adressiert:

1. Hat bei Patienten mit einer Klasse-I/II- oder -III-Anomalie bzw. transversalen oder vertikalen Anomalie (P) eine frühe kieferorthopädische Behandlung oder eine reguläre/späte kieferorthopädische Behandlung (I) einen medizinischen Nutzen/Schaden/schadenspräventiven Nutzen im Vergleich zu keiner kieferorthopädischen Behandlung (C) in Bezug auf (O) den skelettalen/dentoalveolären kieferorthopädischen Behandlungserfolg, die Okklusion bzw. Kaufunktion, die dentofaziale Ästhetik bzw. das Weichgewebsprofil, die Traumaprophylaxe (Frontzahntrauma), die mundgesundheitsbezogene Lebensqualität (OHRQoL) und die psychische Entwicklung, die Atmung (Atemwegsraum, Schlafapnoe), das Schlucken und Sprechen sowie die prothetisch-konservative Versorgbarkeit des Gebisses?
2. Hat bei Patienten mit einer Klasse-I/II- oder -III-Anomalie bzw. transversalen oder vertikalen Anomalie (P) eine frühe kieferorthopädische Behandlung (I) im Vergleich zu einer regulären/späten kieferorthopädischen Behandlung (C) einen medizinischen Nutzen/Schaden/schadenspräventiven Nutzen hinsichtlich (O) oben genannter Outcomes (O) einschließlich einer Reduktion der Notwendigkeit einer weiteren Therapie, der Patientenbelastung oder Nebenwirkungen sowie der Stabilität des Behandlungsergebnisses?

### *Zielgruppe*

Diese Leitlinie richtet sich an Zahnärzte aller Fachrichtungen, Fachärzte für Mund-, Kiefer- und Gesichtschirurgie, Kinderheilkunde, Hals-Nasen-Ohren-Heilkunde, Psychiatrie und

Klinische Psychologie, d. h. an alle Fachrichtungen, die an der interdisziplinären Behandlung von Fehlstellungen und Dysgnathien sowie Funktionsstörungen des stomatognathen Systems beteiligt sind. Zielgruppe sind alle Patienten jeden Alters, die eine kieferorthopädische Behandlung benötigen oder eine zusätzliche Behandlung in der ambulanten kieferorthopädischen Versorgung wünschen. Es werden keine zusätzlichen Ein- oder Ausschlusskriterien explizit definiert, um eine allgemeine Anwendbarkeit der Leitlinie zu ermöglichen.

## **Material und Methode**

Diese S3-Leitlinie wurde nach den Leitlinien der Arbeitsgemeinschaft der Wissenschaftlichen Medizinischen Fachgesellschaften (AWMF; Version 2.0 vom 19.11.2020, <http://www.awmf.org/leitlinien/awmf-regelwerk.html>) entwickelt, dem Handbuch „Systematic Research for Evidence Synthesis and Guidelines“ (2. Auflage, 01. April 2019, Cochrane Deutschland Foundation, <https://www.cochrane.de/de/literaturrecherche>) und dem Leitfadentwicklerhandbuch des Scottish Intercollegiate Guidelines Network (SIGN; Nr. 50 Edinburgh, <https://www.sign.ac.uk/our-guidelines/sign-50-a-guideline-developers-handbook/>).

### *Systematische Literaturrecherche*

Wie von der Cochrane Foundation [58] empfohlen, erfolgte am 01./02. August 2019 erstmals eine systematische Recherche nach einem vordefinierten Suchalgorithmus und einer an individuelle Datenbanken angepassten Strategie in den Leitliniendatenbanken der AWMF, des Guidelines International Network (GIN), TRIP (Turning Research into Practice), des Ärztlichen Zentrums für Qualität in der Medizin (ÄZQ), SIGN, National Institute for Health and Care Excellence (NICE), der KCE Reports of the Belgian Health Care Knowledge Centre und des Instituts für Qualität und Wirtschaftlichkeit im Gesundheitswesen (IQWiG; Supplementary Table 1). Titel, Abstracts und Volltexte wurden von 2 der Autoren (CK und PP) auf Eignung geprüft, bei fehlender Übereinstimmung wurde vom dritten Autor (CL) final entschieden.

Darüber hinaus wurde eine systematische Literaturrecherche in den Datenbanken PROSPERO, MEDLINE (PubMed), Cochrane Library (CDRS, CENTRAL, DARE, NHS Economic

Evaluation Database, HTA), Web of Science, ClinicalTrials.gov und der International Clinical Trials Registry Platform nach einem vordefinierten PICO (Population, Intervention, Comparison and Outcomes with added qualitative search terms)-Suchalgorithmus und einer an individuelle Datenbanken und Rechercheschnittstellen angepassten Strategie durchgeführt, insbesondere in Bezug auf Schlüsselwörter, Syntax und die enthaltenen Dokumente (Supplementary Table 2). Wo immer möglich, wurden publizierte und validierte Suchfilter für die Leitlinien und Studiendesigns (Methodenfilter) verwendet. Veröffentlichungen beliebigen Datums in englischer oder deutscher Sprache wurden berücksichtigt. Es wurden nur Leitlinien, systematische Reviews und Metaanalysen, kontrollierte Kohorten-/Fall-Kontroll-Studien sowie randomisierte, kontrollierte Studien (RCTs) eingeschlossen. Für Datenbanken mit kontrolliertem Vokabular/Thesaurus wurden passende Keywords ermittelt. Für die Auswahl der Suchbegriffe wurden die Suchstrategien bestehender systematischer Reviews [36, 189, 255, 300] oder Review-Protokolle [136] berücksichtigt. Um korrelative Querschnittsstudien zu identifizieren, welche für die Bewertung von Assoziationen kieferorthopädischer Anomalien mit klinisch-medizinischen Zielgrößen relevant sind, wurde am 13. September 2020 eine separate systematische Literaturrecherche für diesen Studientyp in der MEDLINE-Datenbank (PubMed) nach einem vordefinierten PICO-Suchalgorithmus und –strategie durchgeführt (Supplementary Table 3). Veröffentlichungen beliebigen Datums in englischer Sprache wurden berücksichtigt. Titel und Abstracts wurden von 2 der Autoren (CK und PP) auf Eignung geprüft, unterschiedliche Bewertungen wurden vom dritten Autor (CL) gelöst. Die Volltexte der verbleibenden Artikel wurden jeweils von 2 Prüf(zahn)ärzten (Supplementary Table 4) auf Eignung geprüft, Meinungsverschiedenheiten von einem der Autoren (CK) gelöst wurden. Des Weiteren wurde eine manuelle Literaturrecherche aller internationalen kieferorthopädischen Fachzeitschriften mit Impact Factor im Jahr 2019 (alle Ausgaben) durchgeführt, darunter *Journal of Orofacial Orthopedics*, *American Journal of Orthodontics and Dentofacial Orthopedics*, *European Journal of Orthodontics*, *Orthodontics and Craniofacial Research*, *Angle Orthodontist*, *Korean Journal of Orthodontics*, *Progress in Orthodontics* und *Seminars in Orthodontics*. Eine manuelle Auswertung der Bibliographien/Verzeichnisse erfolgte nicht.

### *Beurteilung der wissenschaftlichen Evidenz*

Die Bewertung der wissenschaftlichen Evidenz (Studienqualität, Biasrisiko) der einzelnen Studien erfolgte für RCTs, Kohortenstudien und Fall-Kontroll-Studien nach SIGN (<https://www.sign.ac.uk/what-we-do/methodology/checklists/>), für Metaanalysen und

systematische Reviews nach AMSTAR II (<https://amstar.ca/Amstar-2.php>) und für Querschnittsstudien nach AXIS (<https://bmjopen.bmj.com/content/6/12/e011458.full>). Im Rahmen der Leitlinie wurden nur kontrollierte Studien berücksichtigt, die nach SIGN, AXIS bzw. AMSTAR II eine hohe oder annehmbare bzw. moderate Qualität (und damit ein akzeptables Bias-Risiko) aufwiesen.

### *Entwicklung von Stellungnahmen und Empfehlungen*

Gewählte Mandatsträger von insgesamt 21 wissenschaftlichen Fachgesellschaften und Verbänden (Supplementary Table 5) wurden zu einer Konsensuskonferenz am 3. November 2020 eingeladen. Die Leitlinie wurde unter Beteiligung eines Patientenvertreters erstellt. Die Ansichten und Vorlieben der Patienten wurden so identifiziert und einbezogen. Die Stellungnahmen und Empfehlungen wurden unter neutraler Moderation eines AWMF-Methodenexperten auf Basis eines nominellen Gruppenprozesses abgestimmt. Die Stellungnahmen und Empfehlungen wurden unter Berücksichtigung der Vorgaben der AWMF und des ÄZQ formuliert. Der Grad der Empfehlung (A – stark, B – moderat, 0 – schwach) richtet sich nach der Stärke der verfügbaren Evidenz, berücksichtigt aber auch die klinische Relevanz des Zielparameters, die Effektgröße und die Übertragbarkeit von Studienergebnissen auf die Patientenzielgruppe. Zur Ermittlung der Konsensstärke wurden die prozentuale und absolute Anzahl der Zustimmungen (Zustimmung/Ablehnung/Enthaltung) ermittelt, wobei >95 bzw. >75–95% einem „starken Konsens“ bzw. einem „Konsens“ entsprechen.

## **Ergebnisse**

Die systematische Recherche nach verfügbaren Leitlinien ergab keine Leitlinien mit relevantem Inhalt zu den Zielen, Fragestellungen oder Einschlusskriterien (PICO) dieser Leitlinie.

Die systematische Hauptliteraturrecherche ergab nach Entfernung von Dubletten insgesamt 9751 Datensätze, von denen 8979 nach Titel und Abstract nach den PICO-Kriterien ausgeschlossen wurden. Da die Volltexte von 19 Artikeln nicht abgerufen werden konnten, wurden 753 Artikel gelesen und auf ihre Eignung geprüft. Schließlich konnten 232 Studien in diese Leitlinie aufgenommen werden (Abbildung 1a).



Die zusätzliche systematische Literaturrecherche für Querschnittsstudien ergab insgesamt 1281 Datensätze, von denen 1180 nach Titel und Abstract nach den PICO-Kriterien ausgeschlossen wurden. Da die Volltexte von 6 Artikeln nicht abgerufen werden konnten, wurden 95 Artikel gelesen und auf Eignung geprüft. Schließlich konnten 77 korrelative Studien in diese Leitlinie aufgenommen werden (Abbildung 1b).

Aufgrund der Komplexität und Heterogenität der verfügbaren Literatur wurde auf der Konsensuskonferenz (20/0/0) einstimmig entschieden, dass die Forschungsfragen zu vertikalen Anomalien und dentalem Engstand in der vorliegenden Version der Leitlinie nicht behandelt werden und bei einer zukünftigen Aktualisierung der Leitlinie nach erneuter systematischer Literaturrecherche unter enger Einbindung aller am Leitlinienprozess beteiligten Fachgesellschaften und Verbände berücksichtigt werden.

## **Stellungnahmen und Empfehlungen**

### *Stellungnahme 1: Kieferorthopädische Anomalien und Kaufunktion*

**Es gibt Hinweise, dass eine kieferorthopädische Anomalie zu einer Einschränkung bzw. einem Leidensdruck im Hinblick auf die Kaufunktion führen kann.** (Konsens 18/1/1, LoE [„level of evidence“] 2+; [2, 47, 57, 81, 102, 141, 145–147, 172, 179, 265, 274]).

### *Stellungnahme 2: Kieferorthopädische Anomalien und mundgesundheitsbezogene Lebensqualität (MLQ)*

**Es gibt Hinweise, dass eine kieferorthopädische Anomalie zu einer Einschränkung bzw. einem Leidensdruck im Hinblick auf die mundgesundheitsbezogene Lebensqualität (MLQ) bzw. psychische Entwicklung führen kann.** (Konsens 18/1/0, LoE 2+; [16, 19, 31, 70, 74, 117, 119, 133, 148, 149, 151, 152, 164, 177, 183, 218, 227, 251, 256, 257, 259, 263, 284]).

*Stellungnahme 3: Kieferorthopädische Anomalien und Störungen der Atmung, des Sprechens und des Schluckens*

**Es gibt Hinweise, dass Zusammenhänge zwischen kieferorthopädischen Anomalien und Störungen der Atmung („airway space“, Schlafapnoe), des Sprechens bzw. des Schluckens bestehen** (Konsens 19/1/0, LoE 2+/3) [35, 50, 73, 87, 120, 131, 143, 155, 185, 196, 206, 228, 246, 267, 295, 298].

*Stellungnahme 4: Kieferorthopädische Anomalien und Risiko für dentales Frontzahntrauma*

**Es bestehen Zusammenhänge zwischen einer vergrößerten sagittalen Frontzahnstufe (Overjet) und einem erhöhten Risiko für ein dentales Frontzahntrauma. Es gibt Hinweise, dass sich eine fehlende Lippenabdeckung sowie ein frontal offener Biss hier ebenfalls ungünstig auswirken können** (starker Konsens 21/1/0, LoE 2+: [20, 39, 45, 49, 60, 88, 126, 127, 140, 173, 199, 224, 225, 232, 247, 261]):

*Stellungnahme 5: Prothetisch-konservierende Versorgung des Gebisses*

**Die prothetisch-konservierende Versorgung des Gebisses kann bei kieferorthopädischen Anomalien eingeschränkt sein** (starker Konsens 21/1/0).

*Stellungnahme 6: Kieferorthopädische Therapie und mundgesundheitsbezogene Lebensqualität (MLQ)*

**Eine kieferorthopädische Behandlung führt in Abhängigkeit von der vorliegenden Anomalie im Vergleich zu einer nicht durchgeführten kieferorthopädischen Behandlung zu einer Verbesserung im Hinblick auf die methodisch fassbare**

**mundgesundheitsbezogene Lebensqualität (MLQ;** starker Konsens 20/0/1, LoE 1++; [5, 7, 42, 67, 72, 90, 123, 128, 176, 204, 208, 226, 231, 252, 300, 311, 313]).

*Stellungnahme 7: Klasse II – Frühbehandlung – skelettale, dentoalveoläre und ästhetische Verbesserungen*

**Eine kieferorthopädische Frühbehandlung im Milch- bzw. frühen Wechselgebiss führt – je nach beabsichtigter Therapie – bei einer Klasse-II-Anomalie im Vergleich zu einer nicht durchgeführten kieferorthopädischen Behandlung zu**

- 1. einer Verbesserung im Hinblick auf die skelettale Lagebeziehung von Oberkiefer und Unterkiefer,**
- 2. dentoalveolären Verbesserungen bezüglich Zahnstellung, Zahnbogenform bzw. kaufunktioneller Okklusion,**
- 3. Verbesserungen der dentofazialen Ästhetik bzw. des Weichteilprofils,**
- 4. Verbesserungen des nasopharyngealen und oropharyngealen Luftraumes**

(Konsens 18/1/0, LoE 1++; [13, 21, 26, 63, 75, 82, 86, 100, 101, 106, 112, 124, 125, 170, 174, 178, 180, 184, 187, 190, 191, 202, 203, 212–214, 216, 217, 219, 220, 222, 233, 238, 242, 244, 245, 249, 258, 264, 286, 292, 294]).

*Stellungnahme 8: Klasse II – Frühbehandlung – Risiko für dentales Frontzahntrauma*

**Eine kieferorthopädische Frühbehandlung im Milch- bzw. frühen Wechselgebiss kann bei einer Klasse-II-Anomalie im Vergleich zu einer nicht durchgeführten kieferorthopädischen Behandlung das Risiko für ein dentales Frontzahntrauma reduzieren** (starker Konsens 20/1/0, LoE 1++; [36, 54, 213, 269, 270]).

*Stellungnahme 9: Klasse II – Regel-/Spätbehandlung – skelettale, dentoalveoläre und ästhetische Verbesserungen*

**Eine kieferorthopädische Regel-/Spätbehandlung im späten Wechselgebiss bzw. permanenten Gebiss führt – je nach beabsichtigter Therapie – bei einer Klasse-II-**

## **Anomalie im Vergleich zu einer nicht durchgeführten kieferorthopädischen Behandlung zu**

- 1. einer Verbesserung im Hinblick auf die skelettale Lagebeziehung von Oberkiefer und Unterkiefer,**
- 2. dentoalveolären Verbesserungen bezüglich Zahnstellung, Zahnbogenform bzw. kaufunktioneller Okklusion,**
- 3. Verbesserungen der dentofazialen Ästhetik bzw. des Weichteilprofils**

(Konsens 18/1/0, LoE 1++; [8, 10, 13–15, 17, 26, 33, 34, 40, 44, 51, 52, 56, 62, 65, 77–80, 86, 91–96, 100, 106–108, 113–115, 118, 121, 122, 129, 130, 138, 139, 144, 150, 153, 154, 156, 163, 167, 168, 174, 180, 181, 184, 197, 201, 207, 209–211, 217, 222, 234, 243, 245, 248, 264, 268, 277, 280–283, 285, 288, 290, 296, 297, 299, 305, 315]).

### *Stellungnahme 10: Klasse II – Regel-/Spätbehandlung – Störungen der Atmung*

**Eine kieferorthopädische Regel-/Spätbehandlung im späten Wechselgebiss bzw. permanenten Gebiss kann bei einer Klasse-II-Anomalie im Vergleich zu einer nichtdurchgeführten kieferorthopädischen Behandlung positive Auswirkungen auf Störungen der Atmung („airway space“) erreichen (Konsens 19/0/1, LoE 2+; [40, 82, 121, 160, 184, 237, 293, 305]).**

### *Empfehlung 11: Idealer Behandlungszeitpunkt der Klasse-II-Anomalie*

**Die Therapie einer ausgeprägten skelettalen bzw. dentalen Klasse-II-Anomalie kann frühzeitig begonnen werden, v. a. um das Risiko für ein dentales Frontzahntrauma zu reduzieren bzw. wenn patientenindividuelle Faktoren dies sinnvoll erscheinen lassen.**

**Bei einer moderaten Klasse-II-Anomalie kann eine Therapie im späten Wechselgebiss bevorzugt vor bzw. während dem pubertären Wachstumsgipfel erfolgen, da zu diesem Zeitpunkt die zu erwartenden skelettalen Therapieeffekte maximal sind.**

**Bei Behandlungen jenseits des Wachstumsschubes scheinen zunehmend dentoalveoläre Therapieeffekte die Behandlung zu dominieren, die in individuellen Fällen auch erwünscht sein können**

(starker Konsens 20/0/0, LoE 1++, 0 – schwache Empfehlung; [26, 36, 100, 106, 132, 205, 217, 230, 241, 253, 254, 269, 270, 287, 303]).

*Stellungnahme 12: Klasse III – Frühbehandlung – skelettale, dentoalveoläre und ästhetische Verbesserungen*

**Eine kieferorthopädische Frühbehandlung im Milch- bzw. frühen Wechselgebiss führt – je nach beabsichtigter Therapie – bei einer Klasse-III-Anomalie im Vergleich zu einer nicht durchgeführten kieferorthopädischen Behandlung zu**

- 1. einer Verbesserung im Hinblick auf die skelettale Lagebeziehung von Oberkiefer und Unterkiefer,**
- 2. dentoalveolären Verbesserungen bezüglich Zahnstellung, Zahnbogenform bzw. kaufunktioneller Okklusion,**
- 3. Verbesserungen der dentofazialen Ästhetik bzw. des Weichteilprofils.**

**Darüber hinaus gibt es Hinweise, dass die maxilläre Protraktion die oberen Luftwege vergrößert.**

**Insgesamt scheint eine (interzeptive) kieferorthopädische Therapie, ggf. unterstützt durch eine skelettale Verankerung, in diesem Entwicklungsabschnitt besonders wirksam für die Korrektur einer skelettalen Klasse III zu sein**

(Konsens 18/1/0, LoE 1++; [3, 9, 11, 12, 18, 22, 24, 25, 27, 30, 32, 53, 59, 61, 64, 69, 71, 72, 85, 98, 99, 103, 111, 134, 135, 159, 165, 171, 175, 176, 182, 186, 188, 192, 198, 200, 215, 221, 229, 235, 239, 240, 250, 271–273, 278, 300–302, 304, 306, 307, 309, 310]).

*Stellungnahme 13: Klasse III – Regel-/Spätbehandlung – skelettale, dentoalveoläre und ästhetische Verbesserungen*

**Eine kieferorthopädische Behandlung im späten Wechselgebiss führt bei einer Klasse-III-Anomalie – je nach beabsichtigter Therapie – im Vergleich zu einer nicht durchgeführten kieferorthopädischen Behandlung zu**

1. einer Verbesserung im Hinblick auf die skelettale Lagebeziehung von Oberkiefer und Unterkiefer,
2. dentoalveolären Verbesserungen bezüglich Zahnstellung, Zahnbogenform bzw. kaufunktioneller Okklusion,
3. Verbesserungen der dentofazialen Ästhetik bzw. des Weichteilprofils

(Konsens 19/1/0, LoE 1++; [4, 28, 37, 38, 46, 66, 76, 84, 89, 98, 99, 104, 137, 161, 188, 192, 236, 260, 272, 276, 289, 291]).

*Stellungnahme 14: Klasse III – Regel-/Spätbehandlung – Störungen der Atmung*

**Eine kieferorthopädische Regel-/Spätbehandlung im späten Wechselgebiss bzw. permanenten Gebiss kann bei einer Klasse-III-Anomalie im Vergleich zu einer nicht durchgeführten kieferorthopädischen Behandlung positive Auswirkungen auf Störungen der Atmung (airway space) erreichen** (Konsens 18/0/1, LoE 2+; [55, 142, 158, 193, 289]).

*Stellungnahme 15: Klasse III – Spätbehandlung – Operative Bisslagekorrektur*

**Die kombiniert kieferorthopädisch-kieferchirurgische Korrektur einer Klasse-III-Malokklusion verbessert die Okklusion sowie die Gesichtsästhetik. Die Kombinationsbehandlung kann zudem das psychosoziale Befinden verbessern. Zusätzlich gibt es Hinweise, dass die Mastikation verbessert werden kann** (Konsens 19/0/1, LoE 2++; [5, 145, 157, 279, 314]).

*Empfehlung 16: Idealer Behandlungszeitpunkt der Klasse-III-Anomalie*

**Die Therapie einer skelettalen bzw. dentalen Klasse-III-Anomalie sollte frühzeitig, zum Beispiel in der frühen Wechselgebissphase, begonnen werden. Zudem gibt es Hinweise, dass bei einer Klasse-III-Anomalie eine frühe Behandlung die Notwendigkeit eines operativen Eingriffs zur Korrektur der Anomalie reduziert** (starker Konsens 19/0/0, LoE 1+, B – moderate Empfehlung; [25, 27, 29, 98, 99, 175, 272, 278, 301, 308]).

*Stellungnahme 17: Transversale Anomalien – Frühbehandlung – skelettale und dentoalveoläre Verbesserungen und Verbesserung der Atmung*

**Eine kieferorthopädische Frühbehandlung im Milch- bzw. frühen Wechselgebiss führt – je nach beabsichtigter Therapie – bei einer transversalen Anomalie im Vergleich zu einer nicht durchgeführten kieferorthopädischen Behandlung zu**

- 1. einer Verbesserung im Hinblick auf die skelettale Lagebeziehung von Oberkiefer und Unterkiefer,**
- 2. dentoalveolären Verbesserungen bezüglich Zahnstellung, Zahnbogenform bzw. kaufunktioneller Okklusion.**

**Darüber hinaus gibt es Hinweise, dass die maxilläre Expansion die oberen Luftwege vergrößert (Konsens 19/1/0, LoE 1++; [6, 48, 68, 83, 105, 110, 116, 162, 194, 195, 223, 262, 266, 312]).**

*Stellungnahme 18: Transversale Anomalien – Regel-/Spätbehandlung – skelettale und dentoalveoläre Verbesserungen und Verbesserung der Atmung*

**Eine kieferorthopädische Regel-/Spätbehandlung im späten Wechselgebiss bzw. permanenten Gebiss führt – je nach beabsichtigter Therapie – bei einer transversalen Anomalie im Vergleich zu einer nicht durchgeführten kieferorthopädischen Behandlung zu**

- 1. einer Verbesserung im Hinblick auf die skelettale Lagebeziehung von Oberkiefer und Unterkiefer,**
- 2. dentoalveolären Verbesserungen bezüglich Zahnstellung, Zahnbogenform bzw. kaufunktioneller Okklusion.**

**Darüber hinaus gibt es Hinweise, dass die maxilläre Expansion die oberen Luftwege vergrößert (Konsens 19/1/0, LoE 1++; [1, 23, 41, 43, 48, 97, 275, 312]).**

*Empfehlung 19: Idealer Behandlungszeitpunkt transversaler Anomalien*

**Die Therapie einer ausgeprägten skelettalen bzw. dentalen transversalen Anomalie sollte im Oberkiefer frühzeitig begonnen werden, um bei jungen Patienten die hohe Adaptivität der maxillären Strukturen auszunutzen, muskulären Fehlfunktionen entgegenzuwirken und eine koordinierte transversale und sagittale Weiterentwicklung der Kiefer zu ermöglichen** (starker Konsens 20/0/0, LoE 2++, B – moderate Empfehlung; [23, 43]).

## **Schlussfolgerungen**

Die S3-Leitlinie konnte zeigen, dass Kieferorthopädie anomaliebezogen auf verschiedensten Ebenen (skelettale und dentoalveoläre Effekte, psychoemotionale Effekte und Lebensqualität, präventive Effekte, z. B. hinsichtlich Frontzahntrauma) einen für den Patienten relevanten medizinischen Nutzen haben kann.

Im Hinblick auf die idealen Behandlungszeitpunkte zeigte sich, dass Anomalien der Klasse II eine heterogene Gruppe innerhalb der Kieferorthopädie sind und zu unterschiedlichen Behandlungszeitpunkten unterschiedlich behandelt werden können. Vor allem bei sehr ausgeprägten Fehlstellungen und einer vergrößerten sagittalen Frontzahnstufe (Overjet) erscheint ein frühzeitiges Eingreifen wegen der anschließenden Traumagefahr der oberen Schneidezähne sinnvoll. Ansonsten haben Klasse-II-Anomalien das Potenzial, in der späten Wechselgebissphase und auch im frühen bleibenden Gebiss effektiv behandelt zu werden. Bei einem Eingriff jenseits des pubertären Wachstumsgipfels gibt es noch vielversprechende Möglichkeiten der dentoalveolären Korrektur mit festsitzenden Klasse-II-Therapien, wobei skelettale Therapieeffekte immer geringer werden. In bestimmten Fällen kann auch eine Camouflage-Therapie der Klasse II in Betracht gezogen werden. Nach abgeschlossenem Wachstum besteht insbesondere bei extraoralen Abweichungen oder aufgrund der Komplexität des Behandlungsfalls (z. B. zusätzliche skelettale Abweichungen in anderen Raumebenen) auch die Möglichkeit einer operativen Korrektur der Bisslage – eine rein dentoalveoläre Korrektur würde in diesen Fällen möglicherweise den biologischen Spielraum der erforderlichen Zahnbewegungen überschreiten.

Anomalien der Klasse III sind ebenfalls eine heterogene Gruppe und können zu unterschiedlichen Behandlungszeiten unterschiedlich behandelt werden. Die Behandlungsmöglichkeiten im Wechselgebiss reichen von einfachen Maßnahmen der dentoalveolären Korrektur, zum Beispiel Korrektur eines frontalen Kreuzbisses, und interzeptiven Maßnahmen zur abgestimmten Weiterentwicklung der Kiefer bis hin zu



skelettalen kieferorthopädischen Maßnahmen zur Beeinflussung von Ober- und Unterkieferwachstum. Es gibt Hinweise, dass sowohl dentoalveoläre als auch skelettale Maßnahmen frühzeitig begonnen werden sollten, z. B. im frühen Wechselgebiss, um das Potenzial für einen positiven Wachstumseinfluss insbesondere im Oberkiefer voll ausschöpfen zu können. Aktivierungsprotokolle wie Alt-RAMEC („alternate rapid maxillary expansion and constriction“) können, ggf. mit skelettalen Verankerungstechniken, das therapeutische Spektrum im frühen und späten Wechselgebiss effektiv erweitern.

Aber auch über den optimalen Behandlungszeitpunkt hinaus kann die Kieferorthopädie einen wichtigen Beitrag leisten: In Fällen mit gering ausgeprägten Malokklusionen kann ein dentoalveolärer Ausgleich erwogen werden, und bei Patienten mit ausgeprägten skelettalen Fehlstellungen des Kiefers kann eine kombiniert kieferorthopädisch-kieferchirurgische Korrektur nach Wachstumsabschluss erfolgreich durchgeführt werden.

Es gibt zudem einige Hinweise, dass die Therapie einer ausgeprägten skelettalen oder dentalen transversalen Anomalie frühzeitig im Oberkiefer begonnen werden sollte, um die hohe Adaptivität der Oberkieferstrukturen beim jungen Patienten zu nutzen, muskulären Fehlfunktionen entgegenzuwirken und eine koordinierte weitere transversale und sagittale Kieferentwicklung zu ermöglichen.

## **Danksagung**

Die Autoren danken allen beteiligten wissenschaftlichen Gesellschaften und ihren Mandatsträgern für ihre Unterstützung sowie allen Personen, die an der Literaturrecherche und Einstufung der Evidenz und Studienqualität teilgenommen und diese durchgeführt haben. Weiterhin danken die Autoren Herrn Dr. rer. nat. Helge Knüttel von der Universitätsbibliothek Regensburg für seine Unterstützung bei der Durchführung der systematischen Literaturrecherche. Die Originalversion dieser Leitlinie wurde von der AWMF unter dem Titel „Ideale Behandlungszeitpunkte kieferorthopädischer Anomalien“ im Dezember 2021 herausgegeben, AWMF-Registriernummer: 083-038, <https://www.awmf.org/leitlinien/detail/ll/083-038.html>.

## **Finanzierung**

Diese Leitlinie wurde von der Deutschen Gesellschaft für Kieferorthopädie (DGKFO), der Deutschen Gesellschaft für Zahn-, Mund- und Kieferheilkunde (DGZMK), der

Bundeszahnärztekammer (BZÄK) und der Kassenzahnärztlichen Bundesvereinigung (KZBV) im Rahmen des Programms „Task Force Qualität“ gefördert.

## Interessenkonflikt

Zu Beginn und am Ende des Entwicklungsprozesses der Leitlinie mussten alle Mitglieder Offenlegungserklärungen für potenzielle Interessenkonflikte abgeben. Die Autoren und Mandatsträger der Leitlinie melden keine finanziellen oder sonstigen Interessenkonflikte in Bezug auf diesen Artikel, der geistiges Eigentum der Autoren ist.

## Abbildungslegenden

**Abb. 1.** PRISMA(Preferred Reporting Items for Systematic Review and Meta-Analysis)-Flussdiagramm zur Identifizierung und Auswahl geeigneter Studien. **a** Systematische Hauptliteraturrecherche, **b** systematische Literaturrecherche für Querschnittsstudien

## References

1. Abdalla Y, Brown L, Sonnesen L (2019) Effects of rapid maxillary expansion on upper airway volume: A three-dimensional cone-beam computed tomography study. *Angle Orthodontist* 019. doi: 10.2319/101218-738.1
2. Abrahamsson C (2013) Masticatory function and temporomandibular disorders in patients with dentofacial deformities. *Swedish Dental Journal Supplement*(231): 9–85
3. Abu Alhaija ES, Richardson A (1999) Long-term effect of the chincap on hard and soft tissues. *Eur. J. Orthodont.* 21(3): 291–298
4. Abu Alhaija, Elham S. J., Al-Khateeb SN (2011) Skeletal, dental and soft tissue changes in Class III patients treated with fixed appliances and lower premolar extractions. *Aust. Orthod. J.* 27(1): 40–45
5. Agirnasligil MO, Amuk NG, Kilic E et al. (2019) The changes of self-esteem, sensitivity to criticism, and social appearance anxiety in orthognathic surgery patients: A controlled study. *Am. J. Orthod. Dentofac. Orthop.* 155(4): 482-+. doi: 10.1016/j.ajodo.2018.05.019
6. Agostino P, Ugolini A, Signori A et al. (2014) Orthodontic treatment for posterior crossbites. [Review]. *Cochrane Database of Systematic Reviews* 014(8): CD000979. doi: 10.1002/14651858.CD000979.pub2
7. Agou S, Locker D, Muirhead V et al. (2011) Does psychological well-being influence oral-health-related quality of life reports in children receiving orthodontic treatment? *American Journal of Orthodontics & Dentofacial Orthopedics* 139(3): 369–377. doi: 10.1016/j.ajodo.2009.05.034

8. Alali OH (2014) A prospective controlled evaluation of Class II division 1 malocclusions treated with fixed lingual mandibular growth modifier. *Angle Orthodontist* 84(3): 527–533. doi: 10.2319/070913-500.1
9. Alarcon JA, Bastir M, Rosas A et al. (2011) Chincup treatment modifies the mandibular shape in children with prognathism. *American Journal of Orthodontics & Dentofacial Orthopedics* 140(1): 38–43. doi: 10.1016/j.ajodo.2009.10.046
10. Al-Jewair TS, Preston CB, Moll EM et al. (2012) A comparison of the MARA and the AdvanSync functional appliances in the treatment of Class II malocclusion. *Angle Orthodontist* 82(5): 907–914. doi: 10.2319/090411-569.1
11. Al-Khalifa HN, Hashem MI, Alanazi KJ et al. (2017) Orthopedic Effect of Chin Cup during Mixed Dentition Stage. *Journal of Contemporary Dental Practice [Electronic Resource]* 18(5): 410–414
12. Allen RA, Connolly IH, Richardson A (1993) Early treatment of Class III incisor relationship using the chincap appliance. *European Journal of Orthodontics* 15(5): 371–376
13. de Almeida, Henriques JF, Almeida RR de et al. (2005) Short-term treatment effects produced by the Herbst appliance in the mixed dentition. *Angle Orthodontist* 75(4): 540–547. doi: 10.1043/0003-3219(2005)75[540:STEPBT]2.0.CO
14. Almeida-Pedrin RR, Almeida MR, Almeida RR et al. (2007) Treatment effects of headgear biteplane and bionator appliances. *American Journal of Orthodontics & Dentofacial Orthopedics* 132(2): 191–198
15. Altug-Atac AT, Erdem D (2007) Effects of three-dimensional bimetric maxillary distalizing arches and cervical headgear on dentofacial structures. *European Journal of Orthodontics* 29(1): 52–59
16. Andiappan M, Gao W, Bernabe E et al. (2015) Malocclusion, orthodontic treatment, and the Oral Health Impact Profile (OHIP-14): Systematic review and meta-analysis. [Review]. *Angle Orthodontist* 85(3): 493–500. doi: 10.2319/051414-348.1
17. Angelieri F, Franchi L, Cevidanes LH et al. (2014) Long-term treatment effects of the FR-2 appliance: a prospective evaluation 7 years post-treatment. *European Journal of Orthodontics* 36(2): 192–199. doi: 10.1093/ejo/cjt026
18. Anne, Mandall, N, Cousley R, DiBiase A et al. (2012) Is early Class III protraction facemask treatment effective? A multicentre, randomized, controlled trial: 3-year follow-up. *Journal of Orthodontics* 39(3): 176–185. doi: 10.1179/1465312512Z.000000000028
19. Anthony SN, Zimba K, Subramanian B (2018) Impact of Malocclusions on the Oral Health-Related Quality of Life of Early Adolescents in Ndola, Zambia. *International Journal of Dentistry* 2018: 7920973. doi: 10.1155/2018/7920973
20. Arraj GP, Rossi-Fedele G, Dođramacı EJ (2019) The association of overjet size and traumatic dental injuries-A systematic review and meta-analysis. *Dental Traumatology* 35(4-5): 217–232. doi: 10.1111/edt.12481
21. Atik E, Gorucu-Coskuner H, Kocadereli I (2017) Dentoskeletal and airway effects of the X-Bow appliance versus removable functional appliances (Frankel-2 and Trainer) in prepubertal Class II division 1 malocclusion patients. *Aust. Orthod. J.* 33(1): 3–13

22. Baccetti T, De Clerck HJ, Cevidanes LH et al. (2011) Morphometric analysis of treatment effects of bone-anchored maxillary protraction in growing Class III patients. *European Journal of Orthodontics* 33(2): 121–125. doi: 10.1093/ejo/cjq170
23. Baccetti T, Franchi L, Cameron CG et al. (2001) Treatment timing for rapid maxillary expansion. *Angle Orthod.* 71(5): 343–350
24. Baccetti T, Franchi L, McNamara JA, Jr (1999) Thin-plate spline analysis of treatment effects of rapid maxillary expansion and face mask therapy in early Class III malocclusions. *European Journal of Orthodontics* 21(3): 275–281
25. Baccetti T, Franchi L, McNamara JA, Jr (2000) Treatment and posttreatment craniofacial changes after rapid maxillary expansion and facemask therapy. *American Journal of Orthodontics & Dentofacial Orthopedics* 118(4): 404–413
26. Baccetti T, Franchi L, Toth LR et al. (2000) Treatment timing for Twin-block therapy. *American Journal of Orthodontics & Dentofacial Orthopedics* 118(2): 159–170
27. Baccetti T, McGill JS, Franchi L et al. (1998) Skeletal effects of early treatment of Class III malocclusion with maxillary expansion and face-mask therapy. *American Journal of Orthodontics & Dentofacial Orthopedics* 113(3): 333–343
28. Baccetti T, Rey D, Oberti G et al. (2009) Long-term outcomes of Class III treatment with mandibular cervical headgear followed by fixed appliances. *Angle Orthodontist* 79(5): 828–834. doi: 10.2319/111408-580.1
29. Baccetti T, Tollaro I (1998) A retrospective comparison of functional appliance treatment of Class III malocclusions in the deciduous and mixed dentitions. *European Journal of Orthodontics* 20(3): 309–317
30. Baik HS, Jee SH, Lee KJ et al. (2004) Treatment effects of Frankel functional regulator III in children with class III malocclusions. *American Journal of Orthodontics & Dentofacial Orthopedics* 125(3): 294–301
31. Baram D, Yang Y, Ren C et al. (2019) Orthodontic Treatment Need and the Psychosocial Impact of Malocclusion in 12-Year-Old Hong Kong Children. *TheScientificWorldJournal* 2019: 2685437. doi: 10.1155/2019/2685437
32. Barrett AA, Baccetti T, McNamara JA, Jr (2010) Treatment effects of the light-force chincup. *American Journal of Orthodontics & Dentofacial Orthopedics* 138(4): 468–476. doi: 10.1016/j.ajodo.2008.12.024
33. Basciftci FA, Uysal T, Buyukerkmen A et al. (2003) The effects of activator treatment on the craniofacial structures of Class II division 1 patients. *European Journal of Orthodontics* 25(1): 87–93
34. Bassarelli T, Franchi L, Defraia E et al. (2016) Dentoskeletal effects produced by a Jasper Jumper with an anterior bite plane. *Angle Orthodontist* 86(5): 775–781. doi: 10.2319/110115-737.1
35. Bates CJ, McDonald JP (2005) The relationship between severity of obstructive sleep apnoea/hypopnoea syndrome (OSAHS) and lateral cephalometric radiograph values: a clinical diagnostic tool. *Surg. J. R. Coll. Surg. Edinb. Irel.* 3(5): 338–346. doi: 10.1016/s1479-666x(05)80113-1

36. Batista KB, Thiruvengkatachari B, Harrison JE et al. (2018) Orthodontic treatment for prominent upper front teeth (Class II malocclusion) in children and adolescents. [Review]. *Cochrane Database of Systematic Reviews* 3: CD003452. doi: 10.1002/14651858.CD003452.pub4
37. Battagel JM, Orton HS (1991) Class III malocclusion: a comparison of extraction and non-extraction techniques. *European Journal of Orthodontics* 13(3): 212–222
38. Battagel JM, Orton HS (1995) A comparative study of the effects of customized facemask therapy or headgear to the lower arch on the developing Class III face. *European Journal of Orthodontics* 17(6): 467–482
39. Bauss O, Freitag S, Röhling J et al. (2008) Influence of overjet and lip coverage on the prevalence and severity of incisor trauma. *J. Orofac. Orthop.* 69(6): 402–410. doi: 10.1007/s00056-008-8805-1
40. Bavbek NC, Tuncer BB, Turkoz C et al. (2016) Changes in airway dimensions and hyoid bone position following class II correction with forsus fatigue resistant device. *Clin. Oral Investig.* 20(7): 1747–1755. doi: 10.1007/s00784-015-1659-1
41. Baysal A, Ozturk MA, Sahan AO et al. (2016) Facial soft-tissue changes after rapid maxillary expansion analyzed with 3-dimensional stereophotogrammetry: A randomized, controlled clinical trial. *Angle Orthodontist* 86(6): 934–942
42. Bernabe E, Sheiham A, Tsakos G et al. (2008) The impact of orthodontic treatment on the quality of life in adolescents: a case-control study. *European Journal of Orthodontics* 30(5): 515–520. doi: 10.1093/ejo/cjn026
43. Bicakci AA, Agar U, Sokucu O et al. (2005) Nasal airway changes due to rapid maxillary expansion timing. *Angle Orthodontist* 75(1): 1–6
44. Bilbo EE, Marshall SD, Southard KA et al. (2018) Long-term skeletal effects of high-pull headgear followed by fixed appliances for the treatment of Class II malocclusions. *Angle Orthodontist* 88(5): 530–537. doi: 10.2319/091517-620.1
45. Borzabadi-Farahani A, Borzabadi-Farahani A (2011) The association between orthodontic treatment need and maxillary incisor trauma, a retrospective clinical study. *Oral Surg. Oral Med. Oral Pathol. Oral Radiol. Endod.* 112(6): e75-80. doi: 10.1016/j.tripleo.2011.05.024
46. Borzabadi-Farahani A, Lane CJ, Yen SL (2014) Late maxillary protraction in patients with unilateral cleft lip and palate: a retrospective study. *Cleft Palate Craniofacial Journal* 51(1): e1-e10. doi: 10.1597/12-099
47. Bourdiol P, Soulier-Peigue D, Lachaze P et al. (2017) Only severe malocclusion correlates with mastication deficiency. *Arch. Oral Biol.* 75: 14–20. doi: 10.1016/j.archoralbio.2016.12.002
48. Bucci R, Montanaro D, Rongo R et al. (2019) Effects of maxillary expansion on the upper airways: Evidence from systematic reviews and meta-analyses. [Review]. *Journal of Oral Rehabilitation* 46(4): 377–387. doi: 10.1111/joor.12766
49. Burden DJ (1995) An investigation of the association between overjet size, lip coverage, and traumatic injury to maxillary incisors. *Eur. J. Orthodont.* 17(6): 513–517. doi: 10.1093/ejo/17.6.513

50. Buyuknacar GB, Gulec A (2020) Correlation between the cephalometric measurements and acoustic properties of /s/ sound in Turkish. *J. Appl. Oral Sci.* 28: e20190399. doi: 10.1590/1678-7757-2019-0399
51. Cacciatore G, Ghislanzoni LT, Alvetto L et al. (2014) Treatment and posttreatment effects induced by the Forsus appliance: A controlled clinical study. *Angle Orthodontist* 84(6): 1010–1017. doi: 10.2319/112613-867.1
52. Chadwick SM, Aird JC, Taylor PJ et al. (2001) Functional regulator treatment of Class II division 1 malocclusions. *Eur. J. Orthodont.* 23(5): 495–505. doi: 10.1093/ejo/23.5.495
53. Chatzoudi MI, Ioannidou-Marathiotou I, Papadopoulos MA (2014) Clinical effectiveness of chin cup treatment for the management of Class III malocclusion in pre-pubertal patients: a systematic review and meta-analysis. [Review]. *Progress in Orthodontics* 15: 62. doi: 10.1186/s40510-014-0062-9
54. Chen DR, McGorray SP, Dolce C et al. (2011) Effect of early Class II treatment on the incidence of incisor trauma. *American Journal of Orthodontics & Dentofacial Orthopedics* 140(4): e155-60. doi: 10.1016/j.ajodo.2011.02.023
55. Chen X, Liu D, Liu J et al. (2015) Three-Dimensional Evaluation of the Upper Airway Morphological Changes in Growing Patients with Skeletal Class III Malocclusion Treated by Protraction Headgear and Rapid Palatal Expansion: A Comparative Research. *PLoS ONE [Electronic Resource]* 10(8): e0135273. doi: 10.1371/journal.pone.0135273
56. Chiqueto K, Henriques JF, Barros SE et al. (2013) Angle Class II correction with MARA appliance. *Dental Press Journal of Orthodontics* 18(1): 35–44
57. Choi T-H, Kim B-I, Chung CJ et al. (2015) Assessment of masticatory function in patients with non-sagittal occlusal discrepancies. *J. Oral Rehabil.* 42(1): 2–9. doi: 10.1111/joor.12227
58. Cochrane Deutschland Stiftung, Institut für Evidenz in der Medizin, Institut für Medizinische Biometrie und Statistik, Freiburg et al. (2019) Manual systematische Recherche für Evidenzsynthesen und Leitlinien, Version 2.0
59. Cordasco G, Matarese G, Rustico L et al. (2014) Efficacy of orthopedic treatment with protraction facemask on skeletal Class III malocclusion: a systematic review and meta-analysis. [Review]. *Orthodontics & Craniofacial Research* 17(3): 133–143. doi: 10.1111/ocr.12040
60. Corrêa-Faria P, Martins CC, Bönecker M et al. (2016) Clinical factors and socio-demographic characteristics associated with dental trauma in children: a systematic review and meta-analysis. *Dent Traumatol* 32(5): 367–378. doi: 10.1111/edt.12268
61. Cozza P, Baccetti T, Mucedero M et al. (2010) Treatment and posttreatment effects of a facial mask combined with a bite-block appliance in Class III malocclusion. *American Journal of Orthodontics & Dentofacial Orthopedics* 138(3): 300–310. doi: 10.1016/j.ajodo.2010.05.001
62. Cozza P, De Toffol L, Colagrossi S (2004) Dentoskeletal effects and facial profile changes during activator therapy. *European Journal of Orthodontics* 26(3): 293–302

63. Croft RS, Buschang PH, English JD et al. (1999) A cephalometric and tomographic evaluation of Herbst treatment in the mixed dentition. *American Journal of Orthodontics & Dentofacial Orthopedics* 116(4): 435–443
64. Danaei SM, Ajami S, Etemadi H et al. (2018) Assessment of the effect of maxillary protraction appliance on pharyngeal airway dimensions in relation to changes in tongue posture. *Dental Research Journal* 15(3): 208–214
65. de,Almeida,MR, Flores-Mir C, Brandao AG et al. (2008) Soft tissue changes produced by a banded-type Herbst appliance in late mixed dentition patients. *World Journal of Orthodontics* 9(2): 121–131
66. De,Clerck,H, Cevidanes L, Baccetti T (2010) Dentofacial effects of bone-anchored maxillary protraction: a controlled study of consecutively treated Class III patients. *American Journal of Orthodontics & Dentofacial Orthopedics* 138(5): 577–581. doi: 10.1016/j.ajodo.2009.10.037
67. de,Oliveira,CM, Sheiham A (2004) Orthodontic treatment and its impact on oral health-related quality of life in Brazilian adolescents. *Journal of Orthodontics* 31(1): 20-7; discussion 15
68. Defraia E, Marinelli A, Baroni G et al. (2008) Dentoskeletal effects of a removable appliance for expansion of the maxillary arch: a postero-anterior cephalometric study. *European Journal of Orthodontics* 30(1): 57–60
69. Deguchi T, McNamara JA (1999) Craniofacial adaptations induced by chin cup therapy in Class III patients. *American Journal of Orthodontics & Dentofacial Orthopedics* 115(2): 175–182
70. Dimberg L, Arnrup K, Bondemark L (2015) The impact of malocclusion on the quality of life among children and adolescents: a systematic review of quantitative studies. [Review]. *European Journal of Orthodontics* 37(3): 238–247. doi: 10.1093/ejo/cju046
71. Dogan S (2012) The effects of face mask therapy in cleft lip and palate patients. *Annals of Maxillofacial Surgery* 2(2): 116–120. doi: 10.4103/2231-0746.101332
72. Dorri M (2015) In children with prominent lower front teeth (class III malocclusion), how does orthodontic treatment affect outcomes? *Cochrane Clinical Answers*. doi: 10.1002/cca.996
73. Doshi UH, Bhad-Patil WA (2011) Speech defect and orthodontics: a contemporary review. *Orthodontics : The Art and Practice of Dentofacial Enhancement* 12(4): 340–353
74. Duarte-Rodrigues L, Ramos-Jorge ML, Alves-Duarte AC et al. (2020) Oral disorders associated with the experience of verbal bullying among Brazilian school-aged children: A case-control study. *Journal of the American Dental Association* 151(6): 399–406. doi: 10.1016/j.adaj.2020.02.001
75. Ehmer U, Tulloch CJ, Proffit WR et al. (1999) An international comparison of early treatment of angle Class-II/1 cases. Skeletal effects of the first phase of a prospective clinical trial. *Journal of Orofacial Orthopedics* 60(6): 392–408
76. Eissa O, ElShennawy M, Gaballah S et al. (2018) Treatment of Class III malocclusion using miniscrew-anchored inverted Forsus FRD: Controlled clinical trial. *Angle Orthodontist* 88(6): 692–701. doi: 10.2319/110717-760.1

77. Eissa O, El-Shennawy M, Gaballah S et al. (2017) Treatment outcomes of Class II malocclusion cases treated with miniscrew-anchored Forsus Fatigue Resistant Device: A randomized controlled trial. *Angle Orthodontist* 87(6): 824–833. doi: 10.2319/032717-214.1
78. Elfeky HY, Fayed MS, AlHammadi MS et al. (2018) Three-dimensional skeletal, dentoalveolar and temporomandibular joint changes produced by Twin Block functional appliance. *J. Orofac. Orthop.* 79(4): 245–258. doi: 10.1007/s00056-018-0137-1
79. ElKordy SA, Abouelezz AM, Fayed MM et al. (2016) Three-dimensional effects of the mini-implant-anchored Forsus Fatigue Resistant Device: A randomized controlled trial. *Angle Orthodontist* 86(2): 292–305. doi: 10.2319/012515-55.1
80. ElKordy SA, Abouelezz AM, Fayed MM et al. (2019) Evaluation of the miniplate-anchored Forsus Fatigue Resistant Device in skeletal Class II growing subjects: A randomized controlled trial. *Angle Orthodontist* 89(3): 391–403. doi: 10.2319/062018-468.1
81. English JD, Buschang PH, Throckmorton GS (2002) Does malocclusion affect masticatory performance? *Angle Orthod.* 72(1): 21–27. doi: 10.1043/0003-3219(2002)072<0021:DMAMP>2.0.CO;2
82. Entrenas I, Gonzalez-Chamorro E, Alvarez-Abad C et al. (2019) Evaluation of changes in the upper airway after Twin Block treatment in patients with Class II malocclusion. *Clinical & Experimental Dental Research* 5(3): 259–268. doi: 10.1002/cre2.180
83. Erdinc AE, Ugur T, Erbay E (1999) A comparison of different treatment techniques for posterior crossbite in the mixed dentition. *Am. J. Orthod. Dentofac. Orthop.* 116(3): 287–300. doi: 10.1016/S0889-5406(99)70240-4
84. Faco R, Yatabe M, Cevitanes LH et al. (2019) Bone-anchored maxillary protraction in unilateral cleft lip and palate: a cephalometric appraisal. *European Journal of Orthodontics* 019. doi: 10.1093/ejo/cjz005
85. Falck F, Zimmermann-Menzel K (2008) Cephalometric changes in the treatment of Class III using the Frankel appliance. *J. Orofac. Orthop.* 69(2): 99–109. doi: 10.1007/s00056-008-0716-7
86. Faltin KJ, Faltin RM, Baccetti T et al. (2003) Long-term effectiveness and treatment timing for Bionator therapy. *Angle Orthodontist* 73(3): 221–230
87. Farronato G, Giannini L, Riva R et al. (2012) Correlations between malocclusions and dyslalias. *European Journal of Paediatric Dentistry* 13(1): 13–18
88. Feldens CA, Borges TS, Vargas-Ferreira F et al. (2016) Risk factors for traumatic dental injuries in the primary dentition: concepts, interpretation, and evidence. *Dental Traumatology* 32(6): 429–437. doi: 10.1111/edt.12281
89. Feng X, Li J, Li Y et al. (2012) Effectiveness of TAD-anchored maxillary protraction in late mixed dentition A systematic review. *Angle Orthod.* 82(6): 1107–1114. doi: 10.2319/111411-705.1
90. Ferrando-Magraner E, Garcia-Sanz V, Bellot-Arcis C et al. (2019) Oral health-related quality of life of adolescents after orthodontic treatment. A systematic review. [Review]. *Journal of Clinical & Experimental Dentistry* 11(2): e194-e202. doi: 10.4317/jced.55527



91. Firouz M, Zernik J, Nanda R (1992) Dental and orthopedic effects of high-pull headgear in treatment of Class II, division 1 malocclusion. *American Journal of Orthodontics & Dentofacial Orthopedics* 102(3): 197–205
92. Flores-Mir C, Ayeh A, Goswami A et al. (2007) Skeletal and dental changes in Class II division 1 malocclusions treated with splint-type Herbst appliances. A systematic review. [Review] [36 refs]. *Angle Orthodontist* 77(2): 376–381
93. Flores-Mir C, Barnett G, Higgins DW et al. (2009) Short-term skeletal and dental effects of the Xbow appliance as measured on lateral cephalograms. *American Journal of Orthodontics & Dentofacial Orthopedics* 136(6): 822–832. doi: 10.1016/j.ajodo.2008.01.021
94. Flores-Mir C, Major MP, Major PW (2006) Soft tissue changes with fixed functional appliances in Class II division 1. [Review] [46 refs]. *Angle Orthodontist* 76(4): 712–720
95. Flores-Mir C, Major PW (2006) Cephalometric facial soft tissue changes with the twin block appliance in Class II division 1 malocclusion patients. A systematic review. [Review] [39 refs]. *Angle Orthodontist* 76(5): 876–881
96. Franchi L, Alvetro L, Giuntini V et al. (2011) Effectiveness of comprehensive fixed appliance treatment used with the Forsus Fatigue Resistant Device in Class II patients. *Angle Orthodontist* 81(4): 678–683. doi: 10.2319/102710-629.1
97. Franchi L, Baccetti T, Cameron CG et al. (2002) Thin-plate spline analysis of the short- and long-term effects of rapid maxillary expansion. *Eur. J. Orthodont.* 24(2): 143–150. doi: 10.1093/ejo/24.2.143
98. Franchi L, Baccetti T, McNamara JA (2004) Postpubertal assessment of treatment timing for maxillary expansion and protraction therapy followed by fixed appliances. *American Journal of Orthodontics & Dentofacial Orthopedics* 126(5): 555–568
99. Franchi L, Baccetti T, McNamara,JA,Jr (1998) Shape-coordinate analysis of skeletal changes induced by rapid maxillary expansion and facial mask therapy. *American Journal of Orthodontics & Dentofacial Orthopedics* 114(4): 418–426
100. Franchi L, Pavoni C, Faltin,K,Jr et al. (2013) Long-term skeletal and dental effects and treatment timing for functional appliances in Class II malocclusion. *Angle Orthodontist* 83(2): 334–340. doi: 10.2319/052912-450.1
101. Freeman DC, McNamara,JA,Jr, Baccetti T et al. (2009) Long-term treatment effects of the FR-2 appliance of Frankel. *American Journal of Orthodontics & Dentofacial Orthopedics* 135(5): 570.e1-6; discussion 570-1. doi: 10.1016/j.ajodo.2007.11.029
102. Gameiro GH, Magalhaes IB, Szymanski MM et al. (2017) Is the main goal of mastication achieved after orthodontic treatment? A prospective longitudinal study. *Dental Press Journal of Orthodontics* 22(3): 72–78. doi: 10.1590/2177-6709.22.3.072-078.oar
103. Garattini G, Levrini L, Crozzoli P et al. (1998) Skeletal and dental modifications produced by the Bionator III appliance. *Am. J. Orthod. Dentofac. Orthop.* 114(1): 40–44. doi: 10.1016/S0889-5406(98)70235-5

104. Gencer D, Kaygisiz E, Yuksel S et al. (2015) Comparison of double-plate appliance/facemask combination and facemask therapy in treating class III malocclusions. *Angle Orthodontist* 85(2): 278–283. doi: 10.2319/013114-83.1
105. Geran RG, McNamara,JA,Jr, Baccetti T et al. (2006) A prospective long-term study on the effects of rapid maxillary expansion in the early mixed dentition. *American Journal of Orthodontics & Dentofacial Orthopedics* 129(5): 631–640
106. Ghislanzoni LT, Baccetti T, Toll D et al. (2013) Treatment timing of MARA and fixed appliance therapy of Class II malocclusion. *European Journal of Orthodontics* 35(3): 394–400. doi: 10.1093/ejo/cjs023
107. Ghislanzoni LT, Toll DE, Defraia E et al. (2011) Treatment and posttreatment outcomes induced by the Mandibular Advancement Repositioning Appliance; a controlled clinical study. *Angle Orthodontist* 81(4): 684–691. doi: 10.2319/111010-656.1
108. Giuntini V, Vangelisti A, Masucci C et al. (2015) Treatment effects produced by the Twin-block appliance vs the Forsus Fatigue Resistant Device in growing Class II patients. *Angle Orthodontist* 85(5): 784–789. doi: 10.2319/090514-624.1
109. Glasl B, Ludwig B, Schopf P (2006) Prevalence and development of KIG-relevant symptoms in primary school students from Frankfurt am Main. *Journal of Orofacial Orthopedics* 67(6): 414–423
110. Godoy F, Godoy-Bezerra J, Rosenblatt A (2011) Treatment of posterior crossbite comparing 2 appliances: a community-based trial. *American Journal of Orthodontics & Dentofacial Orthopedics* 139(1): e45-52. doi: 10.1016/j.ajodo.2010.06.017
111. Goyenc Y, Ersoy S (2004) The effect of a modified reverse headgear force applied with a facebow on the dentofacial structures. *European Journal of Orthodontics* 26(1): 51–57
112. Guest SS, McNamara,JA,Jr, Baccetti T et al. (2010) Improving Class II malocclusion as a side-effect of rapid maxillary expansion: a prospective clinical study. *American Journal of Orthodontics & Dentofacial Orthopedics* 138(5): 582–591. doi: 10.1016/j.ajodo.2008.12.026
113. Guimaraes,CH,Jr, Henriques JF, Janson G et al. (2013) Prospective study of dentoskeletal changes in Class II division malocclusion treatment with twin force bite corrector. *Angle Orthodontist* 83(2): 319–326. doi: 10.2319/042312-339.1
114. Hanoun A, Al-Jewair TS, Tabbaa S et al. (2014) A comparison of the treatment effects of the Forsus Fatigue Resistance Device and the Twin Block appliance in patients with class II malocclusions. *Clinical Cosmetic & Investigational Dentistry* 6: 57–63. doi: 10.2147/CCIDE.S64119
115. Hansson C, Skold B, Linder-Aronson S (1997) Treatment of adolescents with Hansaplate/headgear. Influence on face in profile and on dentition. *Journal of Orofacial Orthopedics* 58(1): 16–29
116. Harrison JE, Ashby D (2001) Orthodontic treatment for posterior crossbites. [Review] [43 refs]. *Cochrane Database of Systematic Reviews*(1): CD000979
117. Hassan AH, Amin H-S (2010) Association of orthodontic treatment needs and oral health-related quality of life in young adults. *American Journal of Orthodontics & Dentofacial Orthopedics* 137(1): 42–47. doi: 10.1016/j.ajodo.2008.02.024

118. Heinrichs DA, Shammaa I, Martin C et al. (2014) Treatment effects of a fixed intermaxillary device to correct class II malocclusions in growing patients. *Progress in Orthodontics* 15: 45. doi: 10.1186/s40510-014-0045-x
119. Helm S, Kreiborg S, Solow B (1985) Psychosocial implications of malocclusion: a 15-year follow-up study in 30-year-old Danes. *American Journal of Orthodontics* 87(2): 110–118. doi: 10.1016/0002-9416(85)90020-x
120. Huynh NT, Morton PD, Rompré PH et al. (2011) Associations between sleep-disordered breathing symptoms and facial and dental morphometry, assessed with screening examinations. *American Journal of Orthodontics & Dentofacial Orthopedics* 140(6): 762–770. doi: 10.1016/j.ajodo.2011.03.023
121. Iwasaki T, Takemoto Y, Inada E et al. (2014) Three-dimensional cone-beam computed tomography analysis of enlargement of the pharyngeal airway by the Herbst appliance. *Am. J. Orthod. Dentofac. Orthop.* 146(6): 776–785. doi: 10.1016/j.ajodo.2014.08.017
122. Jakobsone G, Latkauskiene D, McNamara Jr JA (2013) Mechanisms of Class II correction induced by the crown Herbst appliance as a single-phase Class II therapy: 1 year follow-up. *Progress in Orthodontics* 14(1). doi: 10.1186/2196-1042-14-27
123. Jamilian A, Kiaee B, Sanayei S et al. (2016) Orthodontic Treatment of Malocclusion and its Impact on Oral Health-Related Quality of Life. *The open dentistry journal* 10: 236–241. doi: 10.2174/1874210601610010236
124. Janson GR, daSilva,CC, Bergersen EO et al. (2000) Eruption Guidance Appliance effects in the treatment of Class II, Division 1 malocclusions. *American Journal of Orthodontics & Dentofacial Orthopedics* 117(2): 119–129
125. Janson GR, Toruno JL, Martins DR et al. (2003) Class II treatment effects of the Frankel appliance. *European Journal of Orthodontics* 25(3): 301–309
126. Järvinen S (1978) Incisal overjet and traumatic injuries to upper permanent incisors. A retrospective study. *Acta Odontologica Scandinavica* 36(6): 359–362. doi: 10.3109/00016357809029088
127. Järvinen S (1979) Traumatic injuries to upper permanent incisors related to age and incisal overjet. A retrospective study. *Acta Odontologica Scandinavica* 37(6): 335–338. doi: 10.3109/00016357909004705
128. Javid H, Vettore M, Benson PE (2017) Does orthodontic treatment before the age of 18 years improve oral health-related quality of life? A systematic review and meta-analysis. *Am. J. Orthod. Dentofac. Orthop.* 151(4): 644–655. doi: 10.1016/j.ajodo.2016.12.011
129. Jena AK, Duggal R (2010) Treatment Effects of Twin-Block and Mandibular Protraction Appliance-IV in the Correction of Class II Malocclusion. *Angle Orthod.* 80(3): 485–491. doi: 10.2319/062709-359.1
130. Jena AK, Duggal R, Parkash H (2006) Skeletal and dentoalveolar effects of Twin-block and bionator appliances in the treatment of Class II malocclusion: a comparative study. *American Journal of Orthodontics & Dentofacial Orthopedics* 130(5): 594–602
131. Johnson NC, Sandy JR (1999) Tooth position and speech--is there a relationship? *Angle Orthodontist* 69(4): 306–310. doi: 10.1043/0003-3219(1999)069<0306:TPASIT>2.3.CO;2

132. Julku J, Pirila-Parkkinen K, Pirttiniemi P (2018) Airway and hard tissue dimensions in children treated with early and later timed cervical headgear-a randomized controlled trial. *European Journal of Orthodontics* 40(3): 285–295. doi: 10.1093/ejo/cjx088
133. Jung M-H (2010) Evaluation of the effects of malocclusion and orthodontic treatment on self-esteem in an adolescent population. *American Journal of Orthodontics & Dentofacial Orthopedics* 138(2): 160–166. doi: 10.1016/j.ajodo.2008.08.040
134. Kajiyama K, Murakami T, Suzuki A (2000) Evaluation of the modified maxillary protractor applied to Class III malocclusion with retruded maxilla in early mixed dentition. *American Journal of Orthodontics & Dentofacial Orthopedics* 118(5): 549–559
135. Kajiyama K, Murakami T, Suzuki A (2004) Comparison of orthodontic and orthopedic effects of a modified maxillary protractor between deciduous and early mixed dentitions. *American Journal of Orthodontics & Dentofacial Orthopedics* 126(1): 23–32
136. Kaluza S, Hiller K-A, Proff P et al. (2019) Draft search strategies for "Relapse in orthognathic surgery: a systematic review and meta-analysis". Universität Regensburg
137. Kama JD, Ozer T, Baran S (2006) Orthodontic and orthopaedic changes associated with treatment in subjects with Class III malocclusions. *European Journal of Orthodontics* 28(5): 496–502
138. Kamal AT, Fida M (2019) Evaluation of cervical spine posture after functional therapy with twin-block appliances: A retrospective cohort study. *Am. J. Orthod. Dentofac. Orthop.* 155(5): 656–661. doi: 10.1016/j.ajodo.2018.06.012
139. Kang Y, Franchi L, Manton DJ et al. (2018) A cephalometric study of the skeletal and dento-alveolar effects of the modified Louisiana State University activator in Class II malocclusion. *Eur. J. Orthodont.* 40(2): 164–175. doi: 10.1093/ejo/cjx044
140. Kania MJ, Keeling SD, McGorray SP et al. (1996) Risk factors associated with incisor injury in elementary school children. *Angle Orthod.* 66(6): 423–432. doi: 10.1043/0003-3219(1996)066<0423:RFAWII>2.3.CO;2
141. Khosravanifard B, Ghanbari-Azarnir S, Rakhshan H et al. (2012) Association between orthodontic treatment need and masticatory performance. *Orthodontics : The Art and Practice of Dentofacial Enhancement* 13(1): e20-8
142. Kilinc AS, Arslan SG, Kama JD et al. (2008) Effects on the sagittal pharyngeal dimensions of protraction and rapid palatal expansion in Class III malocclusion subjects. *European Journal of Orthodontics* 30(1): 61–66
143. Kim Y-J, Hong J-S, Hwang Y-I et al. (2010) Three-dimensional analysis of pharyngeal airway in preadolescent children with different anteroposterior skeletal patterns. *American Journal of Orthodontics & Dentofacial Orthopedics* 137(3): 306.e1-11; discussion 306-7. doi: 10.1016/j.ajodo.2009.10.025
144. Kim-Berman H, McNamara,JA,Jr, Lints JP et al. (2019) Treatment effects of the Carriere Motion 3DTM appliance for the correction of Class II malocclusion in adolescents. *Angle Orthodontist* 019. doi: 10.2319/121418-872.1
145. Kobayashi T, Honma K, Nakajima T et al. (1993) Masticatory function in patients with mandibular prognathism before and after orthognathic surgery. *Journal of Oral &*

Maxillofacial Surgery 51(9): 997-1001; discussion 1002-3. doi: 10.1016/s0278-2391(10)80043-6

146. Kobayashi T, Honma K, Shingaki S et al. (2001) Changes in masticatory function after orthognathic treatment in patients with mandibular prognathism. *Br. J. Oral Maxillofac. Surg.* 39(4): 260–265. doi: 10.1054/bjom.2000.0576
147. Koike S, Sujino T, Ohmori H et al. (2013) Gastric emptying rate in subjects with malocclusion examined by (13) C breath test. *J. Oral Rehabil.* 40(8): 574–581. doi: 10.1111/joor.12073
148. Kragt L, Dharmo B, Wolvius EB et al. (2016) The impact of malocclusions on oral health-related quality of life in children-a systematic review and meta-analysis. *Clin. Oral Investig.* 20(8): 1881–1894. doi: 10.1007/s00784-015-1681-3
149. Kragt L, Jaddoe V, Wolvius E et al. (2017) The association of subjective orthodontic treatment need with oral health-related quality of life. *Community Dentist. Oral Epidemiol.* 45(4): 365–371. doi: 10.1111/cdoe.12299
150. Kucukkeles N, Ilhan I, Orgun IA (2007) Treatment efficiency in skeletal Class II patients treated with the jasper jumper. *Angle Orthodontist* 77(3): 449–456
151. Kunz F, Platte P, Keß S et al. (2018) Correlation between oral health-related quality of life and orthodontic treatment need in children and adolescents-a prospective interdisciplinary multicentre cohort study (Zusammenhang zwischen mundgesundheitsbezogener Lebensqualität und kieferorthopädischem Behandlungsbedarf bei Kindern und Jugendlichen – Eine prospektive, interdisziplinäre und multizentrische Kohortenstudie). *Journal of Orofacial Orthopedics* 79(5): 297–308. doi: 10.1007/s00056-018-0142-4
152. Kunz F, Platte P, Keß S et al. (2019) Auswirkungen spezifischer kieferorthopädischer Parameter auf die mundgesundheitsbezogene Lebensqualität von Kindern und Jugendlichen : Eine prospektive, interdisziplinäre und multizentrische Kohortenstudie (Impact of specific orthodontic parameters on the oral health-related quality of life in children and adolescents : A prospective interdisciplinary, multicentre, cohort study). *J Orofac Orthop* 80(4): 174–183. doi: 10.1007/s00056-019-00181-x
153. LaHaye MB, Buschang PH, Alexander RG et al. (2006) Orthodontic treatment changes of chin position in Class II Division 1 patients. *American Journal of Orthodontics & Dentofacial Orthopedics* 130(6): 732–741
154. Lange DW, Kalra V, Broadbent, BH, Jr et al. (1995) Changes in soft tissue profile following treatment with the bionator. *Angle Orthodontist* 65(6): 423–430
155. Laranjo F, Pinho T (2014) Cephalometric study of the upper airways and dentoalveolar height in open bite patients. *International Orthodontics* 12(4): 467–482. doi: 10.1016/j.ortho.2014.10.005
156. Latkauskiene D, Jakobsone G (2012) Immediate post-treatment crowned Herbst effects in growing patients. *Stomatologija* 14(3): 89–92
157. Lee D-H, Yu H-S (2012) Masseter muscle changes following orthognathic surgery A long-term three-dimensional computed tomography follow-up. *Angle Orthod.* 82(5): 792–798. doi: 10.2319/111911-717.1

158. Lee W-C, Tu Y-K, Huang C-S et al. (2018) Pharyngeal airway changes following maxillary expansion or protraction: A meta-analysis. *Orthod. Craniofac. Res.* 21(1): 4–11. doi: 10.1111/ocr.12208
159. Levin AS, McNamara,JA,Jr, Franchi L et al. (2008) Short-term and long-term treatment outcomes with the FR-3 appliance of Frankel. *American Journal of Orthodontics & Dentofacial Orthopedics* 134(4): 513–524. doi: 10.1016/j.ajodo.2006.10.036
160. Li L, Liu H, Cheng H et al. (2014) CBCT evaluation of the upper airway morphological changes in growing patients of class II division 1 malocclusion with mandibular retrusion using twin block appliance: a comparative research. *PLoS ONE [Electronic Resource]* 9(4): e94378. doi: 10.1371/journal.pone.0094378
161. Lin HC, Chang HP, Chang HF (2007) Treatment effects of occipitontal anchorage appliance of maxillary protraction combined with chincup traction in children with Class III malocclusion. *Journal of the Formosan Medical Association* 106(5): 380–391
162. Lippold C, Stamm T, Meyer U et al. (2013) Early treatment of posterior crossbite--a randomised clinical trial. *Trials [Electronic Resource]* 14: 20. doi: 10.1186/1745-6215-14-20
163. Lisson JA, Mokrys K, Kinzinger GS et al. (2013) Changes in soft-tissue profiles after treatment of class II/1 patients with bite-jumping appliances. *Journal of Orofacial Orthopedics* 74(2): 113–123. doi: 10.1007/s00056-012-0128-6
164. Liu Z, McGrath C, Hägg U (2009) The impact of malocclusion/orthodontic treatment need on the quality of life. A systematic review. *Angle Orthodontist* 79(3): 585–591. doi: 10.2319/042108-224.1
165. Liu ZP, Li CJ, Hu HK et al. (2011) Efficacy of short-term chincup therapy for mandibular growth retardation in Class III malocclusion. [Review]. *Angle Orthodontist* 81(1): 162–168. doi: 10.2319/050510-244.1
166. Lombardo G, Vena F, Negri P et al. (2020) Worldwide prevalence of malocclusion in the different stages of dentition: A systematic review and meta-analysis. *Eur. J. Paediatr. Dent.* 21(2): 115–122. doi: 10.23804/ejpd.2020.21.02.05
167. Lucchese A, Carinci F, Brunelli G (2012) SKELETAL EFFECTS INDUCED BY TWIN BLOCK IN THERAPY OF CLASS II MALOCCLUSION. *Eur. J. Inflamm.* 10(1): 83–87
168. Lund DI, Sandler PJ (1998) The effects of Twin Blocks: a prospective controlled study. *American Journal of Orthodontics & Dentofacial Orthopedics* 113(1): 104–110
169. Lux CJ, Ducker B, Pritsch M et al. (2009) Occlusal status and prevalence of occlusal malocclusion traits among 9-year-old schoolchildren. *Eur. J. Orthodont.* 31(3): 294–299. doi: 10.1093/ejo/cjn116
170. Lux CJ, Rubel J, Starke J et al. (2001) Effects of early activator treatment in patients with class II malocclusion evaluated by thin-plate spline analysis. *Angle Orthodontist* 71(2): 120–126
171. Macdonald KE, Kapust AJ, Turley PK (1999) Cephalometric changes after the correction of Class III malocclusion with maxillary expansion facemask therapy. *Am. J. Orthod. Dentofac. Orthop.* 116(1): 13–24. doi: 10.1016/S0889-5406(99)70298-2

172. Magalhães IB, Pereira LJ, Marques LS et al. (2010) The influence of malocclusion on masticatory performance. A systematic review. *Angle Orthodontist* 80(5): 981–987. doi: 10.2319/011910-33.1
173. Magno MB, Nadelman P, Leite, Karla Lorene de França et al. (2020) Associations and risk factors for dental trauma: A systematic review of systematic reviews. *Community Dentist. Oral Epidemiol.* doi: 10.1111/cdoe.12574
174. Malta LA, Baccetti T, Franchi L et al. (2010) Long-term dentoskeletal effects and facial profile changes induced by bionator therapy. *Angle Orthodontist* 80(1): 10–17. doi: 10.2319/031609-156.1
175. Mandall N, Cousley R, DiBiase A et al. (2016) Early class III protraction facemask treatment reduces the need for orthognathic surgery: a multi-centre, two-arm parallel randomized, controlled trial. *Journal of Orthodontics* 43(3): 164–175. doi: 10.1080/14653125.2016.1201302
176. Mandall N, DiBiase A, Littlewood S et al. (2010) Is early Class III protraction facemask treatment effective? A multicentre, randomized, controlled trial: 15-month follow-up. *Journal of Orthodontics* 37(3): 149–161. doi: 10.1179/14653121043056
177. Mandall NA, McCord JF, Blinkhorn AS et al. (2000) Perceived aesthetic impact of malocclusion and oral self-perceptions in 14-15-year-old Asian and Caucasian children in greater Manchester. *European Journal of Orthodontics* 22(2): 175–183
178. Mantysaari R, Kantomaa T, Pirttiniemi P et al. (2004) The effects of early headgear treatment on dental arches and craniofacial morphology: a report of a 2 year randomized study. *European Journal of Orthodontics* 26(1): 59–64
179. Marquezin MCS, Kobayashi FY, Montes ABM et al. (2013) Assessment of masticatory performance, bite force, orthodontic treatment need and orofacial dysfunction in children and adolescents. *Arch. Oral Biol.* 58(3): 286–292. doi: 10.1016/j.archoralbio.2012.06.018
180. Marsico E, Gatto E, Burrascano M et al. (2011) Effectiveness of orthodontic treatment with functional appliances on mandibular growth in the short term. [Review]. *American Journal of Orthodontics & Dentofacial Orthopedics* 139(1): 24–36. doi: 10.1016/j.ajodo.2010.04.028
181. Martina R, Cioffi I, Galeotti A et al. (2013) Efficacy of the Sander bite-jumping appliance in growing patients with mandibular retrusion: a randomized controlled trial. *Orthodontics & Craniofacial Research* 16(2): 116–126. doi: 10.1111/ocr.12013
182. Martina R, D'Anto V, De, Simone, V et al. (2019) Cephalometric outcomes of a new orthopaedic appliance for Class III malocclusion treatment. *European Journal of Orthodontics* 019. doi: 10.1093/ejo/cjz037
183. Masood M, Masood Y, Newton T (2014) Cross-bite and oral health related quality of life in young people. *J. Dent.* 42(3): 249–255. doi: 10.1016/j.jdent.2013.12.004
184. Maspero C, Giannini L, Galbiati G et al. (2015) Upper airway obstruction in class II patients. Effects of Andresen activator on the anatomy of pharyngeal airway passage. Cone beam evaluation. *Stomatologija* 17(4): 124–130

185. Maspero C, Prevedello C, Giannini L et al. (2014) Atypical swallowing: a review. *Minerva Stomatologica* 63(6): 217–227
186. Masucci C, Franchi L, Giuntini V et al. (2014) Short-term effects of a modified Alt-RAMEC protocol for early treatment of Class III malocclusion: a controlled study. *Orthodontics & Craniofacial Research* 17(4): 259–269. doi: 10.1111/ocr.12051
187. McNamara,JA,Jr, Sigler LM, Franchi L et al. (2010) Changes in occlusal relationships in mixed dentition patients treated with rapid maxillary expansion. A prospective clinical study. *Angle Orthodontist* 80(2): 230–238. doi: 10.2319/040309-192.1
188. Merwin D, Ngan P, Hagg U et al. (1997) Timing for effective application of anteriorly directed orthopedic force to the maxilla. *American Journal of Orthodontics & Dentofacial Orthopedics* 112(3): 292–299
189. Millett DT, Cunningham SJ, O'Brien KD et al. (2018) Orthodontic treatment for deep bite and retroclined upper front teeth in children. [Review]. *Cochrane Database of Systematic Reviews* 2: CD005972. doi: 10.1002/14651858.CD005972.pub4
190. Mills CM, McCulloch KJ (1998) Treatment effects of the twin block appliance: A cephalometric study. *Am. J. Orthod. Dentofac. Orthop.* 114(1): 15–24. doi: 10.1016/S0889-5406(98)70232-X
191. Mills CM, McCulloch KJ (2000) Posttreatment changes after successful correction of Class II malocclusions with the twin block appliance. *American Journal of Orthodontics & Dentofacial Orthopedics* 118(1): 24–33
192. Minase RA, Bhad WA, Doshi UH (2019) Effectiveness of reverse twin block with lip pads-RME and face mask with RME in the early treatment of class III malocclusion. *Progress in Orthodontics* 20(1): 14. doi: 10.1186/s40510-019-0266-0
193. Ming Y, Hu Y, Li Y et al. (2018) Effects of maxillary protraction appliances on airway dimensions in growing class III maxillary retrognathic patients: A systematic review and meta-analysis. [Review]. *International Journal of Pediatric Otorhinolaryngology* 105: 138–145. doi: 10.1016/j.ijporl.2017.12.013
194. Mutinelli S, Cozzani M (2015) Rapid maxillary expansion in early-mixed dentition: effectiveness of increasing arch dimension with anchorage on deciduous teeth. *European Journal of Paediatric Dentistry* 16(2): 115–122
195. Mutinelli S, Manfredi M, Guiducci A et al. (2015) Anchorage onto deciduous teeth: effectiveness of early rapid maxillary expansion in increasing dental arch dimension and improving anterior crowding. *Progress in Orthodontics* 16: 22. doi: 10.1186/s40510-015-0093-x
196. Muto T, Yamazaki A, Takeda S (2008) A cephalometric evaluation of the pharyngeal airway space in patients with mandibular retrognathia and prognathia, and normal subjects. *Int. J. Oral Maxillofac. Surg.* 37(3): 228–231. doi: 10.1016/j.ijom.2007.06.020
197. Nalbantgil D, Arun T, Sayinsu K et al. (2005) Skeletal, dental and soft-tissue changes induced by the Jasper Jumper appliance in late adolescence. *Angle Orthodontist* 75(3): 426–436
198. Ngan P, Yiu C, Hu A et al. (1998) Cephalometric and occlusal changes following maxillary expansion and protraction. *European Journal of Orthodontics* 20(3): 237–254



199. Nguyen QV, Bezemer PD, Habets L et al. (1999) A systematic review of the relationship between overjet size and traumatic dental injuries. *Eur. J. Orthodont.* 21(5): 503–515. doi: 10.1093/ejo/21.5.503
200. Nienkemper M, Wilmes B, Franchi L et al. (2015) Effectiveness of maxillary protraction using a hybrid hyrax-facemask combination: a controlled clinical study. *Angle Orthodontist* 85(5): 764–770. doi: 10.2319/071614-497.1
201. Nucera R, Lo, Giudice, A, Rustico L et al. (2016) Effectiveness of orthodontic treatment with functional appliances on maxillary growth in the short term: A systematic review and meta-analysis. [Review]. *American Journal of Orthodontics & Dentofacial Orthopedics* 149(5): 600-611.e3. doi: 10.1016/j.ajodo.2015.09.030
202. O'Brien K, Macfarlane T, Wright J et al. (2009) Early treatment for Class II malocclusion and perceived improvements in facial profile. *American Journal of Orthodontics & Dentofacial Orthopedics* 135(5): 580–585. doi: 10.1016/j.ajodo.2008.02.020
203. O'Brien K, Wright J, Conboy F et al. (2003) Effectiveness of early orthodontic treatment with the Twin-block appliance: a multicenter, randomized, controlled trial. Part 1: Dental and skeletal effects. *American Journal of Orthodontics & Dentofacial Orthopedics* 124(3): 234-43; quiz 339
204. O'Brien K, Wright J, Conboy F et al. (2003) Effectiveness of early orthodontic treatment with the Twin-block appliance: a multicenter, randomized, controlled trial. Part 2: Psychosocial effects. *American Journal of Orthodontics & Dentofacial Orthopedics* 124(5): 488-94; discussion 494-5
205. Oh H, Baumrind S, Korn EL et al. (2017) A retrospective study of Class II mixed-dentition treatment. *Angle Orthodontist* 87(1): 56–67. doi: 10.2319/012616-72.1
206. Oz U, Orhan K, Rubenduz M (2013) Two-dimensional lateral cephalometric evaluation of varying types of Class II subgroups on posterior airway space in postadolescent girls: a pilot study. *Journal of Orofacial Orthopedics* 74(1): 18–27. doi: 10.1007/s00056-012-0121-0
207. Oztoprak MO, Nalbantgil D, Uyanlar A et al. (2012) A cephalometric comparative study of class II correction with Sabbagh Universal Spring (SUS(2)) and Forsus FRD appliances. *European journal of dentistry* 6(3): 302–310
208. Palomares NB, Celeste RK, Oliveira BH et al. (2012) How does orthodontic treatment affect young adults' oral health-related quality of life? *American Journal of Orthodontics & Dentofacial Orthopedics* 141(6): 751–758. doi: 10.1016/j.ajodo.2012.01.015
209. Pancherz H (1979) Treatment of class II malocclusions by jumping the bite with the Herbst appliance. A cephalometric investigation. *American Journal of Orthodontics* 76(4): 423–442
210. Pancherz H (1982) The mechanism of Class II correction in Herbst appliance treatment. A cephalometric investigation. *American Journal of Orthodontics* 82(2): 104–113
211. Pangrazio MNK, Pangrazio-Kulbersh V, Berger JL et al. (2012) Treatment effects of the mandibular anterior repositioning appliance in patients with Class II skeletal malocclusions. *Angle Orthod.* 82(6): 971–977. doi: 10.2319/120511-748.1

212. Papadopoulos MA, Melkos AB, Athanasiou AE (2010) Noncompliance maxillary molar distalization with the first class appliance: a randomized controlled trial. *American Journal of Orthodontics & Dentofacial Orthopedics* 137(5): 586.e1-586.e13; discussion 586-7. doi: 10.1016/j.ajodo.2009.10.033
213. Papageorgiou SN, Kutschera E, Memmert S et al. (2017) Effectiveness of early orthopaedic treatment with headgear: a systematic review and meta-analysis. [Review]. *European Journal of Orthodontics* 39(2): 176–187. doi: 10.1093/ejo/cjw041
214. Pavoni C, Cretella, Lombardo, E, Lione R et al. (2017) Orthopaedic treatment effects of functional therapy on the sagittal pharyngeal dimensions in subjects with sleep-disordered breathing and Class II malocclusion. *Acta Otorhinolaryngologica Italica* 37(6): 479–485. doi: 10.14639/0392-100X-1420
215. Pavoni C, Gazzani F, Franchi L et al. (2019) Soft tissue facial profile in Class III malocclusion: long-term post-pubertal effects produced by the Face Mask Protocol. *European Journal of Orthodontics* 019. doi: 10.1093/ejo/cjz003
216. Pavoni C, Lombardo EC, Franchi L et al. (2017) Treatment and post-treatment effects of functional therapy on the sagittal pharyngeal dimensions in Class II subjects. *Int. J. Pediatr. Otorhinolaryngol.* 101: 47–50. doi: 10.1016/j.ijporl.2017.07.032
217. Pavoni C, Lombardo EC, Lione R et al. (2018) Treatment timing for functional jaw orthopaedics followed by fixed appliances: a controlled long-term study. *European Journal of Orthodontics* 40(4): 430–436. doi: 10.1093/ejo/cjx078
218. Peres KG, Barros AJD, Anselmi L et al. (2008) Does malocclusion influence the adolescent's satisfaction with appearance? A cross-sectional study nested in a Brazilian birth cohort. *Community Dentist. Oral Epidemiol.* 36(2): 137–143. doi: 10.1111/j.1600-0528.2007.00382.x
219. Perillo L, Castaldo MI, Cannavale R et al. (2011) Evaluation of long-term effects in patients treated with Frankel-2 appliance. *European Journal of Paediatric Dentistry* 12(4): 261–266
220. Perillo L, Johnston, LE, Jr, Ferro A (1996) Permanence of skeletal changes after function regulator (FR-2) treatment of patients with retrusive Class II malocclusions. *American Journal of Orthodontics & Dentofacial Orthopedics* 109(2): 132–139
221. Perillo L, Vitale M, Masucci C et al. (2016) Comparisons of two protocols for the early treatment of Class III dentoskeletal disharmony. *European Journal of Orthodontics* 38(1): 51–56
222. Perinetti G, Primožic J, Franchi L et al. (2015) Treatment Effects of Removable Functional Appliances in Pre-Pubertal and Pubertal Class II Patients: A Systematic Review and Meta-Analysis of Controlled Studies. [Review]. *PLoS ONE [Electronic Resource]* 10(10): e0141198. doi: 10.1371/journal.pone.0141198
223. Petren S, Bondemark L (2008) Correction of unilateral posterior crossbite in the mixed dentition: a randomized controlled trial. *American Journal of Orthodontics & Dentofacial Orthopedics* 133(6): 790.e7-13. doi: 10.1016/j.ajodo.2007.11.021
224. Petti S (2015) Over two hundred million injuries to anterior teeth attributable to large overjet: a meta-analysis. *Dental Traumatology* 31(1): 1–8. doi: 10.1111/edt.12126

225. Petti S, Tarsitani G (1996) Traumatic injuries to anterior teeth in Italian schoolchildren: prevalence and risk factors. *Endod. Dent. Traumatol.* 12(6): 294–297. doi: 10.1111/j.1600-9657.1996.tb00530.x
226. Piassi E, Antunes LS, Antunes LA (2016) Orthodontic treatment reduces the impact on children and adolescents' oral health-related quality of life. [Review]. *Indian Journal of Dental Research* 27(2): 213–219. doi: 10.4103/0970-9290.183122
227. Piassi E, Antunes LS, Graça TCA et al. (2019) The Impact of Mixed Dentition Malocclusion on the Oral Health-Related Quality of Life for Children and Their Families: A Case-Control Study. *J. Clin. Pediatr. Dent.* 43(3): 211–217. doi: 10.17796/1053-4625-43.3.12
228. Pirilä-Parkkinen K, Pirttiniemi P, Nieminen P et al. (2009) Dental arch morphology in children with sleep-disordered breathing. *Eur. J. Orthodont.* 31(2): 160–167. doi: 10.1093/ejo/cjn061
229. Pithon MM, Santos NL, Santos CR et al. (2016) Is alternate rapid maxillary expansion and constriction an effective protocol in the treatment of Class III malocclusion? A systematic review. *Dental Press Journal of Orthodontics* 21(6): 34–42. doi: 10.1590/2177-6709.21.6.034-042.oar
230. Pontes LF, Maia FA, Almeida MR et al. (2017) Mandibular Protraction Appliance Effects in Class II Malocclusion in Children, Adolescents and Young Adults. *Brazilian Dental Journal* 28(2): 225–233. doi: 10.1590/0103-6440201701032
231. Prado RF, Ramos-Jorge J, Marques LS et al. (2016) Prospective evaluation of the psychosocial impact of the first 6 months of orthodontic treatment with fixed appliance among young adults. *Angle Orthodontist* 86(4): 644–648. doi: 10.2319/063015-434.1
232. Primo-Miranda EF, Ramos-Jorge ML, Homem MA et al. (2019) Association between occlusal characteristics and the occurrence of dental trauma in preschool children: a case-control study. *Dental Traumatology* 35(2): 95–100. doi: 10.1111/edt.12457
233. Quintao C, Helena I, Brunharo VP et al. (2006) Soft tissue facial profile changes following functional appliance therapy. *European Journal of Orthodontics* 28(1): 35–41
234. Raveli TB, Raveli DB, Gandini LG et al. (2017) Dental skeletal effects of the metallic splinted Herbst appliance after growth spurt: a lateral oblique cephalometric assessment. *Acta Odontologica Latinoamericana* 30(2): 76–82
235. Ren Y, Steegman R, Dieters A et al. (2019) Bone-anchored maxillary protraction in patients with unilateral complete cleft lip and palate and Class III malocclusion. *Clinical Oral Investigations* 23(5): 2429–2441. doi: 10.1007/s00784-018-2627-3
236. Rey D, Angel D, Oberti G et al. (2008) Treatment and posttreatment effects of mandibular cervical headgear followed by fixed appliances in Class III malocclusion. *American Journal of Orthodontics & Dentofacial Orthopedics* 133(3): 371-8; quiz 476.e1. doi: 10.1016/j.ajodo.2006.04.043
237. Rizk S, Kulbersh VP, Al-Qawasmi R (2016) Changes in the oropharyngeal airway of Class II patients treated with the mandibular anterior repositioning appliance. *Angle Orthodontist* 86(6): 955–961

238. Rodrigues,de,Almeida,M, Castanha,Henriques,JF, Rodrigues,de,Almeida,R et al. (2002) Treatment effects produced by Frankel appliance in patients with class II, division 1 malocclusion. *Angle Orthodontist* 72(5): 418–425
239. Rodriguez,de,Guzman-Barrera,J, Saez,Martinez,C, Boronat-Catala M et al. (2017) Effectiveness of interceptive treatment of class III malocclusions with skeletal anchorage: A systematic review and meta-analysis. *PLoS ONE [Electronic Resource]* 12(3): e0173875. doi: 10.1371/journal.pone.0173875
240. Rongo R, D'Anto V, Bucci R et al. (2017) Skeletal and dental effects of Class III orthopaedic treatment: a systematic review and meta-analysis. [Review]. *Journal of Oral Rehabilitation* 44(7): 545–562. doi: 10.1111/joor.12495
241. Ruf S, Pancherz H (1999) Dentoskeletal effects and facial profile changes in young adults treated with the Herbst appliance. *Angle Orthodontist* 69(3): 239–246
242. Ryan V, Chris AM, Dischinger T et al. (2006) Treatment effects of the edgewise Herbst appliance: A cephalometric and tomographic investigation. *Am. J. Orthod. Dentofac. Orthop.* 130(5): 582–593. doi: 10.1016/j.ajodo.2005.01.030
243. Saikoski LZ, Cancado RH, Valarelli FP et al. (2014) Dentoskeletal effects of Class II malocclusion treatment with the Twin Block appliance in a Brazilian sample: a prospective study. *Dental Press Journal of Orthodontics* 19(1): 36–45
244. Sambataro S, Fastuca R, Oppermann NJ et al. (2017) Cephalometric changes in growing patients with increased vertical dimension treated with cervical headgear. *Journal of Orofacial Orthopedics* 78(4): 312–320. doi: 10.1007/s00056-017-0087-z
245. Santamaria-Villegas A, Manrique-Hernandez R, Alvarez-Varela E et al. (2017) Effect of removable functional appliances on mandibular length in patients with class II with retrognathism: systematic review and meta-analysis. [Review]. *BMC Oral Health* 17(1): 52. doi: 10.1186/s12903-017-0339-8
246. Sauer C, Schlüter B, Hinz R et al. (2012) Childhood obstructive sleep apnea syndrome: an interdisciplinary approach: a prospective epidemiological study of 4,318 five-and-a-half-year-old children. *Journal of Orofacial Orthopedics* 73(5): 342–358. doi: 10.1007/s00056-012-0096-x
247. Schatz J-P, Hakeberg M, Ostini E et al. (2013) Prevalence of traumatic injuries to permanent dentition and its association with overjet in a Swiss child population. *Dental Traumatology* 29(2): 110–114. doi: 10.1111/j.1600-9657.2012.01150.x
248. Schiavon,Gandini,MR, Gandini,LG,Jr, Da,Rosa,Martins,JC et al. (2001) Effects of cervical headgear and edgewise appliances on growing patients. *American Journal of Orthodontics & Dentofacial Orthopedics* 119(5): 531-8; discussion 538-9
249. Schulz S, Koos B, Duske K et al. (2016) Skeletal effects in Angle Class II/1 patients treated with the functional regulator type II : Cephalometric and tensor analysis. *Journal of Orofacial Orthopedics* 77(6): 420–431
250. Seehra J, Fleming PS, Mandall N et al. (2012) A comparison of two different techniques for early correction of Class III malocclusion. *Angle Orthodontist* 82(1): 96–101. doi: 10.2319/032011-197.1

251. Seehra J, Fleming PS, Newton T et al. (2011) Bullying in orthodontic patients and its relationship to malocclusion, self-esteem and oral health-related quality of life. *Journal of Orthodontics* 38(4): 247-56; quiz 294. doi: 10.1179/14653121141641
252. Seehra J, Newton JT, DiBiase AT (2013) Interceptive orthodontic treatment in bullied adolescents and its impact on self-esteem and oral-health-related quality of life. *European Journal of Orthodontics* 35(5): 615–621. doi: 10.1093/ejo/cjs051
253. Sepanian VF, Sonnesen L (2018) Incisor root resorption in class II division 2 patients in relation to orthodontic treatment. *Eur. J. Orthodont.* 40(3): 337–342. doi: 10.1093/ejo/cjx086
254. Servello DF, Fallis DW, Alvetro L (2015) Analysis of Class II patients, successfully treated with the straight-wire and Forsus appliances, based on cervical vertebral maturation status. *Angle Orthodontist* 85(1): 80–86. doi: 10.2319/102513-780.1
255. Sideri S, Papageorgiou SN, Eliades T (2017) Are orthodontic systematic reviews registered a priori in PROSPERO? *Journal of Orthodontics* 44(4): 249–255. doi: 10.1080/14653125.2017.1370773
256. Sierwald I, John MT, Schierz O et al. (2015) Association of overjet and overbite with esthetic impairments of oral health-related quality of life. *J Orofac Orthop* 76(5): 405–420. doi: 10.1007/s00056-015-0300-x
257. Siluvai S, Kshetrimayum N, Reddy CVK et al. (2015) Malocclusion and related quality of life among 13- to 19-year-old students in Mysore City - a cross-sectional study. *Oral Health Prev. Dent.* 13(2): 135–141. doi: 10.3290/j.ohpd.a32339
258. Silvestrini-Biavati A, Alberti G, Silvestrini, Biavati, F et al. (2012) Early functional treatment in Class II division 1 subjects with mandibular retrognathia using Frankel II appliance. A prospective controlled study. *European Journal of Paediatric Dentistry* 13(4): 301–306
259. Silvola A-S, Närhi L, Tolvanen M et al. (2020) Gender-specific associations of malocclusion traits with oral health-related quality of life in a Finnish adult population. *Eur. J. Orthodont.* 42(3): 242–249. doi: 10.1093/ejo/cjz026
260. So LL (1996) Effects of reverse headgear treatment on sagittal correction in girls born with unilateral complete cleft lip and cleft palate--skeletal and dental changes. *American Journal of Orthodontics & Dentofacial Orthopedics* 109(2): 140–147
261. Soares TRC, Magno MB, Jural LA et al. (2018) Risk factors for traumatic dental injuries in the Brazilian population: A critical review. *Dental Traumatology* 34(6): 445–454. doi: 10.1111/edt.12439
262. Sollenius O, Golez A, Primožic J et al. (2019) Three-dimensional evaluation of forced unilateral posterior crossbite correction in the mixed dentition: a randomized controlled trial. *European Journal of Orthodontics* 019. doi: 10.1093/ejo/cjz054
263. Sonnesen L, Svensson P (2008) Temporomandibular disorders and psychological status in adult patients with a deep bite. *Eur. J. Orthodont.* 30(6): 621–629. doi: 10.1093/ejo/cjn044

264. Spalj S, Tranesen KM, Birkeland K et al. (2017) Comparison of Activator-Headgear and Twin Block Treatment Approaches in Class II Division 1 Malocclusion. *Biomed Res. Int.* doi: 10.1155/2017/4861924
265. Suzuki J, Shimazaki K, Koike S et al. (2018) Gastric emptying rate before and after orthodontic treatment examined with the [<sup>13</sup>C] breath test: A pilot study. *American Journal of Orthodontics & Dentofacial Orthopedics* 153(3): 347–354. doi: 10.1016/j.ajodo.2017.06.025
266. Tai K, Park JH, Mishima K et al. (2011) 3-Dimensional cone-beam computed tomography analysis of transverse changes with Schwarz appliances on both jaws. *Angle Orthodontist* 81(4): 670–677. doi: 10.2319/110910-655.1
267. Takemoto Y, Saitoh I, Iwasaki T et al. (2011) Pharyngeal airway in children with prognathism and normal occlusion. *Angle Orthodontist* 81(1): 75–80. doi: 10.2319/013010-65.1
268. Tepedino M, Della, Noce, MV, Ciavarella D et al. (2019) Soft-tissue changes after Class II malocclusion treatment using the Sander bite-jumping appliance: a retrospective study. *Minerva Stomatologica* 68(3): 118–125. doi: 10.23736/S0026-4970.19.04197-9
269. Thiruvengkatachari B, Harrison J, Worthington H et al. (2015) Early orthodontic treatment for Class II malocclusion reduces the chance of incisal trauma: Results of a Cochrane systematic review. [Review]. *American Journal of Orthodontics & Dentofacial Orthopedics* 148(1): 47–59. doi: 10.1016/j.ajodo.2015.01.030
270. Thiruvengkatachari B, Harrison JE, Worthington HV et al. (2013) Orthodontic treatment for prominent upper front teeth (Class II malocclusion) in children. [Review]. *Cochrane Database of Systematic Reviews* 013(11): CD003452. doi: 10.1002/14651858.CD003452.pub3
271. Tindlund RS, Rygh P (1993) Maxillary protraction: different effects on facial morphology in unilateral and bilateral cleft lip and palate patients. *Cleft Palate Craniofacial Journal* 30(2): 208–221
272. Toffol LD, Pavoni C, Baccetti T et al. (2008) Orthopedic treatment outcomes in Class III malocclusion. A systematic review. [Review] [40 refs]. *Angle Orthodontist* 78(3): 561–573. doi: 10.2319/030207-108.1
273. Tollaro I, Baccetti T, Franchi L (1996) Craniofacial changes induced by early functional treatment of Class III malocclusion. *American Journal of Orthodontics & Dentofacial Orthopedics* 109(3): 310–318
274. Toro A, Buschang PH, Throckmorton G et al. (2006) Masticatory performance in children and adolescents with Class I and II malocclusions. *Eur. J. Orthodont.* 28(2): 112–119. doi: 10.1093/ejo/cji080
275. Torre H, Alarcon J-A (2012) Changes in nasal air flow and school grades after rapid maxillary expansion in oral breathing children. *Med. Oral Patol. Oral Cir. Bucal* 17(5): E865-E870. doi: 10.4317/medoral.17810
276. Tortop T, Kaygisiz E, Gencer D et al. (2014) Modified tandem traction bow appliance compared with facemask therapy in treating Class III malocclusions. *Angle Orthodontist* 84(4): 642–648. doi: 10.2319/080513-584.1

277. Toth LR, McNamara,JA,Jr (1999) Treatment effects produced by the twin-block appliance and the FR-2 appliance of Frankel compared with an untreated Class II sample. *American Journal of Orthodontics & Dentofacial Orthopedics* 116(6): 597–609
278. Trankmann J, Lisson JA, Treutlein C (2001) Different orthodontic treatment effects in Angle Class III patients. *Journal of Orofacial Orthopedics* 62(5): 327–336
279. Trawitzki LV, Dantas RO, Mello-Filho FV et al. (2010) Masticatory muscle function three years after surgical correction of class III dentofacial deformity. *International Journal of Oral & Maxillofacial Surgery* 39(9): 853–856. doi: 10.1016/j.ijom.2009.03.006
280. Trenouth MJ (2000) Cephalometric evaluation of the Twin-block appliance in the treatment of Class II Division 1 malocclusion with matched normative growth data. *American Journal of Orthodontics & Dentofacial Orthopedics* 117(1): 54–59
281. Trenouth MJ (2002) Proportional changes in cephalometric distances during Twin Block appliance therapy. *European Journal of Orthodontics* 24(5): 485–491
282. Trenouth MJ (2006) Centroid analysis of twin-block appliance treatment for Class II Division 1 malocclusion. *World Journal of Orthodontics* 7(2): 159–164
283. Trenouth MJ, Mew JR, Gibbs WW (2001) A cephalometric evaluation of the Biobloc technique using matched normative data. *Journal of Orofacial Orthopedics* 62(6): 466–475
284. Tristão, Sylvia Karla P C, Magno MB, Pintor AVB et al. (2020) Is there a relationship between malocclusion and bullying? A systematic review. *Progress in Orthodontics* 21(1): 26. doi: 10.1186/s40510-020-00323-7
285. Tsiouli K, Topouzelis N, Papadopoulos MA et al. (2017) Perceived facial changes of Class II Division 1 patients with convex profiles after functional orthopedic treatment followed by fixed orthodontic appliances. *Am. J. Orthod. Dentofac. Orthop.* 152(1): 80–91. doi: 10.1016/j.ajodo.2016.12.017
286. Tulloch JF, Phillips C, Koch G et al. (1997) The effect of early intervention on skeletal pattern in Class II malocclusion: a randomized clinical trial. *American Journal of Orthodontics & Dentofacial Orthopedics* 111(4): 391–400
287. Tulloch JF, Proffit WR, Phillips C (2004) Outcomes in a 2-phase randomized clinical trial of early Class II treatment. *American Journal of Orthodontics & Dentofacial Orthopedics* 125(6): 657–667
288. Tumer N, Gultan AS (1999) Comparison of the effects of monoblock and twin-block appliances on the skeletal and dentoalveolar structures. *American Journal of Orthodontics & Dentofacial Orthopedics* 116(4): 460–468
289. Tuncer BB, Kaygisiz E, Tuncer C et al. (2009) Pharyngeal airway dimensions after chin cup treatment in Class III malocclusion subjects. *J. Oral Rehabil.* 36(2): 110–117. doi: 10.1111/j.1365-2842.2008.01910.x
290. Turkkahraman H, Sayin MO (2006) Effects of activator and activator headgear treatment: comparison with untreated Class II subjects. *Eur. J. Orthodont.* 28(1): 27–34. doi: 10.1093/ejo/cji062

291. Ucem TT, Ucuncu N, Yuksel S (2004) Comparison of double-plate appliance and facemask therapy in treating Class III malocclusions. *Am. J. Orthod. Dentofac. Orthop.* 126(6): 672–679. doi: 10.1016/j.ajodo.2003.09.035
292. Ulger G, Arun T, Sayinsu K et al. (2006) The role of cervical headgear and lower utility arch in the control of the vertical dimension. *American Journal of Orthodontics & Dentofacial Orthopedics* 130(4): 492–501
293. Ulusoy C, Canigur, Bavbek, N, Tuncer BB et al. (2014) Evaluation of airway dimensions and changes in hyoid bone position following class II functional therapy with activator. *Acta Odontologica Scandinavica* 72(8): 917–925. doi: 10.3109/00016357.2014.923109
294. Usumez S, Uysal T, Sari Z et al. (2004) The effects of early preorthodontic trainer treatment on Class II, division 1 patients. *Angle Orthodontist* 74(5): 605–609
295. van Lierde KM, Luyten A, D'haeseleer E et al. (2015) Articulation and oromyofunctional behavior in children seeking orthodontic treatment. *Oral Dis.* 21(4): 483–492. doi: 10.1111/odi.12307
296. Vanlaecken R, Martin CA, Dischinger T et al. (2006) Treatment effects of the edgewise Herbst appliance: a cephalometric and tomographic investigation. *American Journal of Orthodontics & Dentofacial Orthopedics* 130(5): 582–593
297. Varlik SK, Iscan HN (2008) The effects of cervical headgear with an expanded inner bow in the permanent dentition. *European Journal of Orthodontics* 30(4): 425–430. doi: 10.1093/ejo/cjn016
298. Vázquez-Casas I, Sans-Capdevila O, Moncunill-Mira J et al. (2020) Prevalence of sleep-related breathing disorders in children with malocclusion. *Journal of Clinical & Experimental Dentistry* 12(6): e555-e560. doi: 10.4317/jced.56855
299. Vilanova L, Henriques JF, Janson G et al. (2018) Class II malocclusion treatment effects with Jones Jig and Distal Jet followed by fixed appliances. *Angle Orthodontist* 88(1): 10–19
300. Watkinson S, Harrison JE, Furness S et al. (2013) Orthodontic treatment for prominent lower front teeth (Class III malocclusion) in children. [Review]. *Cochrane Database of Systematic Reviews* 013(9): CD003451. doi: 10.1002/14651858.CD003451.pub2
301. Wendl B, Muchitsch AP, Winsauer H et al. (2017) Retrospective 25-year follow-up of treatment outcomes in angle Class III patients : Early versus late treatment. *Journal of Orofacial Orthopedics* 78(3): 201–210. doi: 10.1007/s00056-016-0076-7
302. Westwood PV, McNamara JA, Baccetti T et al. (2003) Long-term effects of Class III treatment with rapid maxillary expansion and facemask therapy followed by fixed appliances. *Am. J. Orthod. Dentofac. Orthop.* 123(3): 306–320. doi: 10.1067/mod.2003.44
303. Wieslander L (1975) Early or late cervical traction therapy of Class II malocclusion in the mixed dentition. *American Journal of Orthodontics* 67(4): 432–439
304. Woon SC, Thiruvengkatachari B (2017) Early orthodontic treatment for Class III malocclusion: A systematic review and meta-analysis. [Review]. *American Journal of Orthodontics & Dentofacial Orthopedics* 151(1): 28–52. doi: 10.1016/j.ajodo.2016.07.017



305. Xiang M, Hu B, Liu Y et al. (2017) Changes in airway dimensions following functional appliances in growing patients with skeletal class II malocclusion: A systematic review and meta-analysis. [Review]. *International Journal of Pediatric Otorhinolaryngology* 97: 170–180. doi: 10.1016/j.ijporl.2017.04.009
306. Yagci A, Uysal T (2010) Effects of conventional and modified facemask therapies on dentofacial structures. *Korean J. Orthod.* 40(6): 432–443. doi: 10.4041/kjod.2010.40.6.432
307. Yang X, Li C, Bai D et al. (2014) Treatment effectiveness of Frankel function regulator on the Class III malocclusion: a systematic review and meta-analysis. [Review]. *American Journal of Orthodontics & Dentofacial Orthopedics* 146(2): 143–154. doi: 10.1016/j.ajodo.2014.04.017
308. Yavuz I, Halicioglu K, Ceylan I (2009) Face mask therapy effects in two skeletal maturation groups of female subjects with skeletal Class III malocclusions. *Angle Orthodontist* 79(5): 842–848. doi: 10.2319/090308-462.1
309. Zhang Y, Jia H, Fu Z et al. (2018) Dentoskeletal effects of facemask therapy in skeletal Class III cleft patients with or without bone graft. *American journal of orthodontics and dentofacial orthopedics* 153(4): 542–549
310. Zhao N, Feng J, Hu Z et al. (2015) Effects of a novel magnetic orthopedic appliance (MOA-III) on the dentofacial complex in mild to moderate skeletal class III children. *Head & Face Medicine* 11: 34. doi: 10.1186/s13005-015-0092-7
311. Zheng D-H, Wang X-X, Su Y-R et al. (2015) Assessing changes in quality of life using the Oral Health Impact Profile (OHIP) in patients with different classifications of malocclusion during comprehensive orthodontic treatment. *BMC Oral Health* 15: 148. doi: 10.1186/s12903-015-0130-7
312. Zhou Y, Long H, Ye N et al. (2014) The effectiveness of non-surgical maxillary expansion: a meta-analysis. *European Journal of Orthodontics* 36(2): 233–242. doi: 10.1093/ejo/cjt044
313. Zhou Y, Wang Y, Wang X et al. (2014) The impact of orthodontic treatment on the quality of life a systematic review. *BMC Oral Health* 14: 66. doi: 10.1186/1472-6831-14-66
314. Zou B, Zhou Y, Lowe AA et al. (2015) Changes in anteroposterior position and inclination of the maxillary incisors after surgical-orthodontic treatment of skeletal class III malocclusions. *J. Cranio-MaxilloFac. Surg.* 43(10): 1986–1993. doi: 10.1016/j.jcms.2014.12.013
315. Zymperdikas VF, Koretsi V, Papageorgiou SN et al. (2016) Treatment effects of fixed functional appliances in patients with Class II malocclusion: a systematic review and meta-analysis. [Review]. *European Journal of Orthodontics* 38(2): 113–126. doi: 10.1093/ejo/cjv034
