# Supplementary material for: Ideal treatment timing of orthodontic anomalies—a German clinical S3 practice guideline
Source: Springer Nature journal article supplement (doi:10.1007/s00056-022-00409-3), 2022-06-17
Supplement: MOESM2 [file 23176886]

**Supplementary Table 1:** Search string used for guideline databases (here adapted to the database National Institute for Health and Care Excellence NICE).

**Ergänzungstabelle 1:** Suchalgorithmus für Leitliniendatenbanken (hier angepasst an die Datenbank National Institute for Health and Care Excellence NICE).

orthodont\* OR orthognath\* OR malocclu\* OR retrognath\* OR micrognath\* OR prognath\*  
OR "angle class" OR "class i" OR "class ii" OR "class iii" OR occlusion\* OR bite OR  
retrognath\* OR micrognath\* OR overjet OR "over jet" OR prognath\* OR progeny OR cleft  
OR Engstand OR "facial asymmetry" OR crossbite OR "cross bite" OR "non occlusion" OR  
nonocclusion OR crowding OR "open bite" OR openbite OR "deep bite" OR deepbite OR  
"over bite" OR overbite OR "under bite" OR underbite OR "reverse bite" OR reversebite OR  
"midline deviation" OR "midline shift" OR "mandibular deviation" OR dentofacial OR  
"dento facial" OR "tooth movement" OR "craniofacial growth" OR "growth modification"  
OR multibracket OR "fixed appliance" OR "fixed appliances" OR "functional appliance" OR  
"functional appliances"
