# Supplementary material for: Ideal treatment timing of orthodontic anomalies—a German clinical S3 practice guideline
Source: Springer Nature journal article supplement (doi:10.1007/s00056-022-00409-3), 2022-06-17
Supplement: MOESM3 [file 23176886]

**Supplementary Table 2:** Search string and history used for main systematic literature research (here adapted to the database MEDLINE/PubMed).

**Ergänzungstabelle 2:** Suchalgorithmus und -historie für die systematische Hauptliteraturrecherche (hier angepasst an die Datenbank MEDLINE/PubMed).

| Step | Search string                                                                                                                                                                                                                                                                                                                                                                                                                                                                                                                                                                                                                                                                                   | Hits  | Comment                      |
|------|-------------------------------------------------------------------------------------------------------------------------------------------------------------------------------------------------------------------------------------------------------------------------------------------------------------------------------------------------------------------------------------------------------------------------------------------------------------------------------------------------------------------------------------------------------------------------------------------------------------------------------------------------------------------------------------------------|-------|------------------------------|
| 1    | Malocclusion, Angle Class I/ or Open Bite/ or (Malocclusion/ and anterior\$.ti,ab,kf.) or (("class i" or "class 1") and (angle or angles or malocclusion\$ or bite\$)).ti,ab,kf. or (openbite\$ or "open bite\$" or apertognathi\$ or nonocclusion\$ or non-occlusion\$).ti,ab,kf. or (crossbite\$ or "cross bite\$").ti,ab,kf. or (overbite\$ or "over bite\$").ti,ab,kf. or (underbite\$ or "under bite\$").ti,ab,kf. or (deepbite\$ or "deep bite\$").ti,ab,kf. or Engstand.ti,ab,kf. or crowding.ti,ab,kf. or Facial Asymmetry/ or "facial asymmetr\$".ti,ab,kf. or ("midline deviation\$" or "midline shift\$" or "mandibular deviation\$").ti,ab,kf. or "short face syndrome\$".ti,ab,kf. | 25081 | Angle class I malocclusion   |
| 2    | exp Malocclusion, Angle Class II/ or Retrognathism/ or Micrognathism/ or (("class ii" or "class 2") and (angle or angles or malocclusion\$ or bite\$)).ti,ab,kf. or (posterior adj3 occlusion\$).ti,ab,kf. or (distocclusion\$ or disto-occlusion\$ or distocclusion\$).ti,ab,kf. or (distal adj (occlusion\$ or bite\$)).ti,ab,kf. or retrognath\$.ti,ab,kf. or (prominent adj3 upper adj3 teeth).ti,ab,kf. or (overjet\$ or "over jet\$").ti,ab,kf. or (mandib\$ adj3 (micrognath\$ or retropos\$ or retrus\$)).ti,ab,kf. or (maxill\$ adj3 (prognath\$ or anteposition\$)).ti,ab,kf. or ((teeth or incisor\$) adj3 (retro-clin\$ or retroclin\$)).ti,ab,kf.                                  | 13837 | Angle class II malocclusion  |
| 3    | Malocclusion, Angle Class III/ or Prognathism/ or (("class III" or "class 3") and (angle or angles or malocclusion\$ or bite\$)).ti,ab,kf. or "reverse bite\$".ti,ab,kf. or prognath\$.ti,ab,kf. or (prominent adj3 lower adj3 teeth).ti,ab,kf. or ("mesial occlusion\$" or "mesial bite\$").ti,ab,kf. or (progeny and (chin or face or maxillofac\$ or orthodontic\$)).ti,ab,kf. or ("negative overjet" or "negative over-jet").ti,ab,kf. or (maxill\$ adj3 (micrognath\$ or retropos\$ or retrus\$)).ti,ab,kf. or Cleft Palate/ or Cleft Lip/ or (harelip\$ or "hare lip\$").ti,ab,kf. or (cleft adj3 (lip\$ or palat\$)).ti,ab,kf.                                                           | 36427 | Angle class III malocclusion |

|   |                                                                                                                                                                                                                                                                                                                                                                                                                                                                                                                                                                                                                                                                                                                                                                                                                                                                                                                                                                                                                                                                                                                                                                                                                                                                                                                                                                                                                                                                                                 |        |                                    |
|---|-------------------------------------------------------------------------------------------------------------------------------------------------------------------------------------------------------------------------------------------------------------------------------------------------------------------------------------------------------------------------------------------------------------------------------------------------------------------------------------------------------------------------------------------------------------------------------------------------------------------------------------------------------------------------------------------------------------------------------------------------------------------------------------------------------------------------------------------------------------------------------------------------------------------------------------------------------------------------------------------------------------------------------------------------------------------------------------------------------------------------------------------------------------------------------------------------------------------------------------------------------------------------------------------------------------------------------------------------------------------------------------------------------------------------------------------------------------------------------------------------|--------|------------------------------------|
| 4 | Malocclusion/ or malocclusion\$.ti,ab,kf. or Dental Occlusion, Traumatic/ or "traumatic dental occlusion".ti,ab,kf. or ("angle class\$" or "angles class\$").ti,ab,kf.                                                                                                                                                                                                                                                                                                                                                                                                                                                                                                                                                                                                                                                                                                                                                                                                                                                                                                                                                                                                                                                                                                                                                                                                                                                                                                                          | 31559  | Malocclusion unspecified           |
| 5 | or/1-4                                                                                                                                                                                                                                                                                                                                                                                                                                                                                                                                                                                                                                                                                                                                                                                                                                                                                                                                                                                                                                                                                                                                                                                                                                                                                                                                                                                                                                                                                          | 83640  | Malocclusion total                 |
| 6 | exp Orthodontics/ or ((orthodontic\$ or dental) and (brace\$ or band\$ or wire\$)).ti,ab,kf. or (orthodontic\$ and (extract\$ or remov\$)).ti,ab,kf. or (orthodontic\$ and (headgear\$ or "head gear\$")).ti,ab,kf. or ((appliance\$ or device\$) adj5 (function\$ or remova\$ or fix\$)).ti,ab,kf. or ((appliance\$ or device\$) adj5 (intraoral or "intra oral" or extraoral or "extra oral")).ti,ab,kf. or (activator adj appliance\$).ti,ab,kf. or (Frankel or "twin\$ block\$" or FR-II).ti,ab,kf. or ((growth adj3 modif\$) and (jaw\$ or maxilla\$ or mandible\$ or mandibular)).ti,ab,kf. or ((one-phase or two-phase) and (treatment or therapy) and (orthodontic\$ or malocclusion\$)).ti,ab,kf. or ((extraoral or "extra oral") and traction).ti,ab,kf. or "chin cap\$".ti,ab,kf. or (("face mask\$" or facemask\$ or "reverse head-gear" or "reverse headgear") and orthodontic\$).ti,ab,kf. or ((orthopedic\$ or orthopaedic\$) and (dental or orthodontic\$ or facial)).ti,ab,kf. or (orthodontic\$ adj (alignment\$ or correction\$ or therapy or therapies or treatment\$ or management or interceptive or interception\$ or rehabilitation)).ti,ab,kf. or ("tooth movement" or OTM).ti,ab,kf. or (intrusion\$ or extrusion\$ or "mesial movement\$" or "distal movement\$" or protraction\$).ti,ab,kf. or ("maxillary expansion\$" or "arch expansion\$" or (RME and maxill\$) or SARME).ti,ab,kf. or ((camouflage or advancement or repositioning) and orthodont\$).ti,ab,kf. | 108585 | Non-surgical orthodontic treatment |
| 7 | exp orthognathic surgical procedures/ or osteotomy, le fort/ or osteotomy, sagittal split ramus/ or Osteotomy/ or Surgery, Oral/ or Oral Surgical Procedures/ or Jaw Fixation Techniques/ or Mandibular Advancement/ or exp Orthognathic Surgical Procedures/ or ((Jaw Abnormalities/ or exp Malocclusion/ or Micrognathism/ or Retrognathia/ or exp Jaw/) and su.fs.) or orthognath\$.ti,ab,kf. or (orthodont\$ and                                                                                                                                                                                                                                                                                                                                                                                                                                                                                                                                                                                                                                                                                                                                                                                                                                                                                                                                                                                                                                                                            | 103767 | Orthognathic surgery               |

|    |                                                                                                                                                                                                                                                                                                                                                                                                                                                                                                                                                                                                                                                                                                                                                                                                                                                                                                                                                                                                    |        |                                              |
|----|----------------------------------------------------------------------------------------------------------------------------------------------------------------------------------------------------------------------------------------------------------------------------------------------------------------------------------------------------------------------------------------------------------------------------------------------------------------------------------------------------------------------------------------------------------------------------------------------------------------------------------------------------------------------------------------------------------------------------------------------------------------------------------------------------------------------------------------------------------------------------------------------------------------------------------------------------------------------------------------------------|--------|----------------------------------------------|
|    | (surgery or surgeries or surgical)).ti,ab,kf. or ((mandib\$ or jaw\$ or maxill\$ or bimaxillary or Prognath\$ or Retrognath\$ or occlusion or malocclusion or angle or "class I" or "class 1" or "class II" or "class 2" or "class III" or "class 3" or nonocclusion or overbite\$ or "cross bite\$" or crossbite\$ or "under bite\$" or underbite\$ or "over bite\$" or openbite\$ or "open bite\$" or "deep bite\$" or deepbite\$ or "over jet\$" or overjet\$ or dentofacial or "dento facial" or ramal or ramus) adj3 (surg\$ or procedure\$ or operation\$ or operative or correct\$ or osteotom\$ or advancement or reduction\$ or reposition\$ or setback or advancement or retropos\$ or retrus\$ or fixation\$ or distract\$ or resect\$)).ti,ab,kf. or (mandibulotom\$ or mandibulectom\$ or hemimandibulectom\$ or maxillotom\$ or maxillectom\$).ti,ab,kf. or ("Le Fort" or lefort).ti,ab,kf. or ((jaw abnormalities/ or micrognathism/ or retrognathia/ or malocclusion/) and su.fs.) |        |                                              |
| 8  | 6 or 7                                                                                                                                                                                                                                                                                                                                                                                                                                                                                                                                                                                                                                                                                                                                                                                                                                                                                                                                                                                             | 197917 | Orthodontic treatment                        |
| 9  | 5 and 8                                                                                                                                                                                                                                                                                                                                                                                                                                                                                                                                                                                                                                                                                                                                                                                                                                                                                                                                                                                            | 32712  | Malocclusion total and orthodontic treatment |
| 10 | exp clinical pathway/ or exp clinical protocol/ or exp consensus/ or exp consensus development conference/ or exp consensus development conferences as topic/ or critical pathways/ or exp guideline/ or guidelines as topic/ or exp practice guideline/ or practice guidelines as topic/ or health planning guidelines/ or exp treatment guidelines/ or (guideline or practice guideline or consensus development conference or consensus development conference, NIH).pt. or (position statement* or policy statement* or practice parameter* or best practice*).ti,ab,kf,kw. or (standards or guideline or guidelines).ti,kf,kw. or ((practice or treatment* or clinical) adj guideline*).ab. or (CPG or CPGs).ti. or consensus*.ti,kf,kw.                                                                                                                                                                                                                                                      | 470124 |                                              |
| 11 | consensus*.ab. /freq=2                                                                                                                                                                                                                                                                                                                                                                                                                                                                                                                                                                                                                                                                                                                                                                                                                                                                                                                                                                             | 23244  |                                              |
| 12 | ((critical or clinical or practice) adj2 (path or paths or pathway or pathways or protocol*)).ti,ab,kf,kw. or                                                                                                                                                                                                                                                                                                                                                                                                                                                                                                                                                                                                                                                                                                                                                                                                                                                                                      | 124175 |                                              |

|    |                                                                                                                                                                                                                                                                                                                                                                                                                                                                                                                                                                                                                                                                                                                                                                                                                                                                                                                                                                                                                                                                                 |        |                                                                                                                                       |
|----|---------------------------------------------------------------------------------------------------------------------------------------------------------------------------------------------------------------------------------------------------------------------------------------------------------------------------------------------------------------------------------------------------------------------------------------------------------------------------------------------------------------------------------------------------------------------------------------------------------------------------------------------------------------------------------------------------------------------------------------------------------------------------------------------------------------------------------------------------------------------------------------------------------------------------------------------------------------------------------------------------------------------------------------------------------------------------------|--------|---------------------------------------------------------------------------------------------------------------------------------------|
|    | <p>recommendat*.ti,kf,kw. or (care adj2 (standard or path or paths or pathway or pathways or map or maps or plan or plans)).ti,ab,kf,kw. or (algorithm* adj2 (screening or examination or test or tested or testing or assessment* or diagnosis or diagnoses or diagnosed or diagnosing)).ti,ab,kf,kw. or (algorithm* adj2 (pharmacotherap* or chemotherap* or chemotreatment* or therap* or treatment* or intervention*)).ti,ab,kf,kw.</p>                                                                                                                                                                                                                                                                                                                                                                                                                                                                                                                                                                                                                                     |        |                                                                                                                                       |
| 13 | or/10-12                                                                                                                                                                                                                                                                                                                                                                                                                                                                                                                                                                                                                                                                                                                                                                                                                                                                                                                                                                                                                                                                        | 577944 | CADTH Search<br>Filter for<br>Guidelines -<br>OVID Medline,<br>Embase,<br>PsycINFO                                                    |
| 14 | 9 and 13                                                                                                                                                                                                                                                                                                                                                                                                                                                                                                                                                                                                                                                                                                                                                                                                                                                                                                                                                                                                                                                                        | 429    | Malocclusion<br>total AND<br>orthodontic<br>treatment AND<br>Guidelines                                                               |
| 15 | <p>meta-analysis.pt. or (meta-analysis/ or systematic review/ or meta-analysis as topic/ or "meta analysis (topic)"/ or "systematic review (topic)"/ or exp technology assessment, biomedical/) or ((systematic* adj3 (review* or overview*)) or (methodologic* adj3 (review* or overview*))).ti,ab,kf,kw. or ((quantitative adj3 (review* or overview* or synthes*)) or (research adj3 (integrati* or overview*))).ti,ab,kf,kw. or ((integrative adj3 (review* or overview*)) or (collaborative adj3 (review* or overview*)) or (pool* adj3 analy*)).ti,ab,kf,kw. or (data synthes* or data extraction* or data abstraction*).ti,ab,kf,kw. or (handsearch* or hand search*).ti,ab,kf,kw. or (mantel haenszel or peto or der simonian or dersimonian or fixed effect* or latin square*).ti,ab,kf,kw. or (met analy* or metanaly* or technology assessment* or HTA or HTAs or technology overview* or technology appraisal*).ti,ab,kf,kw. or (meta regression* or metaregression*).ti,ab,kf,kw. or (meta-analy* or metaanaly* or systematic review* or biomedical technology</p> | 422572 | CADTH Search<br>Filter for<br>Systematic<br>Reviews/Meta-<br>Analysis/Health<br>Technology<br>Assessment –<br>OVID Medline,<br>Embase |

|    |                                                                                                                                                                                                                                                                                                                                                                                                                                      |         |                                                                                                           |
|----|--------------------------------------------------------------------------------------------------------------------------------------------------------------------------------------------------------------------------------------------------------------------------------------------------------------------------------------------------------------------------------------------------------------------------------------|---------|-----------------------------------------------------------------------------------------------------------|
|    | assessment* or bio-medical technology assessment*).mp,hw. or (medline or cochrane or pubmed or medlars or embase or cinahl).ti,ab,hw. or (cochrane or (health adj2 technology assessment) or evidence report).jw. or (comparative adj3 (efficacy or effectiveness)).ti,ab,kf,kw. or (outcomes research or relative effectiveness).ti,ab,kf,kw. or ((indirect or indirect treatment or mixed-treatment) adj comparison*).ti,ab,kf,kw. |         |                                                                                                           |
| 16 | 9 and 15                                                                                                                                                                                                                                                                                                                                                                                                                             | 498     | Malocclusion<br>total AND<br>orthodontic<br>treatment AND<br>SR & meta-<br>analyses & HTA                 |
| 17 | 14 or 16                                                                                                                                                                                                                                                                                                                                                                                                                             | 914     | Malocclusion<br>total AND<br>orthodontic<br>treatment AND<br>Guidelines &<br>SR & meta-<br>analyses & HTA |
| 18 | limit 17 to (english or german)                                                                                                                                                                                                                                                                                                                                                                                                      | 859     | Language filter                                                                                           |
| 19 | randomized controlled trial.pt.                                                                                                                                                                                                                                                                                                                                                                                                      | 486827  |                                                                                                           |
| 20 | controlled clinical trial.pt.                                                                                                                                                                                                                                                                                                                                                                                                        | 93200   |                                                                                                           |
| 21 | randomized.ab.                                                                                                                                                                                                                                                                                                                                                                                                                       | 451813  |                                                                                                           |
| 22 | placebo.ab.                                                                                                                                                                                                                                                                                                                                                                                                                          | 200030  |                                                                                                           |
| 23 | clinical trials as topic.sh.                                                                                                                                                                                                                                                                                                                                                                                                         | 187884  |                                                                                                           |
| 24 | randomly.ab.                                                                                                                                                                                                                                                                                                                                                                                                                         | 316380  |                                                                                                           |
| 25 | trial.ti.                                                                                                                                                                                                                                                                                                                                                                                                                            | 203268  |                                                                                                           |
| 26 | 19 or 20 or 21 or 22 or 23 or 24 or 25                                                                                                                                                                                                                                                                                                                                                                                               | 1232705 |                                                                                                           |
| 27 | exp animals/ not humans.sh.                                                                                                                                                                                                                                                                                                                                                                                                          | 4606297 |                                                                                                           |
| 28 | 26 not 27                                                                                                                                                                                                                                                                                                                                                                                                                            | 1133858 | Cochrane<br>Highly Sensitive<br>Search Strategy<br>2008 sensitive<br>and precise<br>MEDLINE Ovid          |

|    |                                                                                                |       |                                                                                                                                                                                                                                                                                               |
|----|------------------------------------------------------------------------------------------------|-------|-----------------------------------------------------------------------------------------------------------------------------------------------------------------------------------------------------------------------------------------------------------------------------------------------|
| 29 | Clinical Trial, Phase III/ or ("phase 3" or "phase3" or "phase III" or P3 or "PIII").ti,ab,kw. | 68710 | Filter P3 for Phase III Clinical Trials. From: Cooper C, Varley-Campbell J, Carter P. Established search filters may miss studies when identifying randomized controlled trials. Journal of Clinical Epidemiology. 2019;112:12–9. doi: 10.1016/j.jclinepi.2019.04.002. PubMed PMID: 30986533. |
| 30 | 9 and 28                                                                                       | 1449  | Malocclusion total AND orthodontic treatment AND study filter Cochrane                                                                                                                                                                                                                        |
| 31 | 9 and 29                                                                                       | 21    | Malocclusion total AND orthodontic treatment AND P3-study-filter                                                                                                                                                                                                                              |
| 32 | 30 or 31                                                                                       | 1466  | Malocclusion total AND orthodontic                                                                                                                                                                                                                                                            |

|    |                                                                                                                                                                                                                                                                                                                                                                                                                                                                                                                                                              |         |                                                                                                                                                |
|----|--------------------------------------------------------------------------------------------------------------------------------------------------------------------------------------------------------------------------------------------------------------------------------------------------------------------------------------------------------------------------------------------------------------------------------------------------------------------------------------------------------------------------------------------------------------|---------|------------------------------------------------------------------------------------------------------------------------------------------------|
|    |                                                                                                                                                                                                                                                                                                                                                                                                                                                                                                                                                              |         | treatment AND<br>primary studies                                                                                                               |
| 33 | limit 32 to (english or german)                                                                                                                                                                                                                                                                                                                                                                                                                                                                                                                              | 1386    | Language filter                                                                                                                                |
| 34 | (effectiveness or efficacy or effect or effects or impact or benefit or benefits or advantage or advantages or value or usefulness or avail or avails or improve\$ or superior or superiority or inferior or inferiority or "treatment result" or "treatment results" or outcome or outcomes or need or preventive or prevention or duration or "treatment time" or "health gain" or disadvantage or disadvantages or harm or harms or "side effect" or "side effects" or "adverse effect" or "adverse effects").ti,ab,kf. not (exp animals/ not humans.sh.) | 8669135 | Comparative<br>view of outcome                                                                                                                 |
| 35 | 9 and 34                                                                                                                                                                                                                                                                                                                                                                                                                                                                                                                                                     | 12636   | Malocclusion<br>total AND<br>orthodontic<br>treatment AND<br>comparative<br>view of outcome                                                    |
| 36 | (early or late or timing or time or deciduous or "primary dentition" or "mixed dentition" or "permanent dentition" or growing or infants or newborn or child or children or teenager or teenagers or adolescent or adolescents or adult or adults).ti,ab,kf.                                                                                                                                                                                                                                                                                                 | 6501161 | Comparison<br>time point of<br>treatment                                                                                                       |
| 37 | 35 and 36                                                                                                                                                                                                                                                                                                                                                                                                                                                                                                                                                    | 6150    | Malocclusion<br>total AND<br>orthodontic<br>treatment AND<br>comparative<br>view of outcome<br>AND<br>comparison time<br>point of<br>treatment |
| 38 | limit 37 to (english or german)                                                                                                                                                                                                                                                                                                                                                                                                                                                                                                                              | 5576    | Language filter                                                                                                                                |
| 39 | 18                                                                                                                                                                                                                                                                                                                                                                                                                                                                                                                                                           | 859     | Aggregated<br>evidence                                                                                                                         |

|    |                   |      |                                                         |
|----|-------------------|------|---------------------------------------------------------|
| 40 | 33 not 18         | 1222 | Controlled studies                                      |
| 41 | 38 not (18 or 33) | 4699 | Remaining studies on comparison time point of treatment |
| 42 | or/39-41          | 6780 | Total hits                                              |
