# Supplementary material for: Ideal treatment timing of orthodontic anomalies—a German clinical S3 practice guideline
Source: Springer Nature journal article supplement (doi:10.1007/s00056-022-00409-3), 2022-06-17
Supplement: MOESM4 [file 23176886]

**Supplementary Table 3:** Search string and history used for the additional systematic literature research for cross-sectional studies (MEDLINE/PubMed).

**Ergänzungstabelle 3:** Suchalgorithmus und -historie für die zusätzliche systematische Literaturrecherche nach Assoziationsstudien (MEDLINE/PubMed).

| Step | Search string                                                                                                                                                                                                                                                                                                                                                                                                                                                                                                                                                                                                                                                                                                                                                                                                                                                                                                                                             | Hits      | Comments                                             |
|------|-----------------------------------------------------------------------------------------------------------------------------------------------------------------------------------------------------------------------------------------------------------------------------------------------------------------------------------------------------------------------------------------------------------------------------------------------------------------------------------------------------------------------------------------------------------------------------------------------------------------------------------------------------------------------------------------------------------------------------------------------------------------------------------------------------------------------------------------------------------------------------------------------------------------------------------------------------------|-----------|------------------------------------------------------|
| 1    | (orthodont* OR orthognath* OR malocclu* OR dysgnath* OR "angle class" OR "dental occlusion"~3 OR "distal occlusion" OR "posterior occlusion" OR "mesial occlusion" OR "prominent lower front teeth" OR "prominent upper front teeth" OR retrognath* OR micrognath* OR overjet OR "over jet" OR prognath* OR "facial asymmetry" OR crossbite OR "cross bite" OR "non occlusion" OR nonocclusion OR "open bite" OR openbite OR "deep bite" OR deepbite OR "mesial bite" OR "over bite" OR overbite OR "under bite" OR underbite OR "reverse bite" OR (crowding AND (tooth OR teeth OR dental)) OR "midline deviation" OR "midline shift" OR "mandibular deviation" OR "tooth movement" OR "craniofacial growth" OR "growth modification" OR multibracket OR "fixed appliance" OR "fixed appliances" OR "functional appliance" OR "functional appliances" OR ((extraoral OR "extra oral") AND traction) OR chincap OR "chin cap" OR chincaps OR "chin caps") | 59.793    | Malocclusions and dysgnathias, orthodontic treatment |
| 2    | (correlation* OR association* OR relation* OR interrelation* OR connection* OR interconnection* OR link)                                                                                                                                                                                                                                                                                                                                                                                                                                                                                                                                                                                                                                                                                                                                                                                                                                                  | 4.885.006 | associations                                         |
| 3    | ("quality of life" OR QoL OR OHRQoL OR psycholog*)                                                                                                                                                                                                                                                                                                                                                                                                                                                                                                                                                                                                                                                                                                                                                                                                                                                                                                        | 1.967.862 | Quality of life                                      |
| 4    | (mastication OR masticator* OR gastric)                                                                                                                                                                                                                                                                                                                                                                                                                                                                                                                                                                                                                                                                                                                                                                                                                                                                                                                   | 431.891   | Mastication and digestion                            |
| 5    | (airway OR apnea OR sleep OR respiration)                                                                                                                                                                                                                                                                                                                                                                                                                                                                                                                                                                                                                                                                                                                                                                                                                                                                                                                 | 630.699   | Respiration, sleep, airway                           |
| 6    | swallow*                                                                                                                                                                                                                                                                                                                                                                                                                                                                                                                                                                                                                                                                                                                                                                                                                                                                                                                                                  | 32.545    | Swallowing                                           |
| 7    | (speech OR sigmatism OR phoneti* OR phonat*)                                                                                                                                                                                                                                                                                                                                                                                                                                                                                                                                                                                                                                                                                                                                                                                                                                                                                                              | 136.434   | Speaking                                             |

|    |                                                                                                                               |        |                                                                                |
|----|-------------------------------------------------------------------------------------------------------------------------------|--------|--------------------------------------------------------------------------------|
| 8  | (trauma* AND (tooth OR teeth OR dental OR incisor OR incisal))                                                                | 16.483 | Dental Trauma                                                                  |
| 9  | 1 AND 2                                                                                                                       | 12.002 | Associations with Malocclusions and dysgnathias, orthodontic treatment (AMDOT) |
| 10 | 9 AND 3                                                                                                                       | 921    | AMDOT AND quality of life                                                      |
| 11 | 9 AND 4                                                                                                                       | 861    | AMDOT AND Mastication and digestion                                            |
| 12 | 9 AND 5                                                                                                                       | 646    | AMDOT AND Respiration, sleep, airway                                           |
| 13 | 9 AND 6                                                                                                                       | 138    | AMDOT AND Swallowing                                                           |
| 14 | 9 AND 7                                                                                                                       | 293    | AMDOT AND Speaking                                                             |
| 15 | 9 AND 8                                                                                                                       | 781    | AMDOT AND dental trauma                                                        |
| 16 | (review* OR overview* OR synthes* OR meta* OR RCT OR randomized controlled trial OR cohort OR case-control OR "case control") |        | Reviews/RCTs/controlled studies                                                |
| 17 | 9 AND 3 AND 16                                                                                                                | 266    | Reviews/RCTs/controlled studies AND AMDOT AND quality of life                  |
| 18 | 9 AND 4 AND 16                                                                                                                | 290    | Reviews/RCTs/controlled studies AND Mastication and digestion                  |
| 19 | 9 AND 5 AND 16                                                                                                                | 305    | Reviews/RCTs/controlled studies AND Respiration, sleep, airway                 |

|    |                |     |                                                   |
|----|----------------|-----|---------------------------------------------------|
| 20 | 9 AND 6 AND 16 | 46  | Reviews/RCTs/controlled studies AND Swallowing    |
| 21 | 9 AND 7 AND 16 | 101 | Reviews/RCTs/controlled studies AND Speaking      |
| 22 | 9 AND 8 AND 16 | 273 | Reviews/RCTs/controlled studies AND dental trauma |
