# Supplementary material for: Ideal treatment timing of orthodontic anomalies—a German clinical S3 practice guideline
Source: Springer Nature journal article supplement (doi:10.1007/s00056-022-00409-3), 2022-06-17
Supplement: MOESM5 [file 23176886]

**Supplementary Table 4:** Scientific investigators involved in the eligibility screening and quality assessment of full-text articles.

**Ergänzungstabelle 4:** Prüf(zahn)ärzte, die an der Überprüfung der Eignung und der Qualitätsbewertung von Volltextartikeln beteiligt waren.

| Scientific society                         | Abbreviation | Investigator                                                   |
|--------------------------------------------|--------------|----------------------------------------------------------------|
| <b>Working group I: class II anomalies</b> |              |                                                                |
| German Orthodontic Society                 | DGKFO        | Priv.-Doz. Dr. Dr. Christian Kirschneck (Sprecher, Regensburg) |
| German Orthodontic Society                 | DGKFO        | Dr. Julia von Bremen (Gießen)                                  |
| German Orthodontic Society                 | DGKFO        | Prof. Dr. Angelika Stellzig-Eisenhauer (Würzburg)              |
| German Orthodontic Society                 | DGKFO        | Priv.-Doz. Dr. Felix Kunz (Würzburg)                           |
| German Orthodontic Society                 | DGKFO        | Dr. Lena Goetz (Würzburg)                                      |
| German Orthodontic Society                 | DGKFO        | Dr. Stefan Keß (Würzburg)                                      |
| German Orthodontic Society                 | DGKFO        | ZÄ Lisa Marie Widmaier (Würzburg)                              |
| German Orthodontic Society                 | DGKFO        | Dr. Carolin Ziegler (Würzburg)                                 |
| German Orthodontic Society                 | DGKFO        | ZÄ Anja Kunz (Würzburg)                                        |
| German Orthodontic Society                 | DGKFO        | Dr. Maximilian Bock (Würzburg)                                 |
| German Orthodontic Society                 | DGKFO        | Dr. Jana Grote (Würzburg)                                      |
| German Orthodontic Society                 | DGKFO        | Dr. Elisabeth Hübers (Würzburg)                                |
| German Orthodontic Society                 | DGKFO        | Priv.-Doz. Dr. Agnes Schröder (Regensburg)                     |
| German Orthodontic Society                 | DGKFO        | Dr. Eva Paddenberg (Regensburg)                                |
| German Orthodontic Society                 | DGKFO        | Dr. Jonas Breunig (Regensburg)                                 |

|                                                                               |       |                                                     |
|-------------------------------------------------------------------------------|-------|-----------------------------------------------------|
| German Orthodontic Society                                                    | DGKFO | Dr. Niklas Ullrich (Regensburg)                     |
| German Society for Operative Dentistry                                        | DGZ   | Prof. Dr. Anahita Jablonski-Momeni (Marburg)        |
| German Society for Preventive Dentistry                                       | DGPZM | Dr. Lutz Laurisch (Korschenbroich)                  |
| <b>Working group I: class III anomalies</b>                                   |       |                                                     |
| German Orthodontic Society                                                    | DGKFO | Prof. Dr. Christopher J. Lux (Sprecher, Heidelberg) |
| German Orthodontic Society                                                    | DGKFO | Dr. Ralf Erber (Heidelberg)                         |
| German Orthodontic Society                                                    | DGKFO | Dr. Sinan Şen (Heidelberg)                          |
| German Orthodontic Society                                                    | DGKFO | Dr. Christoph Roser (Heidelberg)                    |
| German Orthodontic Society                                                    | DGKFO | Priv.-Doz. Dr. Kathrin Becker (Düsseldorf)          |
| German Society for Medical Psychology                                         | DGMP  | Dr. Jutta Margraf-Stiksrud (Marburg)                |
| German Society for Oral and Maxillofacial Surgery                             | DGMKG | Prof. Dr. Dr. Christian Freudlsperger (Heidelberg)  |
| <b>Working group III: transversal and vertical anomalies, dental crowding</b> |       |                                                     |
| German Orthodontic Society                                                    | DGKFO | Prof. Dr. Dr. Ralf J. Radlanski (Sprecher, Berlin)  |
| German Orthodontic Society                                                    | DGKFO | Prof. Dr. Philipp Meyer-Marcotty (Göttingen)        |
| German Orthodontic Society                                                    | DGKFO | Dr. Anja Quast (Göttingen)                          |
| German Orthodontic Society                                                    | DGKFO | Dr. Daniela Klenke (Göttingen)                      |

|                                                                      |              |                                             |
|----------------------------------------------------------------------|--------------|---------------------------------------------|
| German Orthodontic Society                                           | DGKFO        | Dr. Petra Santander (Göttingen)             |
| German Orthodontic Society                                           | DGKFO        | Dr. Sarah Batschkus (Göttingen)             |
| German Orthodontic Society                                           | DGKFO        | ZA Bernhard Wiechens (Göttingen)            |
| German Orthodontic Society                                           | DGKFO        | Dr. Florian Behrend (Göttingen)             |
| German Society for<br>Otorhinolaryngology, Head-<br>and neck surgery | DGHNO<br>KHC | Prof. Dr. med. Mark Praetorius<br>(Mainz)   |
| Working group for oral and<br>maxillofacial surgery                  | AgKi         | Patricia Parvini (Kassel)                   |
| Federal Association of Pediatric<br>Dentists                         | BUKiZ        | Dr. Monika Prinz-Kattinger (Bad<br>Aibling) |
| German Society for Paediatric<br>Dentistry                           | DGKiZ        | Dr. Sabine Dobersch-Paulus<br>(Würzburg)    |
