# Supplementary material for: Ideal treatment timing of orthodontic anomalies—a German clinical S3 practice guideline
Source: Springer Nature journal article supplement (doi:10.1007/s00056-022-00409-3), 2022-06-17
Supplement: MOESM6 [file 23176886]

**Supplementary Table 5:** Elected delegates of the 21 German scientific societies, who participated in the development and consensus of statements and recommendations.

**Ergänzungstabelle 5:** Gewählte Mandatsträger der 21 deutschen wissenschaftlichen Fachgesellschaften, die an der Entwicklung und Abstimmung von Stellungnahmen und Empfehlungen mitgewirkt haben.

| Scientific society                                                                                    | Abbreviation | Elected Delegates                                                                                                                                 |
|-------------------------------------------------------------------------------------------------------|--------------|---------------------------------------------------------------------------------------------------------------------------------------------------|
| <b>Registering societies</b>                                                                          |              |                                                                                                                                                   |
| German Orthodontic Society                                                                            | DGKFO        | Prof. Dr. Dr. Peter Proff (delegate)<br>Prof. Dr. Christopher J. Lux<br>(coordinator)<br>Priv.-Doz. Dr. Dr. Christian<br>Kirschneck (coordinator) |
| German Dental Society                                                                                 | DGZMK        | Dr. Anke Weber (no vote)                                                                                                                          |
| <b>Scientific Societies of the AWMF</b>                                                               |              |                                                                                                                                                   |
| German Society for<br>Otorhinolaryngology, Head-<br>and neck surgery                                  | DGHNO KHC    | Prof. Dr. med. Mark Praetorius                                                                                                                    |
| German Society for Pediatric<br>Dentistry                                                             | DGKiZ        | Dr. Sabine Dobersch-Paulus                                                                                                                        |
| German Society for Pediatric<br>and Adolescent Medicine                                               | DGKJ         | Dr. Burkhard Lawrenz                                                                                                                              |
| German Society for Child and<br>Adolescent Psychiatry,<br>Psychosomatic Medicine and<br>Psychotherapy | DGKJP        | Prof. Dr. Romuald Brunner                                                                                                                         |
| German Society for Oral and<br>Maxillofacial Surgery                                                  | DGMKG        | Prof. Dr. Dr. Christian Freudlsperger                                                                                                             |

|                                                                     |         |                                           |
|---------------------------------------------------------------------|---------|-------------------------------------------|
| German Society for Medical Psychology                               | DGMP    | Dr. Jutta Margraf-Stiksrud                |
| German Society for Periodontology                                   | DG PARO | Priv.-Doz. Dr. Christian Graetz           |
| German Society for Prosthetic Dentistry and biomaterials            | DGPro   | Prof. Dr. Marc Schmitter                  |
| German Society for Operative Dentistry                              | DGZ     | Prof. Dr. Anahita Jablonski-Momeni        |
| <b>Further Scientific Societies</b>                                 |         |                                           |
| Working group for basic research in the DGZMK                       | AfG     | Prof. Dr. Dr. Ralf J. Radlanski           |
| Working group for oral and maxillofacial surgery                    | AGOKi   | Patricia Parvini                          |
| Federal Working Group of Patient Centers and Initiatives            | BAGP    | Gregor Bornes                             |
| Federal Association of Pediatric Dentists                           | BUKiZ   | Dr. Monika Prinz-Kattinger                |
| Federal Association of Dentists in the Public Health Service (BZÖG) | BZÖG    | Dr. Pantelis Petrakakis                   |
| German Society for Aesthetic Dentistry                              | DGÄZ    | Prof. Dr. Angelika Stellzig-Eisenhauer    |
| German Society for Preventive Dentistry                             | DGPZM   | Dr. Lutz Laurisch                         |
| Interdisciplinary working group on oral pathology and oral medicine | AKOPOM  | Prof. Dr. Dr. Urs Müller-Richter, FEBOMFS |

|                                                                   |      |                       |
|-------------------------------------------------------------------|------|-----------------------|
| National Association of<br>Statutory Health Insurance<br>Dentists | KZBV | Dr. Birgit Lange-Lenz |
| Association of Medical<br>Professionals                           | VMF  | Sylvia Gabel          |
