# Supplementary material for: Ideal treatment timing of orthodontic anomalies—a German clinical S3 practice guideline
Source: Springer Nature journal article supplement (doi:10.1007/s00056-022-00409-3), 2022-06-17
Supplement: MOESM7 [file 23176886]

## References

1. Abdalla Y, Brown L, Sonnesen L (2019) Effects of rapid maxillary expansion on upper airway volume: A three-dimensional cone-beam computed tomography study. *Angle Orthodontist* 019. doi: 10.2319/101218-738.1
2. Abrahamsson C (2013) Masticatory function and temporomandibular disorders in patients with dentofacial deformities. *Swedish Dental Journal Supplement*(231): 9–85
3. Abu Alhaija ES, Richardson A (1999) Long-term effect of the chincap on hard and soft tissues. *Eur. J. Orthodont.* 21(3): 291–298
4. Abu Alhaija, Elham S. J., Al-Khateeb SN (2011) Skeletal, dental and soft tissue changes in Class III patients treated with fixed appliances and lower premolar extractions. *Aust. Orthod. J.* 27(1): 40–45
5. Agirnasligil MO, Amuk NG, Kilic E et al. (2019) The changes of self-esteem, sensitivity to criticism, and social appearance anxiety in orthognathic surgery patients: A controlled study. *Am. J. Orthod. Dentofac. Orthop.* 155(4): 482-+. doi: 10.1016/j.ajodo.2018.05.019
6. Agostino P, Ugolini A, Signori A et al. (2014) Orthodontic treatment for posterior crossbites. [Review]. *Cochrane Database of Systematic Reviews* 014(8): CD000979. doi: 10.1002/14651858.CD000979.pub2
7. Agou S, Locker D, Muirhead V et al. (2011) Does psychological well-being influence oral-health-related quality of life reports in children receiving orthodontic treatment? *American Journal of Orthodontics & Dentofacial Orthopedics* 139(3): 369–377. doi: 10.1016/j.ajodo.2009.05.034
8. Alali OH (2014) A prospective controlled evaluation of Class II division 1 malocclusions treated with fixed lingual mandibular growth modifier. *Angle Orthodontist* 84(3): 527–533. doi: 10.2319/070913-500.1
9. Alarcon JA, Bastir M, Rosas A et al. (2011) Chincup treatment modifies the mandibular shape in children with prognathism. *American Journal of Orthodontics & Dentofacial Orthopedics* 140(1): 38–43. doi: 10.1016/j.ajodo.2009.10.046
10. Al-Jewair TS, Preston CB, Moll EM et al. (2012) A comparison of the MARA and the AdvanSync functional appliances in the treatment of Class II malocclusion. *Angle Orthodontist* 82(5): 907–914. doi: 10.2319/090411-569.1
11. Al-Khalifa HN, Hashem MI, Alanazi KJ et al. (2017) Orthopedic Effect of Chin Cup during Mixed Dentition Stage. *Journal of Contemporary Dental Practice [Electronic Resource]* 18(5): 410–414
12. Allen RA, Connolly IH, Richardson A (1993) Early treatment of Class III incisor relationship using the chincap appliance. *European Journal of Orthodontics* 15(5): 371–376
13. de Almeida, Henriques JF, Almeida RR de et al. (2005) Short-term treatment effects produced by the Herbst appliance in the mixed dentition. *Angle Orthodontist* 75(4): 540–547. doi: 10.1043/0003-3219(2005)75[540:STEPBT]2.0.CO
14. Almeida-Pedrin RR, Almeida MR, Almeida RR et al. (2007) Treatment effects of headgear biteplane and bionator appliances. *American Journal of Orthodontics & Dentofacial Orthopedics* 132(2): 191–198

- 43 15. Altug-Atac AT, Erdem D (2007) Effects of three-dimensional bimetric maxillary  
44 distalizing arches and cervical headgear on dentofacial structures. *European Journal of*  
45 *Orthodontics* 29(1): 52–59
- 46 16. Andiappan M, Gao W, Bernabe E et al. (2015) Malocclusion, orthodontic treatment, and  
47 the Oral Health Impact Profile (OHIP-14): Systematic review and meta-analysis.  
48 [Review]. *Angle Orthodontist* 85(3): 493–500. doi: 10.2319/051414-348.1
- 49 17. Angelieri F, Franchi L, Cevidanes LH et al. (2014) Long-term treatment effects of the  
50 FR-2 appliance: a prospective evaluation 7 years post-treatment. *European Journal of*  
51 *Orthodontics* 36(2): 192–199. doi: 10.1093/ejo/cjt026
- 52 18. Anne, Mandall, N, Cousley R, DiBiase A et al. (2012) Is early Class III protraction  
53 facemask treatment effective? A multicentre, randomized, controlled trial: 3-year follow-  
54 up. *Journal of Orthodontics* 39(3): 176–185. doi: 10.1179/1465312512Z.00000000028
- 55 19. Anthony SN, Zimba K, Subramanian B (2018) Impact of Malocclusions on the Oral  
56 Health-Related Quality of Life of Early Adolescents in Ndola, Zambia. *International*  
57 *Journal of Dentistry* 2018: 7920973. doi: 10.1155/2018/7920973
- 58 20. Arraj GP, Rossi-Fedele G, Dođramacı EJ (2019) The association of overjet size and  
59 traumatic dental injuries-A systematic review and meta-analysis. *Dental Traumatology*  
60 35(4-5): 217–232. doi: 10.1111/edt.12481
- 61 21. Atik E, Gorucu-Coskuner H, Kocadereli I (2017) Dentoskeletal and airway effects of the  
62 X-Bow appliance versus removable functional appliances (Frankel-2 and Trainer) in  
63 prepubertal Class II division 1 malocclusion patients. *Aust. Orthod. J.* 33(1): 3–13
- 64 22. Baccetti T, De, Clerck, HJ, Cevidanes LH et al. (2011) Morphometric analysis of  
65 treatment effects of bone-anchored maxillary protraction in growing Class III patients.  
66 *European Journal of Orthodontics* 33(2): 121–125. doi: 10.1093/ejo/cjq170
- 67 23. Baccetti T, Franchi L, Cameron CG et al. (2001) Treatment timing for rapid maxillary  
68 expansion. *Angle Orthod.* 71(5): 343–350
- 69 24. Baccetti T, Franchi L, McNamara, JA, Jr (1999) Thin-plate spline analysis of treatment  
70 effects of rapid maxillary expansion and face mask therapy in early Class III  
71 malocclusions. *European Journal of Orthodontics* 21(3): 275–281
- 72 25. Baccetti T, Franchi L, McNamara, JA, Jr (2000) Treatment and posttreatment craniofacial  
73 changes after rapid maxillary expansion and facemask therapy. *American Journal of*  
74 *Orthodontics & Dentofacial Orthopedics* 118(4): 404–413
- 75 26. Baccetti T, Franchi L, Toth LR et al. (2000) Treatment timing for Twin-block therapy.  
76 *American Journal of Orthodontics & Dentofacial Orthopedics* 118(2): 159–170
- 77 27. Baccetti T, McGill JS, Franchi L et al. (1998) Skeletal effects of early treatment of Class  
78 III malocclusion with maxillary expansion and face-mask therapy. *American Journal of*  
79 *Orthodontics & Dentofacial Orthopedics* 113(3): 333–343
- 80 28. Baccetti T, Rey D, Oberti G et al. (2009) Long-term outcomes of Class III treatment with  
81 mandibular cervical headgear followed by fixed appliances. *Angle Orthodontist*  
82 79(5): 828–834. doi: 10.2319/111408-580.1

- 83 29. Baccetti T, Tollaro I (1998) A retrospective comparison of functional appliance treatment  
84 of Class III malocclusions in the deciduous and mixed dentitions. *European Journal of*  
85 *Orthodontics* 20(3): 309–317
- 86 30. Baik HS, Jee SH, Lee KJ et al. (2004) Treatment effects of Frankel functional regulator  
87 III in children with class III malocclusions. *American Journal of Orthodontics &*  
88 *Dentofacial Orthopedics* 125(3): 294–301
- 89 31. Baram D, Yang Y, Ren C et al. (2019) Orthodontic Treatment Need and the Psychosocial  
90 Impact of Malocclusion in 12-Year-Old Hong Kong Children. *TheScientificWorldJournal*  
91 2019: 2685437. doi: 10.1155/2019/2685437
- 92 32. Barrett AA, Baccetti T, McNamara,JA,Jr (2010) Treatment effects of the light-force  
93 chincup. *American Journal of Orthodontics & Dentofacial Orthopedics* 138(4): 468–476.  
94 doi: 10.1016/j.ajodo.2008.12.024
- 95 33. Basciftci FA, Uysal T, Buyukerkmen A et al. (2003) The effects of activator treatment on  
96 the craniofacial structures of Class II division 1 patients. *European Journal of*  
97 *Orthodontics* 25(1): 87–93
- 98 34. Bassarelli T, Franchi L, Defraia E et al. (2016) Dentoskeletal effects produced by a  
99 Jasper Jumper with an anterior bite plane. *Angle Orthodontist* 86(5): 775–781. doi:  
100 10.2319/110115-737.1
- 101 35. Bates CJ, McDonald JP (2005) The relationship between severity of obstructive sleep  
102 apnoea/hypopnoea syndrome (OSAHS) and lateral cephalometric radiograph values: a  
103 clinical diagnostic tool. *Surg. J. R. Coll. Surg. Edinb. Irel.* 3(5): 338–346. doi:  
104 10.1016/s1479-666x(05)80113-1
- 105 36. Batista KB, Thiruvengkatachari B, Harrison JE et al. (2018) Orthodontic treatment for  
106 prominent upper front teeth (Class II malocclusion) in children and adolescents.  
107 [Review]. *Cochrane Database of Systematic Reviews* 3: CD003452. doi:  
108 10.1002/14651858.CD003452.pub4
- 109 37. Battagel JM, Orton HS (1991) Class III malocclusion: a comparison of extraction and  
110 non-extraction techniques. *European Journal of Orthodontics* 13(3): 212–222
- 111 38. Battagel JM, Orton HS (1995) A comparative study of the effects of customized  
112 facemask therapy or headgear to the lower arch on the developing Class III face.  
113 *European Journal of Orthodontics* 17(6): 467–482
- 114 39. Bauss O, Freitag S, Röhling J et al. (2008) Influence of overjet and lip coverage on the  
115 prevalence and severity of incisor trauma. *J. Orofac. Orthop.* 69(6): 402–410. doi:  
116 10.1007/s00056-008-8805-1
- 117 40. Bavbek NC, Tuncer BB, Turkoz C et al. (2016) Changes in airway dimensions and hyoid  
118 bone position following class II correction with forsus fatigue resistant device. *Clin. Oral*  
119 *Investig.* 20(7): 1747–1755. doi: 10.1007/s00784-015-1659-1
- 120 41. Baysal A, Ozturk MA, Sahan AO et al. (2016) Facial soft-tissue changes after rapid  
121 maxillary expansion analyzed with 3-dimensional stereophotogrammetry: A randomized,  
122 controlled clinical trial. *Angle Orthodontist* 86(6): 934–942

- 123 42. Bernabe E, Sheiham A, Tsakos G et al. (2008) The impact of orthodontic treatment on  
124 the quality of life in adolescents: a case-control study. *European Journal of Orthodontics*  
125 30(5): 515–520. doi: 10.1093/ejo/cjn026
- 126 43. Bicakci AA, Agar U, Sokucu O et al. (2005) Nasal airway changes due to rapid maxillary  
127 expansion timing. *Angle Orthodontist* 75(1): 1–6
- 128 44. Bilbo EE, Marshall SD, Southard KA et al. (2018) Long-term skeletal effects of high-  
129 pull headgear followed by fixed appliances for the treatment of Class II malocclusions.  
130 *Angle Orthodontist* 88(5): 530–537. doi: 10.2319/091517-620.1
- 131 45. Borzabadi-Farahani A, Borzabadi-Farahani A (2011) The association between  
132 orthodontic treatment need and maxillary incisor trauma, a retrospective clinical study.  
133 *Oral Surg. Oral Med. Oral Pathol. Oral Radiol. Endod.* 112(6): e75-80. doi:  
134 10.1016/j.tripleo.2011.05.024
- 135 46. Borzabadi-Farahani A, Lane CJ, Yen SL (2014) Late maxillary protraction in patients  
136 with unilateral cleft lip and palate: a retrospective study. *Cleft Palate Craniofacial Journal*  
137 51(1): e1-e10. doi: 10.1597/12-099
- 138 47. Bourdiol P, Soulier-Peigue D, Lachaze P et al. (2017) Only severe malocclusion  
139 correlates with mastication deficiency. *Arch. Oral Biol.* 75: 14–20. doi:  
140 10.1016/j.archoralbio.2016.12.002
- 141 48. Bucci R, Montanaro D, Rongo R et al. (2019) Effects of maxillary expansion on the  
142 upper airways: Evidence from systematic reviews and meta-analyses. [Review]. *Journal*  
143 *of Oral Rehabilitation* 46(4): 377–387. doi: 10.1111/joor.12766
- 144 49. Burden DJ (1995) An investigation of the association between overjet size, lip coverage,  
145 and traumatic injury to maxillary incisors. *Eur. J. Orthodont.* 17(6): 513–517. doi:  
146 10.1093/ejo/17.6.513
- 147 50. Buyuknacar GB, Gulec A (2020) Correlation between the cephalometric measurements  
148 and acoustic properties of /s/ sound in Turkish. *J. Appl. Oral Sci.* 28: e20190399. doi:  
149 10.1590/1678-7757-2019-0399
- 150 51. Cacciatore G, Ghislanzoni LT, Alvetro L et al. (2014) Treatment and posttreatment  
151 effects induced by the Forsus appliance: A controlled clinical study. *Angle Orthodontist*  
152 84(6): 1010–1017. doi: 10.2319/112613-867.1
- 153 52. Chadwick SM, Aird JC, Taylor PJ et al. (2001) Functional regulator treatment of Class II  
154 division 1 malocclusions. *Eur. J. Orthodont.* 23(5): 495–505. doi: 10.1093/ejo/23.5.495
- 155 53. Chatzoudi MI, Ioannidou-Marathiotou I, Papadopoulos MA (2014) Clinical effectiveness  
156 of chin cup treatment for the management of Class III malocclusion in pre-pubertal  
157 patients: a systematic review and meta-analysis. [Review]. *Progress in Orthodontics*  
158 15: 62. doi: 10.1186/s40510-014-0062-9
- 159 54. Chen DR, McGorray SP, Dolce C et al. (2011) Effect of early Class II treatment on the  
160 incidence of incisor trauma. *American Journal of Orthodontics & Dentofacial*  
161 *Orthopedics* 140(4): e155-60. doi: 10.1016/j.ajodo.2011.02.023
- 162 55. Chen X, Liu D, Liu J et al. (2015) Three-Dimensional Evaluation of the Upper Airway  
163 Morphological Changes in Growing Patients with Skeletal Class III Malocclusion

- 164 Treated by Protraction Headgear and Rapid Palatal Expansion: A Comparative Research.  
165 PLoS ONE [Electronic Resource] 10(8): e0135273. doi: 10.1371/journal.pone.0135273
- 166 56. Chiqueto K, Henriques JF, Barros SE et al. (2013) Angle Class II correction with MARA  
167 appliance. *Dental Press Journal of Orthodontics* 18(1): 35–44
- 168 57. Choi T-H, Kim B-I, Chung CJ et al. (2015) Assessment of masticatory function in  
169 patients with non-sagittal occlusal discrepancies. *J. Oral Rehabil.* 42(1): 2–9. doi:  
170 10.1111/joor.12227
- 171 58. Cochrane Deutschland Stiftung, Institut für Evidenz in der Medizin, Institut für  
172 Medizinische Biometrie und Statistik, Freiburg et al. (2019) Manual systematische  
173 Recherche für Evidenzsynthesen und Leitlinien, Version 2.0
- 174 59. Cordasco G, Matarese G, Rustico L et al. (2014) Efficacy of orthopedic treatment with  
175 protraction facemask on skeletal Class III malocclusion: a systematic review and meta-  
176 analysis. [Review]. *Orthodontics & Craniofacial Research* 17(3): 133–143. doi:  
177 10.1111/ocr.12040
- 178 60. Corrêa-Faria P, Martins CC, Bönecker M et al. (2016) Clinical factors and socio-  
179 demographic characteristics associated with dental trauma in children: a systematic  
180 review and meta-analysis. *Dent Traumatol* 32(5): 367–378. doi: 10.1111/edt.12268
- 181 61. Cozza P, Baccetti T, Mucedero M et al. (2010) Treatment and posttreatment effects of a  
182 facial mask combined with a bite-block appliance in Class III malocclusion. *American*  
183 *Journal of Orthodontics & Dentofacial Orthopedics* 138(3): 300–310. doi:  
184 10.1016/j.ajodo.2010.05.001
- 185 62. Cozza P, De, Toffol, L, Colagrossi S (2004) Dentoskeletal effects and facial profile  
186 changes during activator therapy. *European Journal of Orthodontics* 26(3): 293–302
- 187 63. Croft RS, Buschang PH, English JD et al. (1999) A cephalometric and tomographic  
188 evaluation of Herbst treatment in the mixed dentition. *American Journal of Orthodontics*  
189 *& Dentofacial Orthopedics* 116(4): 435–443
- 190 64. Danaei SM, Ajami S, Etemadi H et al. (2018) Assessment of the effect of maxillary  
191 protraction appliance on pharyngeal airway dimensions in relation to changes in tongue  
192 posture. *Dental Research Journal* 15(3): 208–214
- 193 65. de, Almeida, MR, Flores-Mir C, Brandao AG et al. (2008) Soft tissue changes produced  
194 by a banded-type Herbst appliance in late mixed dentition patients. *World Journal of*  
195 *Orthodontics* 9(2): 121–131
- 196 66. De, Clerck, H, Cevidanes L, Baccetti T (2010) Dentofacial effects of bone-anchored  
197 maxillary protraction: a controlled study of consecutively treated Class III patients.  
198 *American Journal of Orthodontics & Dentofacial Orthopedics* 138(5): 577–581. doi:  
199 10.1016/j.ajodo.2009.10.037
- 200 67. de, Oliveira, CM, Sheiham A (2004) Orthodontic treatment and its impact on oral health-  
201 related quality of life in Brazilian adolescents. *Journal of Orthodontics* 31(1): 20-7;  
202 discussion 15
- 203 68. Defraia E, Marinelli A, Baroni G et al. (2008) Dentoskeletal effects of a removable  
204 appliance for expansion of the maxillary arch: a postero-anterior cephalometric study.  
205 *European Journal of Orthodontics* 30(1): 57–60

- 206 69. Deguchi T, McNamara JA (1999) Craniofacial adaptations induced by chin cup therapy in  
207 Class III patients. *American Journal of Orthodontics & Dentofacial Orthopedics*  
208 115(2): 175–182
- 209 70. Dimberg L, Arnrup K, Bondemark L (2015) The impact of malocclusion on the quality  
210 of life among children and adolescents: a systematic review of quantitative studies.  
211 [Review]. *European Journal of Orthodontics* 37(3): 238–247. doi: 10.1093/ejo/cju046
- 212 71. Dogan S (2012) The effects of face mask therapy in cleft lip and palate patients. *Annals*  
213 *of Maxillofacial Surgery* 2(2): 116–120. doi: 10.4103/2231-0746.101332
- 214 72. Dorri M (2015) In children with prominent lower front teeth (class III malocclusion),  
215 how does orthodontic treatment affect outcomes? *Cochrane Clinical Answers*. doi:  
216 10.1002/cca.996
- 217 73. Doshi UH, Bhad-Patil WA (2011) Speech defect and orthodontics: a contemporary  
218 review. *Orthodontics : The Art and Practice of Dentofacial Enhancement* 12(4): 340–353
- 219 74. Duarte-Rodrigues L, Ramos-Jorge ML, Alves-Duarte AC et al. (2020) Oral disorders  
220 associated with the experience of verbal bullying among Brazilian school-aged children:  
221 A case-control study. *Journal of the American Dental Association* 151(6): 399–406. doi:  
222 10.1016/j.adaj.2020.02.001
- 223 75. Ehmer U, Tulloch CJ, Proffit WR et al. (1999) An international comparison of early  
224 treatment of angle Class-II/1 cases. Skeletal effects of the first phase of a prospective  
225 clinical trial. *Journal of Orofacial Orthopedics* 60(6): 392–408
- 226 76. Eissa O, ElShennawy M, Gaballah S et al. (2018) Treatment of Class III malocclusion  
227 using miniscrew-anchored inverted Forsus FRD: Controlled clinical trial. *Angle*  
228 *Orthodontist* 88(6): 692–701. doi: 10.2319/110717-760.1
- 229 77. Eissa O, El-Shennawy M, Gaballah S et al. (2017) Treatment outcomes of Class II  
230 malocclusion cases treated with miniscrew-anchored Forsus Fatigue Resistant Device: A  
231 randomized controlled trial. *Angle Orthodontist* 87(6): 824–833. doi: 10.2319/032717-  
232 214.1
- 233 78. Elfeky HY, Fayed MS, AlHammadi MS et al. (2018) Three-dimensional skeletal,  
234 dentoalveolar and temporomandibular joint changes produced by Twin Block functional  
235 appliance. *J. Orofac. Orthop.* 79(4): 245–258. doi: 10.1007/s00056-018-0137-1
- 236 79. ElKordy SA, Abouelezz AM, Fayed MM et al. (2016) Three-dimensional effects of the  
237 mini-implant-anchored Forsus Fatigue Resistant Device: A randomized controlled trial.  
238 *Angle Orthodontist* 86(2): 292–305. doi: 10.2319/012515-55.1
- 239 80. ElKordy SA, Abouelezz AM, Fayed MM et al. (2019) Evaluation of the miniplate-  
240 anchored Forsus Fatigue Resistant Device in skeletal Class II growing subjects: A  
241 randomized controlled trial. *Angle Orthodontist* 89(3): 391–403. doi: 10.2319/062018-  
242 468.1
- 243 81. English JD, Buschang PH, Throckmorton GS (2002) Does malocclusion affect  
244 masticatory performance? *Angle Orthod.* 72(1): 21–27. doi: 10.1043/0003-  
245 3219(2002)072<0021:DMAMP>2.0.CO;2

- 246 82. Entrenas I, Gonzalez-Chamorro E, Alvarez-Abad C et al. (2019) Evaluation of changes  
247 in the upper airway after Twin Block treatment in patients with Class II malocclusion.  
248 *Clinical & Experimental Dental Research* 5(3): 259–268. doi: 10.1002/cre2.180
- 249 83. Erdinc AE, Ugur T, Erbay E (1999) A comparison of different treatment techniques for  
250 posterior crossbite in the mixed dentition. *Am. J. Orthod. Dentofac. Orthop.* 116(3): 287–  
251 300. doi: 10.1016/S0889-5406(99)70240-4
- 252 84. Faco R, Yatabe M, Cevidanes LH et al. (2019) Bone-anchored maxillary protraction in  
253 unilateral cleft lip and palate: a cephalometric appraisal. *European Journal of*  
254 *Orthodontics* 019. doi: 10.1093/ejo/cjz005
- 255 85. Falck F, Zimmermann-Menzel K (2008) Cephalometric changes in the treatment of Class  
256 III using the Frankel appliance. *J. Orofac. Orthop.* 69(2): 99–109. doi: 10.1007/s00056-  
257 008-0716-7
- 258 86. Faltin KJ, Faltin RM, Baccetti T et al. (2003) Long-term effectiveness and treatment  
259 timing for Bionator therapy. *Angle Orthodontist* 73(3): 221–230
- 260 87. Farronato G, Giannini L, Riva R et al. (2012) Correlations between malocclusions and  
261 dyslalias. *European Journal of Paediatric Dentistry* 13(1): 13–18
- 262 88. Feldens CA, Borges TS, Vargas-Ferreira F et al. (2016) Risk factors for traumatic dental  
263 injuries in the primary dentition: concepts, interpretation, and evidence. *Dental*  
264 *Traumatology* 32(6): 429–437. doi: 10.1111/edt.12281
- 265 89. Feng X, Li J, Li Y et al. (2012) Effectiveness of TAD-anchored maxillary protraction in  
266 late mixed dentition A systematic review. *Angle Orthod.* 82(6): 1107–1114. doi:  
267 10.2319/111411-705.1
- 268 90. Ferrando-Magraner E, Garcia-Sanz V, Bellot-Arcis C et al. (2019) Oral health-related  
269 quality of life of adolescents after orthodontic treatment. A systematic review. [Review].  
270 *Journal of Clinical & Experimental Dentistry* 11(2): e194-e202. doi: 10.4317/jced.55527
- 271 91. Firouz M, Zernik J, Nanda R (1992) Dental and orthopedic effects of high-pull headgear  
272 in treatment of Class II, division 1 malocclusion. *American Journal of Orthodontics &*  
273 *Dentofacial Orthopedics* 102(3): 197–205
- 274 92. Flores-Mir C, Ayeh A, Goswami A et al. (2007) Skeletal and dental changes in Class II  
275 division 1 malocclusions treated with splint-type Herbst appliances. A systematic review.  
276 [Review] [36 refs]. *Angle Orthodontist* 77(2): 376–381
- 277 93. Flores-Mir C, Barnett G, Higgins DW et al. (2009) Short-term skeletal and dental effects  
278 of the Xbow appliance as measured on lateral cephalograms. *American Journal of*  
279 *Orthodontics & Dentofacial Orthopedics* 136(6): 822–832. doi:  
280 10.1016/j.ajodo.2008.01.021
- 281 94. Flores-Mir C, Major MP, Major PW (2006) Soft tissue changes with fixed functional  
282 appliances in Class II division 1. [Review] [46 refs]. *Angle Orthodontist* 76(4): 712–720
- 283 95. Flores-Mir C, Major PW (2006) Cephalometric facial soft tissue changes with the twin  
284 block appliance in Class II division 1 malocclusion patients. A systematic review.  
285 [Review] [39 refs]. *Angle Orthodontist* 76(5): 876–881

- 286 96. Franchi L, Alvetro L, Giuntini V et al. (2011) Effectiveness of comprehensive fixed  
287 appliance treatment used with the Forsus Fatigue Resistant Device in Class II patients.  
288 *Angle Orthodontist* 81(4): 678–683. doi: 10.2319/102710-629.1
- 289 97. Franchi L, Baccetti T, Cameron CG et al. (2002) Thin-plate spline analysis of the short-  
290 and long-term effects of rapid maxillary expansion. *Eur. J. Orthodont.* 24(2): 143–150.  
291 doi: 10.1093/ejo/24.2.143
- 292 98. Franchi L, Baccetti T, McNamara JA (2004) Postpubertal assessment of treatment timing  
293 for maxillary expansion and protraction therapy followed by fixed appliances. *American*  
294 *Journal of Orthodontics & Dentofacial Orthopedics* 126(5): 555–568
- 295 99. Franchi L, Baccetti T, McNamara,JA,Jr (1998) Shape-coordinate analysis of skeletal  
296 changes induced by rapid maxillary expansion and facial mask therapy. *American*  
297 *Journal of Orthodontics & Dentofacial Orthopedics* 114(4): 418–426
- 298 100. Franchi L, Pavoni C, Faltin,K,Jr et al. (2013) Long-term skeletal and dental effects and  
299 treatment timing for functional appliances in Class II malocclusion. *Angle Orthodontist*  
300 83(2): 334–340. doi: 10.2319/052912-450.1
- 301 101. Freeman DC, McNamara,JA,Jr, Baccetti T et al. (2009) Long-term treatment effects of  
302 the FR-2 appliance of Frankel. *American Journal of Orthodontics & Dentofacial*  
303 *Orthopedics* 135(5): 570.e1-6; discussion 570-1. doi: 10.1016/j.ajodo.2007.11.029
- 304 102. Gameiro GH, Magalhaes IB, Szymanski MM et al. (2017) Is the main goal of  
305 mastication achieved after orthodontic treatment? A prospective longitudinal study.  
306 *Dental Press Journal of Orthodontics* 22(3): 72–78. doi: 10.1590/2177-6709.22.3.072-  
307 078.oar
- 308 103. Garattini G, Levrini L, Crozzoli P et al. (1998) Skeletal and dental modifications  
309 produced by the Bionator III appliance. *Am. J. Orthod. Dentofac. Orthop.* 114(1): 40–44.  
310 doi: 10.1016/S0889-5406(98)70235-5
- 311 104. Gencer D, Kaygisiz E, Yuksel S et al. (2015) Comparison of double-plate  
312 appliance/facemask combination and facemask therapy in treating class III  
313 malocclusions. *Angle Orthodontist* 85(2): 278–283. doi: 10.2319/013114-83.1
- 314 105. Geran RG, McNamara,JA,Jr, Baccetti T et al. (2006) A prospective long-term study on  
315 the effects of rapid maxillary expansion in the early mixed dentition. *American Journal*  
316 *of Orthodontics & Dentofacial Orthopedics* 129(5): 631–640
- 317 106. Ghislanzoni LT, Baccetti T, Toll D et al. (2013) Treatment timing of MARA and fixed  
318 appliance therapy of Class II malocclusion. *European Journal of Orthodontics*  
319 35(3): 394–400. doi: 10.1093/ejo/cjs023
- 320 107. Ghislanzoni LT, Toll DE, Defraia E et al. (2011) Treatment and posttreatment outcomes  
321 induced by the Mandibular Advancement Repositioning Appliance; a controlled clinical  
322 study. *Angle Orthodontist* 81(4): 684–691. doi: 10.2319/111010-656.1
- 323 108. Giuntini V, Vangelisti A, Masucci C et al. (2015) Treatment effects produced by the  
324 Twin-block appliance vs the Forsus Fatigue Resistant Device in growing Class II  
325 patients. *Angle Orthodontist* 85(5): 784–789. doi: 10.2319/090514-624.1



- 326 109. Glasl B, Ludwig B, Schopf P (2006) Prevalence and development of KIG-relevant  
327 symptoms in primary school students from Frankfurt am Main. *Journal of Orofacial*  
328 *Orthopedics* 67(6): 414–423
- 329 110. Godoy F, Godoy-Bezerra J, Rosenblatt A (2011) Treatment of posterior crossbite  
330 comparing 2 appliances: a community-based trial. *American Journal of Orthodontics &*  
331 *Dentofacial Orthopedics* 139(1): e45-52. doi: 10.1016/j.ajodo.2010.06.017
- 332 111. Goyenc Y, Ersoy S (2004) The effect of a modified reverse headgear force applied with a  
333 facebow on the dentofacial structures. *European Journal of Orthodontics* 26(1): 51–57
- 334 112. Guest SS, McNamara,JA,Jr, Baccetti T et al. (2010) Improving Class II malocclusion as  
335 a side-effect of rapid maxillary expansion: a prospective clinical study. *American Journal*  
336 *of Orthodontics & Dentofacial Orthopedics* 138(5): 582–591. doi:  
337 10.1016/j.ajodo.2008.12.026
- 338 113. Guimaraes,CH,Jr, Henriques JF, Janson G et al. (2013) Prospective study of  
339 dentoskeletal changes in Class II division malocclusion treatment with twin force bite  
340 corrector. *Angle Orthodontist* 83(2): 319–326. doi: 10.2319/042312-339.1
- 341 114. Hanoun A, Al-Jewair TS, Tabbaa S et al. (2014) A comparison of the treatment effects of  
342 the Forsus Fatigue Resistance Device and the Twin Block appliance in patients with class  
343 II malocclusions. *Clinical Cosmetic & Investigational Dentistry* 6: 57–63. doi:  
344 10.2147/CCIDE.S64119
- 345 115. Hansson C, Skold B, Linder-Aronson S (1997) Treatment of adolescents with  
346 Hansaplate/headgear. Influence on face in profile and on dentition. *Journal of Orofacial*  
347 *Orthopedics* 58(1): 16–29
- 348 116. Harrison JE, Ashby D (2001) Orthodontic treatment for posterior crossbites. [Review]  
349 [43 refs]. *Cochrane Database of Systematic Reviews*(1): CD000979
- 350 117. Hassan AH, Amin H-S (2010) Association of orthodontic treatment needs and oral  
351 health-related quality of life in young adults. *American Journal of Orthodontics &*  
352 *Dentofacial Orthopedics* 137(1): 42–47. doi: 10.1016/j.ajodo.2008.02.024
- 353 118. Heinrichs DA, Shammaa I, Martin C et al. (2014) Treatment effects of a fixed  
354 intermaxillary device to correct class II malocclusions in growing patients. *Progress in*  
355 *Orthodontics* 15: 45. doi: 10.1186/s40510-014-0045-x
- 356 119. Helm S, Kreiborg S, Solow B (1985) Psychosocial implications of malocclusion: a 15-  
357 year follow-up study in 30-year-old Danes. *American Journal of Orthodontics*  
358 87(2): 110–118. doi: 10.1016/0002-9416(85)90020-x
- 359 120. Huynh NT, Morton PD, Rompré PH et al. (2011) Associations between sleep-disordered  
360 breathing symptoms and facial and dental morphometry, assessed with screening  
361 examinations. *American Journal of Orthodontics & Dentofacial Orthopedics*  
362 140(6): 762–770. doi: 10.1016/j.ajodo.2011.03.023
- 363 121. Iwasaki T, Takemoto Y, Inada E et al. (2014) Three-dimensional cone-beam computed  
364 tomography analysis of enlargement of the pharyngeal airway by the Herbst appliance.  
365 *Am. J. Orthod. Dentofac. Orthop.* 146(6): 776–785. doi: 10.1016/j.ajodo.2014.08.017

- 366 122. Jakobsone G, Latkauskiene D, McNamara Jr JA (2013) Mechanisms of Class II  
367 correction induced by the crown Herbst appliance as a single-phase Class II therapy: 1  
368 year follow-up. *Progress in Orthodontics* 14(1). doi: 10.1186/2196-1042-14-27
- 369 123. Jamilian A, Kiaee B, Sanayei S et al. (2016) Orthodontic Treatment of Malocclusion and  
370 its Impact on Oral Health-Related Quality of Life. *The open dentistry journal* 10: 236–  
371 241. doi: 10.2174/1874210601610010236
- 372 124. Janson GR, daSilva,CC, Bergersen EO et al. (2000) Eruption Guidance Appliance  
373 effects in the treatment of Class II, Division 1 malocclusions. *American Journal of*  
374 *Orthodontics & Dentofacial Orthopedics* 117(2): 119–129
- 375 125. Janson GR, Toruno JL, Martins DR et al. (2003) Class II treatment effects of the Frankel  
376 appliance. *European Journal of Orthodontics* 25(3): 301–309
- 377 126. Järvinen S (1978) Incisal overjet and traumatic injuries to upper permanent incisors. A  
378 retrospective study. *Acta Odontologica Scandinavica* 36(6): 359–362. doi:  
379 10.3109/00016357809029088
- 380 127. Järvinen S (1979) Traumatic injuries to upper permanent incisors related to age and  
381 incisal overjet. A retrospective study. *Acta Odontologica Scandinavica* 37(6): 335–338.  
382 doi: 10.3109/00016357909004705
- 383 128. Javidi H, Vettore M, Benson PE (2017) Does orthodontic treatment before the age of 18  
384 years improve oral health-related quality of life? A systematic review and meta-analysis.  
385 *Am. J. Orthod. Dentofac. Orthop.* 151(4): 644–655. doi: 10.1016/j.ajodo.2016.12.011
- 386 129. Jena AK, Duggal R (2010) Treatment Effects of Twin-Block and Mandibular Protraction  
387 Appliance-IV in the Correction of Class II Malocclusion. *Angle Orthod.* 80(3): 485–491.  
388 doi: 10.2319/062709-359.1
- 389 130. Jena AK, Duggal R, Parkash H (2006) Skeletal and dentoalveolar effects of Twin-block  
390 and bionator appliances in the treatment of Class II malocclusion: a comparative study.  
391 *American Journal of Orthodontics & Dentofacial Orthopedics* 130(5): 594–602
- 392 131. Johnson NC, Sandy JR (1999) Tooth position and speech--is there a relationship? *Angle*  
393 *Orthodontist* 69(4): 306–310. doi: 10.1043/0003-  
394 3219(1999)069<0306:TPASIT>2.3.CO;2
- 395 132. Julku J, Pirila-Parkkinen K, Pirttiniemi P (2018) Airway and hard tissue dimensions in  
396 children treated with early and later timed cervical headgear-a randomized controlled  
397 trial. *European Journal of Orthodontics* 40(3): 285–295. doi: 10.1093/ejo/cjx088
- 398 133. Jung M-H (2010) Evaluation of the effects of malocclusion and orthodontic treatment on  
399 self-esteem in an adolescent population. *American Journal of Orthodontics & Dentofacial*  
400 *Orthopedics* 138(2): 160–166. doi: 10.1016/j.ajodo.2008.08.040
- 401 134. Kajiyama K, Murakami T, Suzuki A (2000) Evaluation of the modified maxillary  
402 protractor applied to Class III malocclusion with retruded maxilla in early mixed  
403 dentition. *American Journal of Orthodontics & Dentofacial Orthopedics* 118(5): 549–559
- 404 135. Kajiyama K, Murakami T, Suzuki A (2004) Comparison of orthodontic and orthopedic  
405 effects of a modified maxillary protractor between deciduous and early mixed dentitions.  
406 *American Journal of Orthodontics & Dentofacial Orthopedics* 126(1): 23–32

- 407 136. Kaluza S, Hiller K-A, Proff P et al. (2019) Draft search strategies for "Relapse in  
408 orthognathic surgery: a systematic review and meta-analysis". Universität Regensburg
- 409 137. Kama JD, Ozer T, Baran S (2006) Orthodontic and orthopaedic changes associated with  
410 treatment in subjects with Class III malocclusions. *European Journal of Orthodontics*  
411 28(5): 496–502
- 412 138. Kamal AT, Fida M (2019) Evaluation of cervical spine posture after functional therapy  
413 with twin-block appliances: A retrospective cohort study. *Am. J. Orthod. Dentofac.*  
414 *Orthop.* 155(5): 656–661. doi: 10.1016/j.ajodo.2018.06.012
- 415 139. Kang Y, Franchi L, Manton DJ et al. (2018) A cephalometric study of the skeletal and  
416 dento-alveolar effects of the modified Louisiana State University activator in Class II  
417 malocclusion. *Eur. J. Orthodont.* 40(2): 164–175. doi: 10.1093/ejo/cjx044
- 418 140. Kania MJ, Keeling SD, McGorray SP et al. (1996) Risk factors associated with incisor  
419 injury in elementary school children. *Angle Orthod.* 66(6): 423–432. doi: 10.1043/0003-  
420 3219(1996)066<0423:RFAWII>2.3.CO;2
- 421 141. Khosravanifard B, Ghanbari-Azarnir S, Rakhshan H et al. (2012) Association between  
422 orthodontic treatment need and masticatory performance. *Orthodontics : The Art and*  
423 *Practice of Dentofacial Enhancement* 13(1): e20-8
- 424 142. Kilinc AS, Arslan SG, Kama JD et al. (2008) Effects on the sagittal pharyngeal  
425 dimensions of protraction and rapid palatal expansion in Class III malocclusion subjects.  
426 *European Journal of Orthodontics* 30(1): 61–66
- 427 143. Kim Y-J, Hong J-S, Hwang Y-I et al. (2010) Three-dimensional analysis of pharyngeal  
428 airway in preadolescent children with different anteroposterior skeletal patterns.  
429 *American Journal of Orthodontics & Dentofacial Orthopedics* 137(3): 306.e1-11;  
430 discussion 306-7. doi: 10.1016/j.ajodo.2009.10.025
- 431 144. Kim-Berman H, McNamara,JA,Jr, Lints JP et al. (2019) Treatment effects of the Carriere  
432 Motion 3DTM appliance for the correction of Class II malocclusion in adolescents.  
433 *Angle Orthodontist* 019. doi: 10.2319/121418-872.1
- 434 145. Kobayashi T, Honma K, Nakajima T et al. (1993) Masticatory function in patients with  
435 mandibular prognathism before and after orthognathic surgery. *Journal of Oral &*  
436 *Maxillofacial Surgery* 51(9): 997-1001; discussion 1002-3. doi: 10.1016/s0278-  
437 2391(10)80043-6
- 438 146. Kobayashi T, Honma K, Shingaki S et al. (2001) Changes in masticatory function after  
439 orthognathic treatment in patients with mandibular prognathism. *Br. J. Oral Maxillofac.*  
440 *Surg.* 39(4): 260–265. doi: 10.1054/bjom.2000.0576
- 441 147. Koike S, Sujino T, Ohmori H et al. (2013) Gastric emptying rate in subjects with  
442 malocclusion examined by (13) C breath test. *J. Oral Rehabil.* 40(8): 574–581. doi:  
443 10.1111/joor.12073
- 444 148. Kragt L, Dharmo B, Wolvius EB et al. (2016) The impact of malocclusions on oral  
445 health-related quality of life in children-a systematic review and meta-analysis. *Clin. Oral*  
446 *Investig.* 20(8): 1881–1894. doi: 10.1007/s00784-015-1681-3

- 447 149. Kragt L, Jaddoe V, Wolvius E et al. (2017) The association of subjective orthodontic  
448 treatment need with oral health-related quality of life. *Community Dentist. Oral*  
449 *Epidemiol.* 45(4): 365–371. doi: 10.1111/cdoe.12299
- 450 150. Kucukkeles N, Ilhan I, Orgun IA (2007) Treatment efficiency in skeletal Class II patients  
451 treated with the jasper jumper. *Angle Orthodontist* 77(3): 449–456
- 452 151. Kunz F, Platte P, Keß S et al. (2018) Correlation between oral health-related quality of  
453 life and orthodontic treatment need in children and adolescents-a prospective  
454 interdisciplinary multicentre cohort study (Zusammenhang zwischen  
455 mundgesundheitsbezogener Lebensqualität und kieferorthopädischem  
456 Behandlungsbedarf bei Kindern und Jugendlichen – Eine prospektive, interdisziplinäre  
457 und multizentrische Kohortenstudie). *Journal of Orofacial Orthopedics* 79(5): 297–308.  
458 doi: 10.1007/s00056-018-0142-4
- 459 152. Kunz F, Platte P, Keß S et al. (2019) Auswirkungen spezifischer kieferorthopädischer  
460 Parameter auf die mundgesundheitsbezogene Lebensqualität von Kindern und  
461 Jugendlichen : Eine prospektive, interdisziplinäre und multizentrische Kohortenstudie  
462 (Impact of specific orthodontic parameters on the oral health-related quality of life in  
463 children and adolescents : A prospective interdisciplinary, multicentre, cohort study). *J*  
464 *Orofac Orthop* 80(4): 174–183. doi: 10.1007/s00056-019-00181-x
- 465 153. LaHaye MB, Buschang PH, Alexander RG et al. (2006) Orthodontic treatment changes  
466 of chin position in Class II Division 1 patients. *American Journal of Orthodontics &*  
467 *Dentofacial Orthopedics* 130(6): 732–741
- 468 154. Lange DW, Kalra V, Broadbent, BH, Jr et al. (1995) Changes in soft tissue profile  
469 following treatment with the bionator. *Angle Orthodontist* 65(6): 423–430
- 470 155. Laranjo F, Pinho T (2014) Cephalometric study of the upper airways and dentoalveolar  
471 height in open bite patients. *International Orthodontics* 12(4): 467–482. doi:  
472 10.1016/j.ortho.2014.10.005
- 473 156. Latkauskiene D, Jakobson G (2012) Immediate post-treatment crowned Herbst effects  
474 in growing patients. *Stomatologija* 14(3): 89–92
- 475 157. Lee D-H, Yu H-S (2012) Masseter muscle changes following orthognathic surgery A  
476 long-term three-dimensional computed tomography follow-up. *Angle Orthod.*  
477 82(5): 792–798. doi: 10.2319/111911-717.1
- 478 158. Lee W-C, Tu Y-K, Huang C-S et al. (2018) Pharyngeal airway changes following  
479 maxillary expansion or protraction: A meta-analysis. *Orthod. Craniofac. Res.* 21(1): 4–  
480 11. doi: 10.1111/ocr.12208
- 481 159. Levin AS, McNamara, JA, Jr, Franchi L et al. (2008) Short-term and long-term treatment  
482 outcomes with the FR-3 appliance of Frankel. *American Journal of Orthodontics &*  
483 *Dentofacial Orthopedics* 134(4): 513–524. doi: 10.1016/j.ajodo.2006.10.036
- 484 160. Li L, Liu H, Cheng H et al. (2014) CBCT evaluation of the upper airway morphological  
485 changes in growing patients of class II division 1 malocclusion with mandibular retrusion  
486 using twin block appliance: a comparative research. *PLoS ONE [Electronic Resource]*  
487 9(4): e94378. doi: 10.1371/journal.pone.0094378

- 488 161. Lin HC, Chang HP, Chang HF (2007) Treatment effects of occipitomenal anchorage  
489 appliance of maxillary protraction combined with chin cup traction in children with Class  
490 III malocclusion. *Journal of the Formosan Medical Association* 106(5): 380–391
- 491 162. Lippold C, Stamm T, Meyer U et al. (2013) Early treatment of posterior crossbite--a  
492 randomised clinical trial. *Trials [Electronic Resource]* 14: 20. doi: 10.1186/1745-6215-  
493 14-20
- 494 163. Lisson JA, Mokrys K, Kinzinger GS et al. (2013) Changes in soft-tissue profiles after  
495 treatment of class II/1 patients with bite-jumping appliances. *Journal of Orofacial*  
496 *Orthopedics* 74(2): 113–123. doi: 10.1007/s00056-012-0128-6
- 497 164. Liu Z, McGrath C, Hägg U (2009) The impact of malocclusion/orthodontic treatment  
498 need on the quality of life. A systematic review. *Angle Orthodontist* 79(3): 585–591. doi:  
499 10.2319/042108-224.1
- 500 165. Liu ZP, Li CJ, Hu HK et al. (2011) Efficacy of short-term chin cup therapy for  
501 mandibular growth retardation in Class III malocclusion. [Review]. *Angle Orthodontist*  
502 81(1): 162–168. doi: 10.2319/050510-244.1
- 503 166. Lombardo G, Vena F, Negri P et al. (2020) Worldwide prevalence of malocclusion in the  
504 different stages of dentition: A systematic review and meta-analysis. *Eur. J. Paediatr.*  
505 *Dent.* 21(2): 115–122. doi: 10.23804/ejpd.2020.21.02.05
- 506 167. Lucchese A, Carinci F, Brunelli G (2012) SKELETAL EFFECTS INDUCED BY TWIN  
507 BLOCK IN THERAPY OF CLASS II MALOCCLUSION. *Eur. J. Inflamm.* 10(1): 83–  
508 87
- 509 168. Lund DI, Sandler PJ (1998) The effects of Twin Blocks: a prospective controlled study.  
510 *American Journal of Orthodontics & Dentofacial Orthopedics* 113(1): 104–110
- 511 169. Lux CJ, Ducker B, Pritsch M et al. (2009) Occlusal status and prevalence of occlusal  
512 malocclusion traits among 9-year-old schoolchildren. *Eur. J. Orthodont.* 31(3): 294–299.  
513 doi: 10.1093/ejo/cjn116
- 514 170. Lux CJ, Rubel J, Starke J et al. (2001) Effects of early activator treatment in patients with  
515 class II malocclusion evaluated by thin-plate spline analysis. *Angle Orthodontist*  
516 71(2): 120–126
- 517 171. Macdonald KE, Kapust AJ, Turley PK (1999) Cephalometric changes after the correction  
518 of Class III malocclusion with maxillary expansion facemask therapy. *Am. J. Orthod.*  
519 *Dentofac. Orthop.* 116(1): 13–24. doi: 10.1016/S0889-5406(99)70298-2
- 520 172. Magalhães IB, Pereira LJ, Marques LS et al. (2010) The influence of malocclusion on  
521 masticatory performance. A systematic review. *Angle Orthodontist* 80(5): 981–987. doi:  
522 10.2319/011910-33.1
- 523 173. Magno MB, Nadelman P, Leite, Karla Lorene de França et al. (2020) Associations and  
524 risk factors for dental trauma: A systematic review of systematic reviews. *Community*  
525 *Dentist. Oral Epidemiol.* doi: 10.1111/cdoe.12574
- 526 174. Malta LA, Baccetti T, Franchi L et al. (2010) Long-term dentoskeletal effects and facial  
527 profile changes induced by bionator therapy. *Angle Orthodontist* 80(1): 10–17. doi:  
528 10.2319/031609-156.1

- 529 175. Mandall N, Cousley R, DiBiase A et al. (2016) Early class III protraction facemask  
530 treatment reduces the need for orthognathic surgery: a multi-centre, two-arm parallel  
531 randomized, controlled trial. *Journal of Orthodontics* 43(3): 164–175. doi:  
532 10.1080/14653125.2016.1201302
- 533 176. Mandall N, DiBiase A, Littlewood S et al. (2010) Is early Class III protraction facemask  
534 treatment effective? A multicentre, randomized, controlled trial: 15-month follow-up.  
535 *Journal of Orthodontics* 37(3): 149–161. doi: 10.1179/14653121043056
- 536 177. Mandall NA, McCord JF, Blinkhorn AS et al. (2000) Perceived aesthetic impact of  
537 malocclusion and oral self-perceptions in 14-15-year-old Asian and Caucasian children  
538 in greater Manchester. *European Journal of Orthodontics* 22(2): 175–183
- 539 178. Mantysaari R, Kantomaa T, Pirttiniemi P et al. (2004) The effects of early headgear  
540 treatment on dental arches and craniofacial morphology: a report of a 2 year randomized  
541 study. *European Journal of Orthodontics* 26(1): 59–64
- 542 179. Marquezin MCS, Kobayashi FY, Montes ABM et al. (2013) Assessment of masticatory  
543 performance, bite force, orthodontic treatment need and orofacial dysfunction in children  
544 and adolescents. *Arch. Oral Biol.* 58(3): 286–292. doi:  
545 10.1016/j.archoralbio.2012.06.018
- 546 180. Marsico E, Gatto E, Burrascano M et al. (2011) Effectiveness of orthodontic treatment  
547 with functional appliances on mandibular growth in the short term. [Review]. *American*  
548 *Journal of Orthodontics & Dentofacial Orthopedics* 139(1): 24–36. doi:  
549 10.1016/j.ajodo.2010.04.028
- 550 181. Martina R, Cioffi I, Galeotti A et al. (2013) Efficacy of the Sander bite-jumping  
551 appliance in growing patients with mandibular retrusion: a randomized controlled trial.  
552 *Orthodontics & Craniofacial Research* 16(2): 116–126. doi: 10.1111/ocr.12013
- 553 182. Martina R, D'Anto V, De, Simone, V et al. (2019) Cephalometric outcomes of a new  
554 orthopaedic appliance for Class III malocclusion treatment. *European Journal of*  
555 *Orthodontics* 019. doi: 10.1093/ejo/cjz037
- 556 183. Masood M, Masood Y, Newton T (2014) Cross-bite and oral health related quality of life  
557 in young people. *J. Dent.* 42(3): 249–255. doi: 10.1016/j.jdent.2013.12.004
- 558 184. Maspero C, Giannini L, Galbiati G et al. (2015) Upper airway obstruction in class II  
559 patients. Effects of Andresen activator on the anatomy of pharyngeal airway passage.  
560 Cone beam evaluation. *Stomatologija* 17(4): 124–130
- 561 185. Maspero C, Prevedello C, Giannini L et al. (2014) Atypical swallowing: a review.  
562 *Minerva Stomatologica* 63(6): 217–227
- 563 186. Masucci C, Franchi L, Giuntini V et al. (2014) Short-term effects of a modified Alt-  
564 RAMEC protocol for early treatment of Class III malocclusion: a controlled study.  
565 *Orthodontics & Craniofacial Research* 17(4): 259–269. doi: 10.1111/ocr.12051
- 566 187. McNamara, JA, Jr, Sigler LM, Franchi L et al. (2010) Changes in occlusal relationships in  
567 mixed dentition patients treated with rapid maxillary expansion. A prospective clinical  
568 study. *Angle Orthodontist* 80(2): 230–238. doi: 10.2319/040309-192.1

- 569 188. Merwin D, Ngan P, Hagg U et al. (1997) Timing for effective application of anteriorly  
570 directed orthopedic force to the maxilla. *American Journal of Orthodontics &*  
571 *Dentofacial Orthopedics* 112(3): 292–299
- 572 189. Millett DT, Cunningham SJ, O'Brien KD et al. (2018) Orthodontic treatment for deep  
573 bite and retroclined upper front teeth in children. [Review]. *Cochrane Database of*  
574 *Systematic Reviews* 2: CD005972. doi: 10.1002/14651858.CD005972.pub4
- 575 190. Mills CM, McCulloch KJ (1998) Treatment effects of the twin block appliance: A  
576 cephalometric study. *Am. J. Orthod. Dentofac. Orthop.* 114(1): 15–24. doi:  
577 10.1016/S0889-5406(98)70232-X
- 578 191. Mills CM, McCulloch KJ (2000) Posttreatment changes after successful correction of  
579 Class II malocclusions with the twin block appliance. *American Journal of Orthodontics*  
580 *& Dentofacial Orthopedics* 118(1): 24–33
- 581 192. Minase RA, Bhad WA, Doshi UH (2019) Effectiveness of reverse twin block with lip  
582 pads-RME and face mask with RME in the early treatment of class III malocclusion.  
583 *Progress in Orthodontics* 20(1): 14. doi: 10.1186/s40510-019-0266-0
- 584 193. Ming Y, Hu Y, Li Y et al. (2018) Effects of maxillary protraction appliances on airway  
585 dimensions in growing class III maxillary retrognathic patients: A systematic review and  
586 meta-analysis. [Review]. *International Journal of Pediatric Otorhinolaryngology*  
587 105: 138–145. doi: 10.1016/j.ijporl.2017.12.013
- 588 194. Mutinelli S, Cozzani M (2015) Rapid maxillary expansion in early-mixed dentition:  
589 effectiveness of increasing arch dimension with anchorage on deciduous teeth. *European*  
590 *Journal of Paediatric Dentistry* 16(2): 115–122
- 591 195. Mutinelli S, Manfredi M, Guiducci A et al. (2015) Anchorage onto deciduous teeth:  
592 effectiveness of early rapid maxillary expansion in increasing dental arch dimension and  
593 improving anterior crowding. *Progress in Orthodontics* 16: 22. doi: 10.1186/s40510-015-  
594 0093-x
- 595 196. Muto T, Yamazaki A, Takeda S (2008) A cephalometric evaluation of the pharyngeal  
596 airway space in patients with mandibular retrognathia and prognathia, and normal  
597 subjects. *Int. J. Oral Maxillofac. Surg.* 37(3): 228–231. doi: 10.1016/j.ijom.2007.06.020
- 598 197. Nalbantgil D, Arun T, Sayinsu K et al. (2005) Skeletal, dental and soft-tissue changes  
599 induced by the Jasper Jumper appliance in late adolescence. *Angle Orthodontist*  
600 75(3): 426–436
- 601 198. Ngan P, Yiu C, Hu A et al. (1998) Cephalometric and occlusal changes following  
602 maxillary expansion and protraction. *European Journal of Orthodontics* 20(3): 237–254
- 603 199. Nguyen QV, Bezemer PD, Habets L et al. (1999) A systematic review of the relationship  
604 between overjet size and traumatic dental injuries. *Eur. J. Orthodont.* 21(5): 503–515.  
605 doi: 10.1093/ejo/21.5.503
- 606 200. Nienkemper M, Wilmes B, Franchi L et al. (2015) Effectiveness of maxillary protraction  
607 using a hybrid hyrax-facemask combination: a controlled clinical study. *Angle*  
608 *Orthodontist* 85(5): 764–770. doi: 10.2319/071614-497.1
- 609 201. Nucera R, Lo, Giudice, A, Rustico L et al. (2016) Effectiveness of orthodontic treatment  
610 with functional appliances on maxillary growth in the short term: A systematic review

- 611 and meta-analysis. [Review]. *American Journal of Orthodontics & Dentofacial*  
612 *Orthopedics* 149(5): 600-611.e3. doi: 10.1016/j.ajodo.2015.09.030
- 613 202. O'Brien K, Macfarlane T, Wright J et al. (2009) Early treatment for Class II malocclusion  
614 and perceived improvements in facial profile. *American Journal of Orthodontics &*  
615 *Dentofacial Orthopedics* 135(5): 580–585. doi: 10.1016/j.ajodo.2008.02.020
- 616 203. O'Brien K, Wright J, Conboy F et al. (2003) Effectiveness of early orthodontic treatment  
617 with the Twin-block appliance: a multicenter, randomized, controlled trial. Part 1: Dental  
618 and skeletal effects. *American Journal of Orthodontics & Dentofacial Orthopedics*  
619 124(3): 234-43; quiz 339
- 620 204. O'Brien K, Wright J, Conboy F et al. (2003) Effectiveness of early orthodontic treatment  
621 with the Twin-block appliance: a multicenter, randomized, controlled trial. Part 2:  
622 Psychosocial effects. *American Journal of Orthodontics & Dentofacial Orthopedics*  
623 124(5): 488-94; discussion 494-5
- 624 205. Oh H, Baumrind S, Korn EL et al. (2017) A retrospective study of Class II mixed-  
625 dentition treatment. *Angle Orthodontist* 87(1): 56–67. doi: 10.2319/012616-72.1
- 626 206. Oz U, Orhan K, Rubenduz M (2013) Two-dimensional lateral cephalometric evaluation  
627 of varying types of Class II subgroups on posterior airway space in postadolescent girls:  
628 a pilot study. *Journal of Orofacial Orthopedics* 74(1): 18–27. doi: 10.1007/s00056-012-  
629 0121-0
- 630 207. Oztoprak MO, Nalbantgil D, Uyanlar A et al. (2012) A cephalometric comparative study  
631 of class II correction with Sabbagh Universal Spring (SUS(2)) and Forsus FRD  
632 appliances. *European journal of dentistry* 6(3): 302–310
- 633 208. Palomares NB, Celeste RK, Oliveira BH et al. (2012) How does orthodontic treatment  
634 affect young adults' oral health-related quality of life? *American Journal of Orthodontics*  
635 *& Dentofacial Orthopedics* 141(6): 751–758. doi: 10.1016/j.ajodo.2012.01.015
- 636 209. Pancherz H (1979) Treatment of class II malocclusions by jumping the bite with the  
637 Herbst appliance. A cephalometric investigation. *American Journal of Orthodontics*  
638 76(4): 423–442
- 639 210. Pancherz H (1982) The mechanism of Class II correction in Herbst appliance treatment.  
640 A cephalometric investigation. *American Journal of Orthodontics* 82(2): 104–113
- 641 211. Pangrazio MNK, Pangrazio-Kulbersh V, Berger JL et al. (2012) Treatment effects of the  
642 mandibular anterior repositioning appliance in patients with Class II skeletal  
643 malocclusions. *Angle Orthod.* 82(6): 971–977. doi: 10.2319/120511-748.1
- 644 212. Papadopoulos MA, Melkos AB, Athanasiou AE (2010) Noncompliance maxillary molar  
645 distalization with the first class appliance: a randomized controlled trial. *American*  
646 *Journal of Orthodontics & Dentofacial Orthopedics* 137(5): 586.e1-586.e13; discussion  
647 586-7. doi: 10.1016/j.ajodo.2009.10.033
- 648 213. Papageorgiou SN, Kutschera E, Memmert S et al. (2017) Effectiveness of early  
649 orthopaedic treatment with headgear: a systematic review and meta-analysis. [Review].  
650 *European Journal of Orthodontics* 39(2): 176–187. doi: 10.1093/ejo/cjw041
- 651 214. Pavoni C, Cretella, Lombardo, E, Lione R et al. (2017) Orthopaedic treatment effects of  
652 functional therapy on the sagittal pharyngeal dimensions in subjects with sleep-



- 653           disordered breathing and Class II malocclusion. *Acta Otorhinolaryngologica Italica*  
654           37(6): 479–485. doi: 10.14639/0392-100X-1420
- 655   215. Pavoni C, Gazzani F, Franchi L et al. (2019) Soft tissue facial profile in Class III  
656           malocclusion: long-term post-pubertal effects produced by the Face Mask Protocol.  
657           *European Journal of Orthodontics* 019. doi: 10.1093/ejo/cjz003
- 658   216. Pavoni C, Lombardo EC, Franchi L et al. (2017) Treatment and post-treatment effects of  
659           functional therapy on the sagittal pharyngeal dimensions in Class II subjects. *Int. J.*  
660           *Pediatr. Otorhinolaryngol.* 101: 47–50. doi: 10.1016/j.ijporl.2017.07.032
- 661   217. Pavoni C, Lombardo EC, Lione R et al. (2018) Treatment timing for functional jaw  
662           orthopaedics followed by fixed appliances: a controlled long-term study. *European*  
663           *Journal of Orthodontics* 40(4): 430–436. doi: 10.1093/ejo/cjx078
- 664   218. Peres KG, Barros AJD, Anselmi L et al. (2008) Does malocclusion influence the  
665           adolescent's satisfaction with appearance? A cross-sectional study nested in a Brazilian  
666           birth cohort. *Community Dentist. Oral Epidemiol.* 36(2): 137–143. doi: 10.1111/j.1600-  
667           0528.2007.00382.x
- 668   219. Perillo L, Castaldo MI, Cannavale R et al. (2011) Evaluation of long-term effects in  
669           patients treated with Frankel-2 appliance. *European Journal of Paediatric Dentistry*  
670           12(4): 261–266
- 671   220. Perillo L, Johnston, LE, Jr, Ferro A (1996) Permanence of skeletal changes after function  
672           regulator (FR-2) treatment of patients with retrusive Class II malocclusions. *American*  
673           *Journal of Orthodontics & Dentofacial Orthopedics* 109(2): 132–139
- 674   221. Perillo L, Vitale M, Masucci C et al. (2016) Comparisons of two protocols for the early  
675           treatment of Class III dentoskeletal disharmony. *European Journal of Orthodontics*  
676           38(1): 51–56
- 677   222. Perinetti G, Primožic J, Franchi L et al. (2015) Treatment Effects of Removable  
678           Functional Appliances in Pre-Pubertal and Pubertal Class II Patients: A Systematic  
679           Review and Meta-Analysis of Controlled Studies. [Review]. *PLoS ONE [Electronic*  
680           *Resource]* 10(10): e0141198. doi: 10.1371/journal.pone.0141198
- 681   223. Petren S, Bondemark L (2008) Correction of unilateral posterior crossbite in the mixed  
682           dentition: a randomized controlled trial. *American Journal of Orthodontics & Dentofacial*  
683           *Orthopedics* 133(6): 790.e7-13. doi: 10.1016/j.ajodo.2007.11.021
- 684   224. Petti S (2015) Over two hundred million injuries to anterior teeth attributable to large  
685           overjet: a meta-analysis. *Dental Traumatology* 31(1): 1–8. doi: 10.1111/edt.12126
- 686   225. Petti S, Tarsitani G (1996) Traumatic injuries to anterior teeth in Italian schoolchildren:  
687           prevalence and risk factors. *Endod. Dent. Traumatol.* 12(6): 294–297. doi:  
688           10.1111/j.1600-9657.1996.tb00530.x
- 689   226. Piassi E, Antunes LS, Antunes LA (2016) Orthodontic treatment reduces the impact on  
690           children and adolescents' oral health-related quality of life. [Review]. *Indian Journal of*  
691           *Dental Research* 27(2): 213–219. doi: 10.4103/0970-9290.183122
- 692   227. Piassi E, Antunes LS, Graça TCA et al. (2019) The Impact of Mixed Dentition  
693           Malocclusion on the Oral Health-Related Quality of Life for Children and Their

- 694 Families: A Case-Control Study. *J. Clin. Pediatr. Dent.* 43(3): 211–217. doi:  
695 10.17796/1053-4625-43.3.12
- 696 228. Pirilä-Parkkinen K, Pirttiniemi P, Nieminen P et al. (2009) Dental arch morphology in  
697 children with sleep-disordered breathing. *Eur. J. Orthodont.* 31(2): 160–167. doi:  
698 10.1093/ejo/cjn061
- 699 229. Pithon MM, Santos NL, Santos CR et al. (2016) Is alternate rapid maxillary expansion  
700 and constriction an effective protocol in the treatment of Class III malocclusion? A  
701 systematic review. *Dental Press Journal of Orthodontics* 21(6): 34–42. doi:  
702 10.1590/2177-6709.21.6.034-042.oar
- 703 230. Pontes LF, Maia FA, Almeida MR et al. (2017) Mandibular Protraction Appliance  
704 Effects in Class II Malocclusion in Children, Adolescents and Young Adults. *Brazilian*  
705 *Dental Journal* 28(2): 225–233. doi: 10.1590/0103-6440201701032
- 706 231. Prado RF, Ramos-Jorge J, Marques LS et al. (2016) Prospective evaluation of the  
707 psychosocial impact of the first 6 months of orthodontic treatment with fixed appliance  
708 among young adults. *Angle Orthodontist* 86(4): 644–648. doi: 10.2319/063015-434.1
- 709 232. Primo-Miranda EF, Ramos-Jorge ML, Homem MA et al. (2019) Association between  
710 occlusal characteristics and the occurrence of dental trauma in preschool children: a case-  
711 control study. *Dental Traumatology* 35(2): 95–100. doi: 10.1111/edt.12457
- 712 233. Quintao C, Helena I, Brunharo VP et al. (2006) Soft tissue facial profile changes  
713 following functional appliance therapy. *European Journal of Orthodontics* 28(1): 35–41
- 714 234. Raveli TB, Raveli DB, Gandini LG et al. (2017) Dental skeletal effects of the metallic  
715 splinted Herbst appliance after growth spurt: a lateral oblique cephalometric assessment.  
716 *Acta Odontologica Latinoamericana* 30(2): 76–82
- 717 235. Ren Y, Steegman R, Dieters A et al. (2019) Bone-anchored maxillary protraction in  
718 patients with unilateral complete cleft lip and palate and Class III malocclusion. *Clinical*  
719 *Oral Investigations* 23(5): 2429–2441. doi: 10.1007/s00784-018-2627-3
- 720 236. Rey D, Angel D, Oberti G et al. (2008) Treatment and posttreatment effects of  
721 mandibular cervical headgear followed by fixed appliances in Class III malocclusion.  
722 *American Journal of Orthodontics & Dentofacial Orthopedics* 133(3): 371-8; quiz  
723 476.e1. doi: 10.1016/j.ajodo.2006.04.043
- 724 237. Rizk S, Kulbersh VP, Al-Qawasmi R (2016) Changes in the oropharyngeal airway of  
725 Class II patients treated with the mandibular anterior repositioning appliance. *Angle*  
726 *Orthodontist* 86(6): 955–961
- 727 238. Rodrigues,de,Almeida,M, Castanha,Henriques,JF, Rodrigues,de,Almeida,R et al. (2002)  
728 Treatment effects produced by Frankel appliance in patients with class II, division 1  
729 malocclusion. *Angle Orthodontist* 72(5): 418–425
- 730 239. Rodriguez,de,Guzman-Barrera,J, Saez,Martinez,C, Boronat-Catala M et al. (2017)  
731 Effectiveness of interceptive treatment of class III malocclusions with skeletal  
732 anchorage: A systematic review and meta-analysis. *PLoS ONE [Electronic Resource]*  
733 12(3): e0173875. doi: 10.1371/journal.pone.0173875

- 734 240. Rongo R, D'Anto V, Bucci R et al. (2017) Skeletal and dental effects of Class III  
735 orthopaedic treatment: a systematic review and meta-analysis. [Review]. *Journal of Oral*  
736 *Rehabilitation* 44(7): 545–562. doi: 10.1111/joor.12495
- 737 241. Ruf S, Pancherz H (1999) Dentoskeletal effects and facial profile changes in young  
738 adults treated with the Herbst appliance. *Angle Orthodontist* 69(3): 239–246
- 739 242. Ryan V, Chris AM, Dischinger T et al. (2006) Treatment effects of the edgewise Herbst  
740 appliance: A cephalometric and tomographic investigation. *Am. J. Orthod. Dentofac.*  
741 *Orthop.* 130(5): 582–593. doi: 10.1016/j.ajodo.2005.01.030
- 742 243. Saikoski LZ, Cancado RH, Valarelli FP et al. (2014) Dentoskeletal effects of Class II  
743 malocclusion treatment with the Twin Block appliance in a Brazilian sample: a  
744 prospective study. *Dental Press Journal of Orthodontics* 19(1): 36–45
- 745 244. Sambataro S, Fastuca R, Oppermann NJ et al. (2017) Cephalometric changes in growing  
746 patients with increased vertical dimension treated with cervical headgear. *Journal of*  
747 *Orofacial Orthopedics* 78(4): 312–320. doi: 10.1007/s00056-017-0087-z
- 748 245. Santamaria-Villegas A, Manrique-Hernandez R, Alvarez-Varela E et al. (2017) Effect of  
749 removable functional appliances on mandibular length in patients with class II with  
750 retrognathism: systematic review and meta-analysis. [Review]. *BMC Oral Health*  
751 17(1): 52. doi: 10.1186/s12903-017-0339-8
- 752 246. Sauer C, Schlüter B, Hinz R et al. (2012) Childhood obstructive sleep apnea syndrome:  
753 an interdisciplinary approach: a prospective epidemiological study of 4,318 five-and-a-  
754 half-year-old children. *Journal of Orofacial Orthopedics* 73(5): 342–358. doi:  
755 10.1007/s00056-012-0096-x
- 756 247. Schatz J-P, Hakeberg M, Ostini E et al. (2013) Prevalence of traumatic injuries to  
757 permanent dentition and its association with overjet in a Swiss child population. *Dental*  
758 *Traumatology* 29(2): 110–114. doi: 10.1111/j.1600-9657.2012.01150.x
- 759 248. Schiavon, Gandini, MR, Gandini, LG, Jr, Da, Rosa, Martins, JC et al. (2001) Effects of  
760 cervical headgear and edgewise appliances on growing patients. *American Journal of*  
761 *Orthodontics & Dentofacial Orthopedics* 119(5): 531-8; discussion 538-9
- 762 249. Schulz S, Koos B, Duske K et al. (2016) Skeletal effects in Angle Class II/1 patients  
763 treated with the functional regulator type II : Cephalometric and tensor analysis. *Journal*  
764 *of Orofacial Orthopedics* 77(6): 420–431
- 765 250. Seehra J, Fleming PS, Mandall N et al. (2012) A comparison of two different techniques  
766 for early correction of Class III malocclusion. *Angle Orthodontist* 82(1): 96–101. doi:  
767 10.2319/032011-197.1
- 768 251. Seehra J, Fleming PS, Newton T et al. (2011) Bullying in orthodontic patients and its  
769 relationship to malocclusion, self-esteem and oral health-related quality of life. *Journal of*  
770 *Orthodontics* 38(4): 247-56; quiz 294. doi: 10.1179/14653121141641
- 771 252. Seehra J, Newton JT, DiBiase AT (2013) Interceptive orthodontic treatment in bullied  
772 adolescents and its impact on self-esteem and oral-health-related quality of life. *European*  
773 *Journal of Orthodontics* 35(5): 615–621. doi: 10.1093/ejo/cjs051

- 774 253. Sepanian VF, Sonnesen L (2018) Incisor root resorption in class II division 2 patients in  
775 relation to orthodontic treatment. *Eur. J. Orthodont.* 40(3): 337–342. doi:  
776 10.1093/ejo/cjx086
- 777 254. Servello DF, Fallis DW, Alvetro L (2015) Analysis of Class II patients, successfully  
778 treated with the straight-wire and Forsus appliances, based on cervical vertebral  
779 maturation status. *Angle Orthodontist* 85(1): 80–86. doi: 10.2319/102513-780.1
- 780 255. Sideri S, Papageorgiou SN, Eliades T (2017) Are orthodontic systematic reviews  
781 registered a priori in PROSPERO? *Journal of Orthodontics* 44(4): 249–255. doi:  
782 10.1080/14653125.2017.1370773
- 783 256. Sierwald I, John MT, Schierz O et al. (2015) Association of overjet and overbite with  
784 esthetic impairments of oral health-related quality of life. *J Orofac Orthop* 76(5): 405–  
785 420. doi: 10.1007/s00056-015-0300-x
- 786 257. Siluvai S, Kshetrimayum N, Reddy CVK et al. (2015) Malocclusion and related quality  
787 of life among 13- to 19-year-old students in Mysore City - a cross-sectional study. *Oral*  
788 *Health Prev. Dent.* 13(2): 135–141. doi: 10.3290/j.ohpd.a32339
- 789 258. Silvestrini-Biavati A, Alberti G, Silvestrini, Biavati, F et al. (2012) Early functional  
790 treatment in Class II division 1 subjects with mandibular retrognathia using Frankel II  
791 appliance. A prospective controlled study. *European Journal of Paediatric Dentistry*  
792 13(4): 301–306
- 793 259. Silvola A-S, Närhi L, Tolvanen M et al. (2020) Gender-specific associations of  
794 malocclusion traits with oral health-related quality of life in a Finnish adult population.  
795 *Eur. J. Orthodont.* 42(3): 242–249. doi: 10.1093/ejo/cjz026
- 796 260. So LL (1996) Effects of reverse headgear treatment on sagittal correction in girls born  
797 with unilateral complete cleft lip and cleft palate--skeletal and dental changes. *American*  
798 *Journal of Orthodontics & Dentofacial Orthopedics* 109(2): 140–147
- 799 261. Soares TRC, Magno MB, Jural LA et al. (2018) Risk factors for traumatic dental injuries  
800 in the Brazilian population: A critical review. *Dental Traumatology* 34(6): 445–454. doi:  
801 10.1111/edt.12439
- 802 262. Sollenius O, Golez A, Primožic J et al. (2019) Three-dimensional evaluation of forced  
803 unilateral posterior crossbite correction in the mixed dentition: a randomized controlled  
804 trial. *European Journal of Orthodontics* 019. doi: 10.1093/ejo/cjz054
- 805 263. Sonnesen L, Svensson P (2008) Temporomandibular disorders and psychological status  
806 in adult patients with a deep bite. *Eur. J. Orthodont.* 30(6): 621–629. doi:  
807 10.1093/ejo/cjn044
- 808 264. Spalj S, Tranesen KM, Birkeland K et al. (2017) Comparison of Activator-Headgear and  
809 Twin Block Treatment Approaches in Class II Division 1 Malocclusion. *Biomed Res.*  
810 *Int.* doi: 10.1155/2017/4861924
- 811 265. Suzuki J, Shimazaki K, Koike S et al. (2018) Gastric emptying rate before and after  
812 orthodontic treatment examined with the [<sup>13</sup>C] breath test: A pilot study. *American*  
813 *Journal of Orthodontics & Dentofacial Orthopedics* 153(3): 347–354. doi:  
814 10.1016/j.ajodo.2017.06.025

- 815 266. Tai K, Park JH, Mishima K et al. (2011) 3-Dimensional cone-beam computed  
816 tomography analysis of transverse changes with Schwarz appliances on both jaws. *Angle*  
817 *Orthodontist* 81(4): 670–677. doi: 10.2319/110910-655.1
- 818 267. Takemoto Y, Saitoh I, Iwasaki T et al. (2011) Pharyngeal airway in children with  
819 prognathism and normal occlusion. *Angle Orthodontist* 81(1): 75–80. doi:  
820 10.2319/013010-65.1
- 821 268. Tepedino M, Della, Noce, MV, Ciavarella D et al. (2019) Soft-tissue changes after Class II  
822 malocclusion treatment using the Sander bite-jumping appliance: a retrospective study.  
823 *Minerva Stomatologica* 68(3): 118–125. doi: 10.23736/S0026-4970.19.04197-9
- 824 269. Thiruvenkatachari B, Harrison J, Worthington H et al. (2015) Early orthodontic treatment  
825 for Class II malocclusion reduces the chance of incisal trauma: Results of a Cochrane  
826 systematic review. [Review]. *American Journal of Orthodontics & Dentofacial*  
827 *Orthopedics* 148(1): 47–59. doi: 10.1016/j.ajodo.2015.01.030
- 828 270. Thiruvenkatachari B, Harrison JE, Worthington HV et al. (2013) Orthodontic treatment  
829 for prominent upper front teeth (Class II malocclusion) in children. [Review]. *Cochrane*  
830 *Database of Systematic Reviews* 013(11): CD003452. doi:  
831 10.1002/14651858.CD003452.pub3
- 832 271. Tindlund RS, Rygh P (1993) Maxillary protraction: different effects on facial  
833 morphology in unilateral and bilateral cleft lip and palate patients. *Cleft Palate*  
834 *Craniofacial Journal* 30(2): 208–221
- 835 272. Toffol LD, Pavoni C, Baccetti T et al. (2008) Orthopedic treatment outcomes in Class III  
836 malocclusion. A systematic review. [Review] [40 refs]. *Angle Orthodontist* 78(3): 561–  
837 573. doi: 10.2319/030207-108.1
- 838 273. Tollaro I, Baccetti T, Franchi L (1996) Craniofacial changes induced by early functional  
839 treatment of Class III malocclusion. *American Journal of Orthodontics & Dentofacial*  
840 *Orthopedics* 109(3): 310–318
- 841 274. Toro A, Buschang PH, Throckmorton G et al. (2006) Masticatory performance in  
842 children and adolescents with Class I and II malocclusions. *Eur. J. Orthodont.*  
843 28(2): 112–119. doi: 10.1093/ejo/cji080
- 844 275. Torre H, Alarcon J-A (2012) Changes in nasal air flow and school grades after rapid  
845 maxillary expansion in oral breathing children. *Med. Oral Patol. Oral Cir. Bucal*  
846 17(5): E865-E870. doi: 10.4317/medoral.17810
- 847 276. Tortop T, Kaygisiz E, Gencer D et al. (2014) Modified tandem traction bow appliance  
848 compared with facemask therapy in treating Class III malocclusions. *Angle Orthodontist*  
849 84(4): 642–648. doi: 10.2319/080513-584.1
- 850 277. Toth LR, McNamara, JA, Jr (1999) Treatment effects produced by the twin-block  
851 appliance and the FR-2 appliance of Frankel compared with an untreated Class II sample.  
852 *American Journal of Orthodontics & Dentofacial Orthopedics* 116(6): 597–609
- 853 278. Trankmann J, Lisson JA, Treutlein C (2001) Different orthodontic treatment effects in  
854 Angle Class III patients. *Journal of Orofacial Orthopedics* 62(5): 327–336
- 855 279. Trawitzki LV, Dantas RO, Mello-Filho FV et al. (2010) Masticatory muscle function  
856 three years after surgical correction of class III dentofacial deformity. *International*

- 857 Journal of Oral & Maxillofacial Surgery 39(9): 853–856. doi:  
858 10.1016/j.ijom.2009.03.006
- 859 280. Trenouth MJ (2000) Cephalometric evaluation of the Twin-block appliance in the  
860 treatment of Class II Division 1 malocclusion with matched normative growth data.  
861 American Journal of Orthodontics & Dentofacial Orthopedics 117(1): 54–59
- 862 281. Trenouth MJ (2002) Proportional changes in cephalometric distances during Twin Block  
863 appliance therapy. European Journal of Orthodontics 24(5): 485–491
- 864 282. Trenouth MJ (2006) Centroid analysis of twin-block appliance treatment for Class II  
865 Division 1 malocclusion. World Journal of Orthodontics 7(2): 159–164
- 866 283. Trenouth MJ, Mew JR, Gibbs WW (2001) A cephalometric evaluation of the Biobloc  
867 technique using matched normative data. Journal of Orofacial Orthopedics 62(6): 466–  
868 475
- 869 284. Tristão, Sylvia Karla P C, Magno MB, Pintor AVB et al. (2020) Is there a relationship  
870 between malocclusion and bullying? A systematic review. Progress in Orthodontics  
871 21(1): 26. doi: 10.1186/s40510-020-00323-7
- 872 285. Tsiouli K, Topouzelis N, Papadopoulos MA et al. (2017) Perceived facial changes of  
873 Class II Division 1 patients with convex profiles after functional orthopedic treatment  
874 followed by fixed orthodontic appliances. Am. J. Orthod. Dentofac. Orthop. 152(1): 80–  
875 91. doi: 10.1016/j.ajodo.2016.12.017
- 876 286. Tulloch JF, Phillips C, Koch G et al. (1997) The effect of early intervention on skeletal  
877 pattern in Class II malocclusion: a randomized clinical trial. American Journal of  
878 Orthodontics & Dentofacial Orthopedics 111(4): 391–400
- 879 287. Tulloch JF, Proffit WR, Phillips C (2004) Outcomes in a 2-phase randomized clinical  
880 trial of early Class II treatment. American Journal of Orthodontics & Dentofacial  
881 Orthopedics 125(6): 657–667
- 882 288. Tumer N, Gultan AS (1999) Comparison of the effects of monoblock and twin-block  
883 appliances on the skeletal and dentoalveolar structures. American Journal of  
884 Orthodontics & Dentofacial Orthopedics 116(4): 460–468
- 885 289. Tuncer BB, Kaygisiz E, Tuncer C et al. (2009) Pharyngeal airway dimensions after chin  
886 cup treatment in Class III malocclusion subjects. J. Oral Rehabil. 36(2): 110–117. doi:  
887 10.1111/j.1365-2842.2008.01910.x
- 888 290. Turkkahraman H, Sayin MO (2006) Effects of activator and activator headgear  
889 treatment: comparison with untreated Class II subjects. Eur. J. Orthodont. 28(1): 27–34.  
890 doi: 10.1093/ejo/cji062
- 891 291. Ucem TT, Ucuncu N, Yuksel S (2004) Comparison of double-plate appliance and  
892 facemask therapy in treating Class III malocclusions. Am. J. Orthod. Dentofac. Orthop.  
893 126(6): 672–679. doi: 10.1016/j.ajodo.2003.09.035
- 894 292. Ulger G, Arun T, Sayinsu K et al. (2006) The role of cervical headgear and lower utility  
895 arch in the control of the vertical dimension. American Journal of Orthodontics &  
896 Dentofacial Orthopedics 130(4): 492–501

- 897 293. Ulusoy C, Canigur, Bavbek, N, Tuncer BB et al. (2014) Evaluation of airway dimensions  
898 and changes in hyoid bone position following class II functional therapy with activator.  
899 *Acta Odontologica Scandinavica* 72(8): 917–925. doi: 10.3109/00016357.2014.923109
- 900 294. Usumez S, Uysal T, Sari Z et al. (2004) The effects of early preorthodontic trainer  
901 treatment on Class II, division 1 patients. *Angle Orthodontist* 74(5): 605–609
- 902 295. van Lierde KM, Luyten A, D'haeseleer E et al. (2015) Articulation and oromyofunctional  
903 behavior in children seeking orthodontic treatment. *Oral Dis.* 21(4): 483–492. doi:  
904 10.1111/odi.12307
- 905 296. Vanlaecken R, Martin CA, Dischinger T et al. (2006) Treatment effects of the edgewise  
906 Herbst appliance: a cephalometric and tomographic investigation. *American Journal of*  
907 *Orthodontics & Dentofacial Orthopedics* 130(5): 582–593
- 908 297. Varlik SK, Iscan HN (2008) The effects of cervical headgear with an expanded inner  
909 bow in the permanent dentition. *European Journal of Orthodontics* 30(4): 425–430. doi:  
910 10.1093/ejo/cjn016
- 911 298. Vázquez-Casas I, Sans-Capdevila O, Moncunill-Mira J et al. (2020) Prevalence of sleep-  
912 related breathing disorders in children with malocclusion. *Journal of Clinical &*  
913 *Experimental Dentistry* 12(6): e555-e560. doi: 10.4317/jced.56855
- 914 299. Vilanova L, Henriques JF, Janson G et al. (2018) Class II malocclusion treatment effects  
915 with Jones Jig and Distal Jet followed by fixed appliances. *Angle Orthodontist* 88(1): 10–  
916 19
- 917 300. Watkinson S, Harrison JE, Furness S et al. (2013) Orthodontic treatment for prominent  
918 lower front teeth (Class III malocclusion) in children. [Review]. *Cochrane Database of*  
919 *Systematic Reviews* 013(9): CD003451. doi: 10.1002/14651858.CD003451.pub2
- 920 301. Wendl B, Muchitsch AP, Winsauer H et al. (2017) Retrospective 25-year follow-up of  
921 treatment outcomes in angle Class III patients : Early versus late treatment. *Journal of*  
922 *Orofacial Orthopedics* 78(3): 201–210. doi: 10.1007/s00056-016-0076-7
- 923 302. Westwood PV, McNamara JA, Baccetti T et al. (2003) Long-term effects of Class III  
924 treatment with rapid maxillary expansion and facemask therapy followed by fixed  
925 appliances. *Am. J. Orthod. Dentofac. Orthop.* 123(3): 306–320. doi:  
926 10.1067/mod.2003.44
- 927 303. Wieslander L (1975) Early or late cervical traction therapy of Class II malocclusion in  
928 the mixed dentition. *American Journal of Orthodontics* 67(4): 432–439
- 929 304. Woon SC, Thiruvengkatachari B (2017) Early orthodontic treatment for Class III  
930 malocclusion: A systematic review and meta-analysis. [Review]. *American Journal of*  
931 *Orthodontics & Dentofacial Orthopedics* 151(1): 28–52. doi:  
932 10.1016/j.ajodo.2016.07.017
- 933 305. Xiang M, Hu B, Liu Y et al. (2017) Changes in airway dimensions following functional  
934 appliances in growing patients with skeletal class II malocclusion: A systematic review  
935 and meta-analysis. [Review]. *International Journal of Pediatric Otorhinolaryngology*  
936 97: 170–180. doi: 10.1016/j.ijporl.2017.04.009

- 937 306. Yagci A, Uysal T (2010) Effects of conventional and modified facemask therapies on  
938 dentofacial structures. *Korean J. Orthod.* 40(6): 432–443. doi:  
939 10.4041/kjod.2010.40.6.432
- 940 307. Yang X, Li C, Bai D et al. (2014) Treatment effectiveness of Frankel function regulator  
941 on the Class III malocclusion: a systematic review and meta-analysis. [Review].  
942 *American Journal of Orthodontics & Dentofacial Orthopedics* 146(2): 143–154. doi:  
943 10.1016/j.ajodo.2014.04.017
- 944 308. Yavuz I, Halicioglu K, Ceylan I (2009) Face mask therapy effects in two skeletal  
945 maturation groups of female subjects with skeletal Class III malocclusions. *Angle*  
946 *Orthodontist* 79(5): 842–848. doi: 10.2319/090308-462.1
- 947 309. Zhang Y, Jia H, Fu Z et al. (2018) Dentoskeletal effects of facemask therapy in skeletal  
948 Class III cleft patients with or without bone graft. *American journal of orthodontics and*  
949 *dentofacial orthopedics* 153(4): 542–549
- 950 310. Zhao N, Feng J, Hu Z et al. (2015) Effects of a novel magnetic orthopedic appliance  
951 (MOA-III) on the dentofacial complex in mild to moderate skeletal class III children.  
952 *Head & Face Medicine* 11: 34. doi: 10.1186/s13005-015-0092-7
- 953 311. Zheng D-H, Wang X-X, Su Y-R et al. (2015) Assessing changes in quality of life using  
954 the Oral Health Impact Profile (OHIP) in patients with different classifications of  
955 malocclusion during comprehensive orthodontic treatment. *BMC Oral Health* 15: 148.  
956 doi: 10.1186/s12903-015-0130-7
- 957 312. Zhou Y, Long H, Ye N et al. (2014) The effectiveness of non-surgical maxillary  
958 expansion: a meta-analysis. *European Journal of Orthodontics* 36(2): 233–242. doi:  
959 10.1093/ejo/cjt044
- 960 313. Zhou Y, Wang Y, Wang X et al. (2014) The impact of orthodontic treatment on the  
961 quality of life a systematic review. *BMC Oral Health* 14: 66. doi: 10.1186/1472-6831-14-  
962 66
- 963 314. Zou B, Zhou Y, Lowe AA et al. (2015) Changes in anteroposterior position and  
964 inclination of the maxillary incisors after surgical-orthodontic treatment of skeletal class  
965 III malocclusions. *J. Cranio-MaxilloFac. Surg.* 43(10): 1986–1993. doi:  
966 10.1016/j.jcms.2014.12.013
- 967 315. Zymperdikas VF, Koretsi V, Papageorgiou SN et al. (2016) Treatment effects of fixed  
968 functional appliances in patients with Class II malocclusion: a systematic review and  
969 meta-analysis. [Review]. *European Journal of Orthodontics* 38(2): 113–126. doi:  
970 10.1093/ejo/cjv034
